# Supplementary material for: A porcine brain-wide RNA editing landscape
Source: Research Square preprint supplement (doi:10.21203/rs.3.rs-110949/v1), 2020-12-11
Supplement: Supplementary file 1 [file 14a437bd949eee6ef561301d.docx]

**A porcine brain-wide RNA editing landscape**

Jinrong Huang1,2,3*, Lin Lin3,4, Zhanying Dong1, Ling Yang1, Tianyu Zheng1, Weiwang Gu5, Yan Zhang6, Tailang Yin6, Evelina Sjöstedt7,8, Jan Mulder7, Mathias Uhlen7,8, Karsten Kristiansen2, Lars Bolund1,3, Yonglun Luo1,3,4*

**[Supplementary Figure Legends]**

**Fig. S1** | **The pipeline of A-to-I RNA editing analysis**

**Fig. S2** | **RNA editing type identified in the pig brain**.

**Fig. S3** | **The A-to-I editing sites located in CDS and 3-UTRs.** a, The number of nonsynonymous (recoding) and synonymous editing sites. b, Distribution of amino acid changes type. c, Distribution of editing sites relative to miRNA target sites in 3-UTRs. Not match, editing sites without miRNA target; Novel targets, editing sites which potentially create novel miRNA target; Interrupted, editing sites which potentially interrupt miRNA target. d, The top Gene ontology (GO) terms associated with genes harboring editing sites which potentially interrupt miRNA target.

**Fig. S4** | **Landscape of RNA editing sites across pig brain regions.** a, UpSetR plot showing the number of editing sites identified across 12 brain regions and the top ten intersection among regions. The number of A-to-I editing sites were normalized by uniquely mapped reads each sample on the right. b, Heatmap and dendrogram of correlations on the editing levels of different regions.

**Fig. S5** | **Region-specific editing sites within the pig brain.**

a, Heatmap showing region-specific editing sites with coverage ≥ 10 RNA reads in all regions. b, Go enrichment analysis of genes harboring at least one region-enriched editing site.

**Fig. S6** | **Known enzymes associated with A-to-I RNA editing.** Correlations between overall editing levels at all editing sites and expression levels of ADAR1 (a), ADAR2 (b), ADAR3 (c), AIMP2 (d), PIN1 (e) and WWP2 (f). R2 values were calculated by robust linear regressions on overall editing levels and normalized expression. Gray shaded areas, 95% confidence interval.

**Fig. S7** | **The ADARs expression in human astrocyte, microglia, neuron and oligodendrocyte.** a, ADAR1. b, ADAR2. (Wilcoxon test)

**Fig. S8** | **Distribution of the A-to-I RNA editing sites located in major neurotransmitter receptors.** a, RNA editing sites located in neurotransmitter receptors, including adrenergic, cholinergic, dopamine, GABA, glutamate, glycine, histamine, opioid and serotonin receptors. b, The number of recoding editing sites. c, The number of editing sites located in 3-UTRs.

**Fig. S9** | **Detailed information of editing sites located in glutamate receptors.**

**Fig. S10** | **Volcano plots showing species-biased editing sites in pig and human brain.** (a) cerebral cortex, (b) amygdala, (c) hippocampal formation, (d) hypothalamus, (e) cerebellum and (f) spinal cord. The X-axis represents the differential editing levels between pig and human. The Y-axis represents negative log10 (Fisher’s exact test p-value). For top differentially editing sites in genic region, their respective orthologous genes were indicated.
