# Supplementary material for: A porcine brain-wide RNA editing landscape
Source: Research Square preprint supplement (doi:10.21203/rs.3.rs-110949/v1), 2020-12-11
Supplement: Supplementary file 2 [file 4cc6687fdfd1b819ffcdbe41.xlsx]

## Sheet: Table S1
Table S1. List of all the 119 pig brain samples included in the analysis.
Brain region	Subregion	Pig ID	Sex
olfactory bulb	olfactory bulb	1	female
olfactory bulb	olfactory bulb	2	female
olfactory bulb	olfactory bulb	2	female
olfactory bulb	olfactory bulb	3	male
olfactory bulb	olfactory bulb	4	male
cerebral cortex	cingulate	1	female
cerebral cortex	cingulate	2	female
cerebral cortex	cingulate	3	male
cerebral cortex	cingulate	4	male
cerebral cortex	insular	1	female
cerebral cortex	insular	2	female
cerebral cortex	insular	3	male
cerebral cortex	insular	4	male
cerebral cortex	motor	1	female
cerebral cortex	motor	2	female
cerebral cortex	motor	3	male
cerebral cortex	motor	4	male
cerebral cortex	occipital	1	female
cerebral cortex	occipital	2	female
cerebral cortex	occipital	3	male
cerebral cortex	occipital	4	male
cerebral cortex	prefrontal	1	female
cerebral cortex	prefrontal	2	female
cerebral cortex	prefrontal	3	male
cerebral cortex	prefrontal	4	male
cerebral cortex	retrosplenial	1	female
cerebral cortex	retrosplenial	2	female
cerebral cortex	retrosplenial	3	male
cerebral cortex	retrosplenial	4	male
cerebral cortex	somatosensory	2	female
cerebral cortex	somatosensory	3	male
cerebral cortex	somatosensory	4	male
cerebral cortex	temporal	1	female
cerebral cortex	temporal	2	female
cerebral cortex	temporal	3	male
cerebral cortex	temporal	4	male
hippocampal formation	dorsal hippocampus	1	female
hippocampal formation	dorsal hippocampus	2	female
hippocampal formation	dorsal hippocampus	3	male
hippocampal formation	dorsal hippocampus	4	male
hippocampal formation	enhorinal cortex	1	female
hippocampal formation	enhorinal cortex	2	female
hippocampal formation	enhorinal cortex	3	male
hippocampal formation	enhorinal cortex	4	male
hippocampal formation	subiculum	1	female
hippocampal formation	subiculum	2	female
hippocampal formation	subiculum	3	male
hippocampal formation	subiculum	4	male
hippocampal formation	ventral hippocampus	1	female
hippocampal formation	ventral hippocampus	2	female
hippocampal formation	ventral hippocampus	3	male
hippocampal formation	ventral hippocampus	4	male
amygdala	amygdala	1	female
amygdala	amygdala	2	female
amygdala	amygdala	3	male
amygdala	amygdala	4	male
basal ganglia	caudate	1	female
basal ganglia	caudate	2	female
basal ganglia	caudate	3	male
basal ganglia	caudate	4	male
basal ganglia	putamen	1	female
basal ganglia	putamen	2	female
basal ganglia	putamen	3	male
basal ganglia	putamen	4	male
basal ganglia	septum	1	female
basal ganglia	septum	2	female
basal ganglia	septum	3	male
basal ganglia	septum	4	male
basal ganglia	ventral pallidum	1	female
basal ganglia	ventral pallidum	2	female
basal ganglia	ventral pallidum	3	male
basal ganglia	ventral pallidum	4	male
hypothalamus	hypothalamus	1	female
hypothalamus	hypothalamus	2	female
hypothalamus	hypothalamus	3	male
hypothalamus	hypothalamus	4	male
thalamus	thalamus	1	female
thalamus	thalamus	2	female
thalamus	thalamus	3	male
thalamus	thalamus	4	male
midbrain	midbrain	1	female
midbrain	midbrain	2	female
midbrain	midbrain	3	male
midbrain	midbrain	4	male
midbrain	periaqueductal gray	2	female
midbrain	periaqueductal gray	3	male
midbrain	periaqueductal gray	4	male
midbrain	substaia nigra	1	female
midbrain	substaia nigra	2	female
midbrain	substaia nigra	3	male
midbrain	substaia nigra	4	male
midbrain	superior colliculus	1	female
midbrain	superior colliculus	2	female
midbrain	superior colliculus	3	male
midbrain	superior colliculus	4	male
pons&medulla	medulla	1	female
pons&medulla	medulla	2	female
pons&medulla	medulla	3	male
pons&medulla	medulla	4	male
pons&medulla	pons	1	female
pons&medulla	pons	2	female
pons&medulla	pons	3	male
pons&medulla	pons	4	male
cerebellum	cerebellum	1	female
cerebellum	cerebellum	2	female
cerebellum	cerebellum	3	male
cerebellum	cerebellum	4	male
corpus callosum	corpus callosum	1	female
corpus callosum	corpus callosum	2	female
corpus callosum	corpus callosum	3	male
corpus callosum	corpus callosum	4	male
spinal cord	dorsal	1	female
spinal cord	dorsal	2	female
spinal cord	dorsal	3	male
spinal cord	dorsal	4	male
spinal cord	ventral	1	female
spinal cord	ventral	2	female
spinal cord	ventral	3	male
spinal cord	ventral	4	male

## Sheet: Table S2
Table S2. Sequencing information of whole genome sequencing data
Pig ID	Pig 1	Pig 2	Pig 3	Pig 4
Clean bases (Gb)	280.985	260.763	284.991	288.117
Total mapping rate (%)	97.79	97.82	97.77	97.86
Unique mapping rate (%)	92.6	93.26	93.21	93.12
Duplicate rate (%)	3.31	2.69	2.56	2.77
Average sequencing depth (X)	104.9	98.09	106.78	108.12
Coverage at least 1X	0.9819	0.9819	0.9848	0.9848
Coverage at least 10X	0.9794	0.9793	0.9821	0.9823
Coverage at least 20X	0.9773	0.977	0.9798	0.9801

## Sheet: Table S3a
Table S3a. List of conserved editing sites in Cerebral Cortex
Coordinate in Pig Genome	Pig Gene	Amino Acid Change in Pig	Coordinate in Human Genome	Human Gene	Amino Acid Change in Human	Editing level in Pig	Editing level in Human	Delta editing level	P value	Type
chr1:29711234	ENSSSCG00000021443:SGK1	-	chr6:134549309	SGK1	-	0.333333	1	0.666667	0.36	Unbiased
chr1:37121606	ENSSSCG00000004222:NCOA7	-	chr6:126176969	NCOA7	-	0.187204	1	0.812796	0.00697098	Human biased
chr1:38428230	-	-	chr6:124740689	NKAIN2	-	0.016487	0.166667	0.15018	0.0982202	Unbiased
chr1:49419160	ENSSSCG00000004270:ADGRB3	-	chr6:69882978	BAI3	-	0.202703	0.235772	0.0330697	0.453193	Unbiased
chr1:50736674	ENSSSCG00000004276:SMAP1	-	chr6:71298937	C6orf57	-	0.40625	0.0449129	-0.361337	7.17852e-23	Pig biased
chr1:50736742	ENSSSCG00000004276:SMAP1	-	chr6:71299053	C6orf57	-	0.387597	0.116129	-0.271468	3.98866e-12	Pig biased
chr1:50736743	ENSSSCG00000004276:SMAP1	-	chr6:71299054	C6orf57	-	0.5	0.0992366	-0.400763	3.95918e-19	Pig biased
chr1:50736757	ENSSSCG00000004276:SMAP1	-	chr6:71299066	C6orf57	-	0.152174	0.0663043	-0.0858696	0.0368023	Unbiased
chr1:52650598	-	-	chr6:73569446	KCNQ5	-	0.0574506	0.111111	0.0536605	0.419945	Unbiased
chr1:66463993	ENSSSCG00000038757:ENSSSCG00000038757	-	chr6:99980058	TSTD3	-	0.113879	0.142857	0.0289781	0.577459	Unbiased
chr1:68530727	ENSSSCG00000004361:GRIK2	ENSSSCG00000004361:ENSSSCT00000004819:I518V;ENSSSCG00000004361:ENSSSCT00000032833:I518V	chr6:102337689	GRIK2	GRIK2:ENST00000318991.6:exon11:c.A1699G:p.I567V,GRIK2:ENST00000369134.4:exon11:c.A1552G:p.I518V,GRIK2:ENST00000369138.1:exon11:c.A1699G:p.I567V,GRIK2:ENST00000413795.1:exon11:c.A1699G:p.I567V,GRIK2:ENST00000421544.1:exon11:c.A1699G:p.I567V	0.446636	0.418182	-0.0284539	0.143852	Unbiased
chr1:68530740	ENSSSCG00000004361:GRIK2	ENSSSCG00000004361:ENSSSCT00000004819:Y522C;ENSSSCG00000004361:ENSSSCT00000032833:Y522C	chr6:102337702	GRIK2	GRIK2:ENST00000318991.6:exon11:c.A1712G:p.Y571C,GRIK2:ENST00000369134.4:exon11:c.A1565G:p.Y522C,GRIK2:ENST00000369138.1:exon11:c.A1712G:p.Y571C,GRIK2:ENST00000413795.1:exon11:c.A1712G:p.Y571C,GRIK2:ENST00000421544.1:exon11:c.A1712G:p.Y571C	0.754078	0.803797	0.0497197	0.00388368	Unbiased
chr1:68540764	ENSSSCG00000004361:GRIK2	-	chr6:102347627	GRIK2	-	0.0667184	0.145833	0.0791149	0.0439477	Unbiased
chr1:68564368	ENSSSCG00000004361:GRIK2	ENSSSCG00000004361:ENSSSCT00000004819:G566G;ENSSSCG00000004361:ENSSSCT00000032833:G566G	chr6:102372572	GRIK2	GRIK2:ENST00000318991.6:exon12:c.A1845G:p.G615G,GRIK2:ENST00000369134.4:exon12:c.A1698G:p.G566G,GRIK2:ENST00000369138.1:exon12:c.A1845G:p.G615G,GRIK2:ENST00000413795.1:exon12:c.A1845G:p.G615G,GRIK2:ENST00000421544.1:exon12:c.A1845G:p.G615G	0.392516	0.282486	-0.11003	7.55941e-08	Unbiased
chr1:68564385	ENSSSCG00000004361:GRIK2	ENSSSCG00000004361:ENSSSCT00000004819:Q572R;ENSSSCG00000004361:ENSSSCT00000032833:Q572R	chr6:102372589	GRIK2	GRIK2:ENST00000318991.6:exon12:c.A1862G:p.Q621R,GRIK2:ENST00000369134.4:exon12:c.A1715G:p.Q572R,GRIK2:ENST00000369138.1:exon12:c.A1862G:p.Q621R,GRIK2:ENST00000413795.1:exon12:c.A1862G:p.Q621R,GRIK2:ENST00000421544.1:exon12:c.A1862G:p.Q621R	0.863161	0.84172	-0.0214414	0.0854955	Unbiased
chr1:68564426	ENSSSCG00000004361:GRIK2	-	chr6:102372630	GRIK2	-	0.658235	0.515337	-0.142898	0.000410455	Unbiased
chr1:68564478	ENSSSCG00000004361:GRIK2	-	chr6:102372682	GRIK2	-	0.0683761	0.229412	0.161036	2.44497e-10	Unbiased
chr1:68564727	ENSSSCG00000004361:GRIK2	-	chr6:102372931	GRIK2	-	0.750656	0.197183	-0.553473	1.18733e-18	Pig biased
chr1:68566288	ENSSSCG00000004361:GRIK2	-	chr6:102374553	GRIK2	-	0.222864	0.333333	0.11047	3.00466e-05	Unbiased
chr1:68566294	ENSSSCG00000004361:GRIK2	-	chr6:102374559	GRIK2	-	0.111964	0.206633	0.0946685	2.25517e-06	Unbiased
chr1:68566307	ENSSSCG00000004361:GRIK2	-	chr6:102374572	GRIK2	-	0.281731	0.787234	0.505503	3.62355e-66	Human biased
chr1:68566337	ENSSSCG00000004361:GRIK2	-	chr6:102374602	GRIK2	-	0.0949721	0.156463	0.0614905	0.0377929	Unbiased
chr1:68566351	ENSSSCG00000004361:GRIK2	-	chr6:102374616	GRIK2	-	0.697368	0.76082	0.0634516	0.0154902	Unbiased
chr1:68566369	ENSSSCG00000004361:GRIK2	-	chr6:102374634	GRIK2	-	0.337232	0.364045	0.026813	0.339629	Unbiased
chr1:68566378	ENSSSCG00000004361:GRIK2	-	chr6:102374643	GRIK2	-	0.937008	0.972727	0.0357194	0.00446518	Unbiased
chr1:73574441	ENSSSCG00000004379:SOBP	-	chr6:107835158	SOBP	-	0.0242588	0.407895	0.383636	3.16656e-19	Human biased
chr1:74653121	ENSSSCG00000004387:FOXO3	-	chr6:108905960	FOXO3	-	0.116279	0.714286	0.598007	0.000739908	Human biased
chr1:74653136	ENSSSCG00000004387:FOXO3	-	chr6:108905976	FOXO3	-	0.0916667	0.411765	0.320098	0.00182735	Human biased
chr1:74653143	ENSSSCG00000004387:FOXO3	-	chr6:108905983	FOXO3	-	0.0410959	1	0.958904	4.45601e-11	Human biased
chr1:74653158	ENSSSCG00000004387:FOXO3	-	chr6:108905998	FOXO3	-	0.43949	0.611111	0.171621	0.213379	Unbiased
chr1:74653172	ENSSSCG00000004387:FOXO3	-	chr6:108906012	FOXO3	-	0.117318	0.4	0.282682	0.118388	Unbiased
chr1:74653998	ENSSSCG00000004387:FOXO3	-	chr6:108906934	FOXO3	-	0.141612	0.428571	0.286959	0.0103778	Unbiased
chr1:74653999	ENSSSCG00000004387:FOXO3	-	chr6:108906935	FOXO3	-	0.232099	0.944444	0.712346	7.10676e-10	Human biased
chr1:74654020	ENSSSCG00000004387:FOXO3	-	chr6:108906959	FOXO3	-	0.0772532	0.705882	0.628629	1.0186e-09	Human biased
chr1:74654042	ENSSSCG00000004387:FOXO3	-	chr6:108906981	FOXO3	-	0.104513	0.75	0.645487	2.59505e-12	Human biased
chr1:80366192	-	-	chr6:114783165	RP3-399L15.3	-	0.2	1	0.8	0.238095	Unbiased
chr1:96462954	ENSSSCG00000034730:PIAS2	-	chr18:44408246	PIAS2	-	0.758621	0.363636	-0.394984	0.0269158	Unbiased
chr1:98356728	ENSSSCG00000004506:CTIF	-	chr18:46286834	CTIF	-	0.118421	0.268698	0.150277	0.000124672	Unbiased
chr1:100141127	ENSSSCG00000004520:MAPK4	-	chr18:48122249	MAPK4	-	0.162281	0.5	0.337719	0.00942882	Human biased
chr1:100142055	ENSSSCG00000004520:MAPK4	-	chr18:48123102	MAPK4	-	0.0975232	0.409091	0.311568	0.000189645	Human biased
chr1:100142056	ENSSSCG00000004520:MAPK4	-	chr18:48123103	MAPK4	-	0.0673401	0.25	0.18266	0.0226475	Unbiased
chr1:100142057	ENSSSCG00000004520:MAPK4	-	chr18:48123104	MAPK4	-	0.0893417	0.235294	0.145952	0.0643883	Unbiased
chr1:100142081	ENSSSCG00000004520:MAPK4	-	chr18:48123131	MAPK4	-	0.497807	0.142857	-0.35495	0.123696	Unbiased
chr1:100142097	ENSSSCG00000004520:MAPK4	-	chr18:48123147	MAPK4	-	0.103854	0.1875	0.0836456	0.232546	Unbiased
chr1:100142289	ENSSSCG00000004520:MAPK4	-	chr18:48123334	MAPK4	-	0.624494	0.222222	-0.402272	0.000842208	Pig biased
chr1:100142293	ENSSSCG00000004520:MAPK4	-	chr18:48123338	MAPK4	-	0.032146	0.357143	0.324997	7.53762e-05	Human biased
chr1:100142355	ENSSSCG00000004520:MAPK4	-	chr18:48123439	MAPK4	-	0.0574128	0.0967742	0.0393614	0.420964	Unbiased
chr1:100142360	ENSSSCG00000004520:MAPK4	-	chr18:48123444	MAPK4	-	0.104762	0.375	0.270238	0.0441687	Unbiased
chr1:100142368	ENSSSCG00000004520:MAPK4	-	chr18:48123450	MAPK4	-	0.420824	0.333333	-0.087491	0.631896	Unbiased
chr1:101895645	-	-	chr18:49914776	DCC	-	0.0882557	0.153846	0.0655904	0.323604	Unbiased
chr1:106160072	ENSSSCG00000004538:WDR7	-	chr18:54436494	WDR7	-	0.577778	0.111111	-0.466667	0.000222293	Pig biased
chr1:111085485	-	-	chr15:61167370	RORA	-	0.337989	0.444444	0.106456	0.496683	Unbiased
chr1:122573868	ENSSSCG00000004652:COPS2	-	chr15:49418958	COPS2	-	0.0246753	0.0172414	-0.00743395	1	Unbiased
chr1:127434244	-	-	chr15:44380556	FRMD5	-	0.0466102	0.0425532	-0.00405698	1	Unbiased
chr1:141889445	ENSSSCG00000004832:UBE3A	-	chr15:25681878	UBE3A	-	0.0206254	1	0.979375	5.24978e-20	Human biased
chr1:141889456	ENSSSCG00000004832:UBE3A	-	chr15:25681867	UBE3A	-	0.0154259	0.545455	0.530029	1.30073e-08	Human biased
chr1:163059404	ENSSSCG00000004921:ENSSSCG00000004921	-	chr18:55317858	RP11-35G9.3,RP11-35G9.5	-	0.0775862	0.25	0.172414	0.297202	Unbiased
chr1:163059432	ENSSSCG00000004921:ENSSSCG00000004921	-	chr18:55317826	RP11-35G9.3,RP11-35G9.5	-	0.0381679	0.333333	0.295165	0.129329	Unbiased
chr1:163170088	ENSSSCG00000004926:PDCD7	ENSSSCG00000004926:ENSSSCT00000005436:Q43R	chr15:65425992	PDCD7	PDCD7:ENST00000204549.4:exon1:c.A128G:p.Q43R	0.0329171	0.276596	0.243679	2.29295e-08	Human biased
chr1:163170163	ENSSSCG00000004926:PDCD7	ENSSSCG00000004926:ENSSSCT00000005436:Q18R	chr15:65426067	PDCD7	PDCD7:ENST00000204549.4:exon1:c.A53G:p.Q18R	0.210566	0.280702	0.0701357	0.0960959	Unbiased
chr1:166579165	ENSSSCG00000004962:CORO2B	-	chr15:68986741	CORO2B	-	0.4	0.6	0.2	0.608392	Unbiased
chr1:177528315	-	-	chr14:48067434	MDGA2	-	0.0465549	0.166667	0.120112	0.0563915	Unbiased
chr1:177528363	-	-	chr14:48067484	MDGA2	-	0.00729927	0.125	0.117701	0.0026581	Unbiased
chr1:179543356	ENSSSCG00000032489:KLHDC1	-	chr14:50167749	KLHDC1	-	0.00588235	0.666667	0.660784	3.79812e-07	Human biased
chr1:179543388	ENSSSCG00000032489:KLHDC1	-	chr14:50167782	KLHDC1	-	0.0459459	0.8	0.754054	3.55526e-05	Human biased
chr1:180558681	-	-	chr14:51266610	NIN	-	0.0880952	0.3	0.211905	0.0565362	Unbiased
chr1:180558682	-	-	chr14:51266611	NIN	-	0.2	0.277778	0.0777778	0.382367	Unbiased
chr1:184403853	ENSSSCG00000005054:MAPK1IP1L	-	chr14:55520956	MAPK1IP1L	-	0.486842	0.857143	0.370301	0.110738	Unbiased
chr1:186922131	-	-	chr14:58300217	SLC35F4	-	0.030303	0.0909091	0.0606061	0.557233	Unbiased
chr1:188583167	-	-	chr14:59932691	GPR135	-	0.156566	0.166667	0.010101	1	Unbiased
chr1:209201759	ENSSSCG00000005191:MPDZ	-	chr9:13259909	MPDZ	-	0.266129	0.2	-0.066129	1	Unbiased
chr1:246661248	ENSSSCG00000005425:SLC44A1	-	chr9:108100835	SLC44A1	-	0.0538462	0.2	0.146154	0.26671	Unbiased
chr1:250195288	ENSSSCG00000038824:FRRS1L	-	chr9:111900885	FRRS1L	-	0	0.0571429	0.0571429	1	Unbiased
chr1:250208861	ENSSSCG00000038824:FRRS1L	-	chr9:111918176	FRRS1L	-	0.419006	0.393939	-0.0250671	0.856174	Unbiased
chr1:264500477	ENSSSCG00000005585:DENND1A	-	chr9:126361780	DENND1A	-	0.0786517	0.5	0.421348	0.168987	Unbiased
chr1:264500525	ENSSSCG00000005585:DENND1A	-	chr9:126361828	DENND1A	-	0.0929204	0.4	0.30708	0.0788944	Unbiased
chr1:265999826	ENSSSCG00000005602:GAPVD1	-	chr9:128098325	GAPVD1	-	0.134615	0.222222	0.0876068	0.609449	Unbiased
chr1:266145172	ENSSSCG00000029169:MAPKAP1	-	chr9:128252639	MAPKAP1	-	0.0465116	1	0.953488	0.00298983	Human biased
chr1:268764115	ENSSSCG00000005646:COQ4	-	chr9:131092597	COQ4	-	0.122517	0.235294	0.112778	0.0215506	Unbiased
chr1:268764160	ENSSSCG00000005646:COQ4	-	chr9:131092632	COQ4	-	0.118182	0.107143	-0.011039	1	Unbiased
chr1:269412951	ENSSSCG00000005671:CRAT,ENSSSCG00000005672:PTPA	-	chr9:131888216	PPP2R4	-	0.243243	1	0.756757	0.253333	Unbiased
chr10:12078406	ENSSSCG00000010840:RGS7	-	chr1:241180709	RGS7	-	0.16	0.75	0.59	0.0338933	Unbiased
chr10:12201505	ENSSSCG00000010840:RGS7	-	chr1:241402390	RGS7	-	0.327586	0.285714	-0.0418719	1	Unbiased
chr10:14916902	ENSSSCG00000010862:CDC42BPA	-	chr1:227481293	CDC42BPA	-	0.192503	0.5	0.307497	0.170369	Unbiased
chr10:18786717	ENSSSCG00000022034:SMYD3	-	chr1:246452244	SMYD3	-	0.1	0.5	0.4	0.214701	Unbiased
chr10:47462314	-	-	chr10:14296669	FRMD4A	-	0.0379581	0.125	0.0870419	0.272804	Unbiased
chr11:522090	ENSSSCG00000009569:PSPC1	-	chr13:20293573	PSPC1	-	0.128342	0.108108	-0.0202341	0.716556	Unbiased
chr11:15707091	ENSSSCG00000035658:ENSSSCG00000035658	-	chr13:52992678	VPS36	-	0.032	1	0.968	0.0345745	Unbiased
chr11:39186899	ENSSSCG00000031599:ENSSSCG00000031599	-	chr13:67551913	PCDH9-AS3	-	0.0370146	0.192308	0.155293	0.00282773	Unbiased
chr11:39258139	-	-	chr13:67615863	PCDH9	-	0.0714722	0.131579	0.0601067	0.192315	Unbiased
chr11:39379500	ENSSSCG00000038842:PCDH9	-	chr13:67727366	PCDH9	-	0.113636	0.208861	0.0952244	0.00125881	Unbiased
chr11:39379514	ENSSSCG00000038842:PCDH9	-	chr13:67727377	PCDH9	-	0.110973	0.142857	0.0318846	0.293324	Unbiased
chr11:39379523	ENSSSCG00000038842:PCDH9	-	chr13:67727386	PCDH9	-	0.0296156	0.625767	0.596151	3.33006e-84	Human biased
chr12:13557393	ENSSSCG00000017272:HELZ	-	chr17:65130414	HELZ	-	0	0.666667	0.666667	0.0384615	Unbiased
chr12:13782692	-	-	chr17:65424576	PITPNC1	-	0.226054	0.666667	0.440613	0.132302	Unbiased
chr12:13802563	-	-	chr17:65450316	PITPNC1	-	0.0296378	1	0.970362	0.000975193	Human biased
chr12:14007762	ENSSSCG00000017274:PITPNC1	-	chr17:65679832	PITPNC1	-	0.00965251	0.5	0.490347	2.52863e-05	Human biased
chr12:18814182	ENSSSCG00000017357:ITGA2B	-	chr17:42521261	GPATCH8	-	0.028754	0.175	0.146246	0.000356661	Unbiased
chr12:18814260	ENSSSCG00000017357:ITGA2B	-	chr17:42521195	GPATCH8	-	0.0218471	0.125	0.103153	0.051817	Unbiased
chr12:18814274	ENSSSCG00000017357:ITGA2B	-	chr17:42521181	GPATCH8	-	0.182426	0.111111	-0.0713149	0.452327	Unbiased
chr12:19155580	ENSSSCG00000017371:TMEM101	-	chr17:42110872	U3,LSM12	-	0.111111	0.636364	0.525253	0.000425839	Human biased
chr12:24199758	ENSSSCG00000032782:PNPO	-	chr17:46025034	RP11-6N17.6,RP11-6N17.9	-	0.511966	0.0235294	-0.488436	6.58423e-23	Pig biased
chr12:24199880	ENSSSCG00000032782:PNPO	-	chr17:46025242	RP11-6N17.6,RP11-6N17.9	-	0.0334821	0.0202206	-0.0132616	0.128067	Unbiased
chr12:26547530	ENSSSCG00000039259:ENSSSCG00000039259	-	chr17:66138018	LRRC37A16P	-	0.152542	0.25	0.0974576	0.508407	Unbiased
chr12:27481587	ENSSSCG00000017592:MBTD1	-	chr17:49285818	MBTD1	-	0.261905	0.8	0.538095	0.0304334	Unbiased
chr12:34246815	ENSSSCG00000017623:VEZF1	-	chr17:56049824	CUEDC1,VEZF1	-	0.601587	0.343264	-0.258323	5.13545e-22	Pig biased
chr12:34246816	ENSSSCG00000017623:VEZF1	-	chr17:56049825	CUEDC1,VEZF1	-	0.154093	0.151049	-0.00304415	0.879154	Unbiased
chr12:34246820	ENSSSCG00000017623:VEZF1	-	chr17:56049829	CUEDC1,VEZF1	-	0.0841248	0.36162	0.277495	9.5829e-45	Human biased
chr12:35076073	ENSSSCG00000038932:PPM1E	-	chr17:56856617	PPM1E	-	0.0584112	0.4	0.341589	0.0333548	Unbiased
chr12:35076320	ENSSSCG00000038932:PPM1E	-	chr17:56856786	PPM1E	-	0.00847458	0.4	0.391525	0.00153011	Human biased
chr12:35314772	ENSSSCG00000023727:TRIM37	-	chr17:57117351	TRIM37	-	0.0881612	1	0.911839	0.0083878	Human biased
chr12:43629849	ENSSSCG00000017748:NF1	-	chr2:61564788	USP34	-	0.4	0.777778	0.377778	0.169802	Unbiased
chr12:44410166	ENSSSCG00000017756:NLK	-	chr17:26375487	NLK	-	0.0551416	0.240642	0.1855	4.09216e-12	Unbiased
chr12:44855233	-	-	chr17:26936879	SPAG5-AS1	-	0.182796	0.528736	0.34594	1.35103e-09	Human biased
chr12:44855248	-	-	chr17:26936898	SPAG5-AS1	-	0.490272	0.905405	0.415133	1.53674e-12	Human biased
chr12:44977479	ENSSSCG00000032658:TRAF4	-	chr17:27072836	AC010761.9	-	0	0.578125	0.578125	0.000143282	Human biased
chr12:45168485	ENSSSCG00000017779:PHF12	-	chr17:27271634	RP11-20B24.5	-	0.019802	0.363636	0.343834	0.000716276	Human biased
chr12:47596347	-	-	chr17:1243656	TUSC5,YWHAE	-	0.0571705	0.4	0.342829	0.0303446	Unbiased
chr12:48139371	ENSSSCG00000039780:RTN4RL1	-	chr17:1924372	CTD-2545H1.1	-	0.2	0.4	0.2	0.102542	Unbiased
chr12:53126165	ENSSSCG00000021363:CHD3	-	chr17:7772599	LSMD1	-	0.2	0.333333	0.133333	0.659247	Unbiased
chr12:54380153	ENSSSCG00000034964:STX8	-	chr17:9260986	STX8	-	0.119048	0.5	0.380952	0.240766	Unbiased
chr13:2639980	ENSSSCG00000011190:METTL6	-	chr3:15454240	METTL6	-	0.0171958	0.247619	0.230423	2.01716e-16	Human biased
chr13:21762047	ENSSSCG00000027738:LRRFIP2	-	chr3:37126157	LRRFIP2	-	0.0709677	0.571429	0.500461	0.00145438	Human biased
chr13:27331937	-	-	chr3:44048310	RP4-555D20.4,RNU6-367P	-	0.0207497	0.105263	0.0845135	0.0626097	Unbiased
chr13:32317120	ENSSSCG00000011390:IP6K1	-	chr3:49818562	IP6K1	-	0.146032	0.5	0.353968	0.108997	Unbiased
chr13:35881911	ENSSSCG00000011455:CACNA1D	-	chr3:53817038	CACNA1D	-	0.279503	0.285714	0.00621118	1	Unbiased
chr13:35884880	ENSSSCG00000011455:CACNA1D	ENSSSCG00000011455:ENSSSCT00000012536:I1660M	chr3:53820892	CACNA1D	CACNA1D:ENST00000540742.1:exon14:c.A1512G:p.I504M,CACNA1D:ENST00000422281.2:exon39:c.A4791G:p.I1597M,CACNA1D:ENST00000350061.5:exon40:c.A4836G:p.I1612M,CACNA1D:ENST00000288139.4:exon41:c.A4896G:p.I1632M	0.229376	0.316633	0.087257	0.00013291	Unbiased
chr13:39922407	ENSSSCG00000011471:FLNB	ENSSSCG00000011471:ENSSSCT00000012553:Q2243R;ENSSSCG00000011471:ENSSSCT00000040435:Q2327R;ENSSSCG00000011471:ENSSSCT00000044709:Q2303R;ENSSSCG00000011471:ENSSSCT00000064169:Q2296R	chr3:58141801	FLNB	FLNB:ENST00000493452.1:exon39:c.A6308G:p.Q2103R,FLNB:ENST00000348383.5:exon40:c.A6764G:p.Q2255R,FLNB:ENST00000358537.3:exon40:c.A6815G:p.Q2272R,FLNB:ENST00000419752.2:exon40:c.A6347G:p.Q2116R,FLNB:ENST00000295956.4:exon41:c.A6887G:p.Q2296R,FLNB:ENST00000429972.2:exon41:c.A6854G:p.Q2285R,FLNB:ENST00000490882.1:exon42:c.A6980G:p.Q2327R	0.287088	0.097629	-0.189459	3.34657e-29	Unbiased
chr13:40073087	ENSSSCG00000035452:HTD2	-	chr3:58304162	RPP14	-	0.0361217	0.0652174	0.0290957	0.158209	Unbiased
chr13:40073139	ENSSSCG00000035452:HTD2	-	chr3:58304278	RPP14	-	0.0271335	0.0983213	0.0711879	8.2906e-10	Unbiased
chr13:40073242	ENSSSCG00000035452:HTD2	-	chr3:58304471	RPP14	-	0.0273224	0.05	0.0226776	0.125031	Unbiased
chr13:43254051	-	-	chr3:61668448	PTPRG	-	0.454545	0.375	-0.0795455	1	Unbiased
chr13:44008173	ENSSSCG00000011489:CADPS	-	chr3:62413208	CADPS	-	0.127334	0.1	-0.0273345	1	Unbiased
chr13:44008174	ENSSSCG00000011489:CADPS	-	chr3:62413209	CADPS	-	0.290657	0.21875	-0.0719074	0.429688	Unbiased
chr13:44008187	ENSSSCG00000011489:CADPS	-	chr3:62413216	CADPS	-	0.0439771	0.1	0.0560229	0.233443	Unbiased
chr13:44008194	ENSSSCG00000011489:CADPS	-	chr3:62413223	CADPS	-	0.157095	0.555556	0.398461	1.65354e-07	Human biased
chr13:44010385	ENSSSCG00000011489:CADPS	-	chr3:62414576	CADPS	-	0.410526	0.185185	-0.225341	0.00220665	Pig biased
chr13:44018577	ENSSSCG00000011489:CADPS	-	chr3:62422421	CADPS	-	0.156309	0.2	0.0436911	0.575035	Unbiased
chr13:44020000	ENSSSCG00000011489:CADPS	ENSSSCG00000011489:ENSSSCT00000012572:E1267G;ENSSSCG00000011489:ENSSSCT00000044538:E1242G;ENSSSCG00000011489:ENSSSCT00000066159:E1251G	chr3:62423807	CADPS	CADPS:ENST00000357948.3:exon25:c.A3512G:p.E1171G,CADPS:ENST00000283269.9:exon26:c.A3632G:p.E1211G,CADPS:ENST00000383710.4:exon28:c.A3749G:p.E1250G	0.352923	0.196571	-0.156352	4.96233e-56	Unbiased
chr13:44087221	ENSSSCG00000011489:CADPS	-	chr3:62487073	CADPS	-	0.0800439	0.25	0.169956	0.0205862	Unbiased
chr13:44087315	ENSSSCG00000011489:CADPS	-	chr3:62487166	CADPS	-	0.0589005	0.75	0.691099	1.84213e-23	Human biased
chr13:44087317	ENSSSCG00000011489:CADPS	-	chr3:62487168	CADPS	-	0.0165975	0.148148	0.131551	0.00180976	Unbiased
chr13:44087318	ENSSSCG00000011489:CADPS	-	chr3:62487169	CADPS	-	0.0174263	0.125	0.107574	0.0114266	Unbiased
chr13:44087784	ENSSSCG00000011489:CADPS	-	chr3:62487627	CADPS	-	0.0512821	0.681818	0.630536	1.35923e-10	Human biased
chr13:44481409	ENSSSCG00000011489:CADPS	ENSSSCG00000011489:ENSSSCT00000012572:S92G;ENSSSCG00000011489:ENSSSCT00000044538:S92G;ENSSSCG00000011489:ENSSSCT00000066159:S92G	chr3:62860434	CADPS	CADPS:ENST00000283269.9:exon1:c.A271G:p.S91G,CADPS:ENST00000357948.3:exon1:c.A271G:p.S91G,CADPS:ENST00000383710.4:exon1:c.A271G:p.S91G,CADPS:ENST00000490353.2:exon1:c.A271G:p.S91G	0.145691	0.125	-0.0206908	1	Unbiased
chr13:49625935	-	-	chr3:68231161	FAM19A1	-	0.0303951	0.105263	0.074868	0.1198	Unbiased
chr13:52967102	ENSSSCG00000027675:ENSSSCG00000027675	-	chr3:71625726	FOXP1	-	0.272727	1	0.727273	0.333333	Unbiased
chr13:52968772	ENSSSCG00000027675:ENSSSCG00000027675	-	chr3:71627443	FOXP1	-	0.0909091	0.6	0.509091	0.0631868	Unbiased
chr13:52968778	ENSSSCG00000027675:ENSSSCG00000027675	-	chr3:71627449	FOXP1	-	0.272727	0.666667	0.393939	0.505495	Unbiased
chr13:53081395	-	-	chr3:71729589	EIF4E3	-	0.256684	0.119658	-0.137026	0.000524802	Unbiased
chr13:63348738	-	-	chr3:6941299	GRM7	-	0.0261261	0.5	0.473874	4.06686e-05	Human biased
chr13:69433108	ENSSSCG00000036643:ENSSSCG00000036643	-	chr3:15113852	ZFYVE20	-	0.00723589	0.0137931	0.00655721	0.294679	Unbiased
chr13:80224932	ENSSSCG00000011662:COPB2,ENSSSCG00000035771:MRPS22	-	chr3:139072534	MRPS22	-	0.203187	0.142857	-0.0603301	1	Unbiased
chr13:80226718	ENSSSCG00000011662:COPB2,ENSSSCG00000035771:MRPS22	-	chr3:139074203	MRPS22	-	0.252443	0.0171429	-0.2353	2.03099e-15	Pig biased
chr13:80226719	ENSSSCG00000011662:COPB2,ENSSSCG00000035771:MRPS22	-	chr3:139074204	MRPS22	-	0.0425197	0.0123457	-0.030174	0.353918	Unbiased
chr13:80226720	ENSSSCG00000011662:COPB2,ENSSSCG00000035771:MRPS22	-	chr3:139074205	MRPS22	-	0.0169231	0.0415822	0.0246591	0.00574982	Unbiased
chr13:82951918	ENSSSCG00000011677:GK5	-	chr3:141882641	GK5	-	0.6	0.321429	-0.278571	0.0786616	Unbiased
chr13:82951964	ENSSSCG00000011677:GK5	-	chr3:141882672	GK5	-	0	0.880952	0.880952	1.80405e-08	Human biased
chr13:82985229	ENSSSCG00000011677:GK5	-	chr3:141903621	GK5	-	0	0.0706522	0.0706522	0.621542	Unbiased
chr13:92583998	ENSSSCG00000011720:MBNL1	-	chr3:152056390	MBNL1	-	0.028169	0.210526	0.182357	0.00244577	Unbiased
chr13:99218019	-	-	chr3:159165938	IQCJ-SCHIP1	-	0.0636704	0.2	0.13633	0.0474572	Unbiased
chr13:99218021	-	-	chr3:159165940	IQCJ-SCHIP1	-	0.0824373	0.129032	0.046595	0.328532	Unbiased
chr13:109034363	ENSSSCG00000011746:SKIL	-	chr3:170080492	SKIL	-	0.0818182	0.333333	0.251515	0.235412	Unbiased
chr13:109034395	ENSSSCG00000011746:SKIL	-	chr3:170080524	SKIL	-	0.306818	0.333333	0.0265152	1	Unbiased
chr13:117427237	ENSSSCG00000039285:MFN1	-	chr3:179090559	MFN1	-	0.130736	0.360465	0.229729	2.35601e-07	Human biased
chr13:117429056	ENSSSCG00000039285:MFN1	ENSSSCG00000039285:ENSSSCT00000039446:I328V	chr3:179093014	MFN1	MFN1:ENST00000263969.5:exon9:c.A982G:p.I328V,MFN1:ENST00000280653.7:exon10:c.A982G:p.I328V,MFN1:ENST00000471841.1:exon10:c.A982G:p.I328V	0.0868347	0.194099	0.107265	6.1416e-15	Unbiased
chr13:118846951	ENSSSCG00000011769:FXR1	-	chr3:180639107	FXR1	-	0.0467836	0.222222	0.175439	0.0812611	Unbiased
chr13:118884236	ENSSSCG00000011769:FXR1	-	chr3:180679085	FXR1	-	0.0240074	0.666667	0.642659	6.78584e-06	Human biased
chr13:120993945	ENSSSCG00000025942:MCCC1	-	chr3:182744295	MCCC1	-	0.3	0.596154	0.296154	0.0966419	Unbiased
chr13:132317633	ENSSSCG00000031147:ACAP2	-	chr3:195045436	ACAP2	-	0.0217177	0.2	0.178282	0.108179	Unbiased
chr13:142545920	-	-	chr3:117293482	LSAMP	-	0.0322181	0.222222	0.190004	0.000328641	Unbiased
chr13:170481772	-	-	chr3:85308837	CADM2	-	0.196704	0.0172414	-0.179463	9.45085e-05	Unbiased
chr13:181302494	ENSSSCG00000019839:ENSSSCG00000019839	-	chr21:17911421	MIR99A	-	0.181818	0.444444	0.262626	0.335913	Unbiased
chr13:185308610	-	-	chr21:22516546	NCAM2	-	0.0412466	0.3125	0.271253	0.000460854	Human biased
chr13:185308646	-	-	chr21:22516579	NCAM2	-	0.0194986	0.103448	0.0839497	0.0209862	Unbiased
chr13:192928420	ENSSSCG00000025119:GRIK1	-	chr21:30953679	GRIK1	-	0.032967	0.315789	0.282822	0.000206744	Human biased
chr13:192928421	ENSSSCG00000025119:GRIK1	-	chr21:30953680	GRIK1	-	0.465116	0.583333	0.118217	0.289651	Unbiased
chr13:192928491	ENSSSCG00000025119:GRIK1	ENSSSCG00000025119:ENSSSCT00000028121:Q636R;ENSSSCG00000025119:ENSSSCT00000045911:Q621R;ENSSSCG00000025119:ENSSSCT00000055117:Q621R;ENSSSCG00000025119:ENSSSCT00000055366:Q621R	chr21:30953750	GRIK1	GRIK1:ENST00000389125.3:exon12:c.A1862G:p.Q621R,GRIK1:ENST00000399909.1:exon12:c.A1862G:p.Q621R,GRIK1:ENST00000399914.1:exon12:c.A1862G:p.Q621R,GRIK1:ENST00000327783.4:exon13:c.A1907G:p.Q636R,GRIK1:ENST00000389124.2:exon13:c.A1907G:p.Q636R,GRIK1:ENST00000399907.1:exon13:c.A1907G:p.Q636R,GRIK1:ENST00000399913.1:exon13:c.A1907G:p.Q636R,GRIK1:ENST00000309434.7:exon14:c.A1913G:p.Q638R,GRIK1:ENST00000…	0.280352	0.659193	0.378841	2.92816e-64	Human biased
chr13:197168371	ENSSSCG00000023674:SON	ENSSSCG00000023674:ENSSSCT00000026483:T274A;ENSSSCG00000023674:ENSSSCT00000060699:T413A;ENSSSCG00000023674:ENSSSCT00000063351:T413A;ENSSSCG00000023674:ENSSSCT00000065483:T413A	chr21:34922801	SON	SON:ENST00000290239.6:exon3:c.A1264G:p.T422A,SON:ENST00000300278.4:exon3:c.A1264G:p.T422A,SON:ENST00000356577.4:exon3:c.A1264G:p.T422A,SON:ENST00000381679.4:exon3:c.A1264G:p.T422A	0.0375134	0.133896	0.0963829	8.05901e-27	Unbiased
chr13:197168826	ENSSSCG00000023674:SON	ENSSSCG00000023674:ENSSSCT00000026483:P425P;ENSSSCG00000023674:ENSSSCT00000060699:P564P;ENSSSCG00000023674:ENSSSCT00000063351:P564P;ENSSSCG00000023674:ENSSSCT00000065483:P564P	chr21:34923256	SON	SON:ENST00000290239.6:exon3:c.A1719G:p.P573P,SON:ENST00000300278.4:exon3:c.A1719G:p.P573P,SON:ENST00000356577.4:exon3:c.A1719G:p.P573P,SON:ENST00000381679.4:exon3:c.A1719G:p.P573P	0.0979644	0.130841	0.0328767	0.0661338	Unbiased
chr13:197168845	ENSSSCG00000023674:SON	ENSSSCG00000023674:ENSSSCT00000026483:R432G;ENSSSCG00000023674:ENSSSCT00000060699:R571G;ENSSSCG00000023674:ENSSSCT00000063351:R571G;ENSSSCG00000023674:ENSSSCT00000065483:R571G	chr21:34923275	SON	SON:ENST00000290239.6:exon3:c.A1738G:p.R580G,SON:ENST00000300278.4:exon3:c.A1738G:p.R580G,SON:ENST00000356577.4:exon3:c.A1738G:p.R580G,SON:ENST00000381679.4:exon3:c.A1738G:p.R580G	0.398167	0.169697	-0.22847	6.10565e-26	Pig biased
chr13:197174856	ENSSSCG00000023674:SON	-	chr21:34929694	SON	-	0.173913	0.2	0.026087	0.750364	Unbiased
chr13:207750347	ENSSSCG00000012089:ADARB1	-	chr21:46595607	ADARB1	-	0.655582	0.2	-0.455582	0.0528436	Unbiased
chr13:207750360	ENSSSCG00000012089:ADARB1	-	chr21:46595620	ADARB1	-	0.0266075	0.285714	0.259107	0.000766929	Human biased
chr13:207750361	ENSSSCG00000012089:ADARB1	-	chr21:46595621	ADARB1	-	0.609195	0.172414	-0.436782	2.18813e-10	Pig biased
chr14:9274947	ENSSSCG00000009650:DOCK5	-	chr8:25118445	DOCK5	-	0	0.6	0.6	0.0178571	Unbiased
chr14:14087712	ENSSSCG00000009693:XKR6	ENSSSCG00000009693:ENSSSCT00000010628:R296G;ENSSSCG00000009693:ENSSSCT00000041874:R385G;ENSSSCG00000009693:ENSSSCT00000054615:R389G;ENSSSCG00000009693:ENSSSCT00000065812:R382G	chr8:10755755	XKR6	XKR6:ENST00000304437.2:exon3:c.A796G:p.R266G,XKR6:ENST00000416569.2:exon3:c.A1633G:p.R545G	0.558673	0.302326	-0.256348	0.00193552	Pig biased
chr14:17454743	-	-	chr4:173407574	GALNTL6	-	0.198276	0.25	0.0517241	1	Unbiased
chr14:17532354	-	-	chr4:173351863	GALNTL6	-	0.0164384	0.5	0.483562	0.00242071	Human biased
chr14:32759703	ENSSSCG00000009834:ATXN2	-	chr12:112021790	ATXN2	-	0.0236967	0.416667	0.39297	1.16734e-05	Human biased
chr14:33686552	ENSSSCG00000009845:SRRM4	-	chr12:119565846	SRRM4	-	0	0.25	0.25	0.102058	Unbiased
chr14:35019005	ENSSSCG00000009855:KSR2	-	chr12:117969978	KSR2	-	0.166667	0.3	0.133333	0.62406	Unbiased
chr14:36105128	ENSSSCG00000009864:MED13L	-	chr12:116672275	MED13L	-	0.0755467	0.0714286	-0.00411815	1	Unbiased
chr14:36107851	ENSSSCG00000009864:MED13L	-	chr12:116670808	MED13L	-	0.186916	0.25	0.0630841	0.648004	Unbiased
chr14:36117005	ENSSSCG00000009864:MED13L	-	chr12:116661462	MED13L	-	0.45209	0.166667	-0.285423	0.0766046	Unbiased
chr14:40042308	ENSSSCG00000009896:BICDL1	-	chr12:120455905	CCDC64	-	0.145161	0.866667	0.721505	2.14411e-07	Human biased
chr14:42498855	ENSSSCG00000039261:WSCD2	-	chr12:108634610	WSCD2	-	0.1	0.666667	0.566667	0.0357143	Unbiased
chr14:43331266	ENSSSCG00000009956:GRK3	-	chr22:25998301	ADRBK2	-	0.6	0.25	-0.35	0.314685	Unbiased
chr14:47727496	ENSSSCG00000010015:OSBP2	-	chr22:31292704	OSBP2	-	0.111111	0.6	0.488889	1.28699e-10	Human biased
chr14:47727506	ENSSSCG00000010015:OSBP2	-	chr22:31292714	OSBP2	-	0.134615	0.1	-0.0346154	1	Unbiased
chr14:47727518	ENSSSCG00000010015:OSBP2	-	chr22:31292735	OSBP2	-	0.211045	0.208333	-0.00271203	1	Unbiased
chr14:47727536	ENSSSCG00000010015:OSBP2	-	chr22:31292766	OSBP2	-	0.567376	0.8	0.232624	0.396825	Unbiased
chr14:47727552	ENSSSCG00000010015:OSBP2	-	chr22:31292782	OSBP2	-	0.0304762	0.5	0.469524	4.40812e-08	Human biased
chr14:49312253	ENSSSCG00000010052:BCR	-	chr22:23649339	BCR	-	0.216216	0.333333	0.117117	0.610698	Unbiased
chr14:51473632	ENSSSCG00000010135:DGCR8,ENSSSCG00000029742:ENSSSCG00000029742	-	chr22:20073330	MIR3618	-	0.159905	0.142857	-0.0170474	1	Unbiased
chr14:55940197	ENSSSCG00000010156:ARID4B	-	chr1:235471283	ARID4B	-	0.0854962	0.555556	0.470059	9.90468e-07	Human biased
chr14:63761966	ENSSSCG00000010212:ENSSSCG00000010212	-	chr10:62112839	ANK3	-	0.0192555	0.0869565	0.0677011	0.0824101	Unbiased
chr14:63769504	ENSSSCG00000010212:ENSSSCG00000010212	-	chr10:62119551	ANK3	-	0.0224719	0.142857	0.120385	0.0627037	Unbiased
chr14:63919442	-	-	chr10:62242318	ANK3	-	0.0154639	0.190476	0.175012	0.000890955	Unbiased
chr14:70289307	ENSSSCG00000010232:LRRTM3,ENSSSCG00000036480:CTNNA3	-	chr10:68806273	CTNNA3,LRRTM3	-	0.021875	0.0769231	0.0550481	0.256423	Unbiased
chr14:70289320	ENSSSCG00000010232:LRRTM3,ENSSSCG00000036480:CTNNA3	-	chr10:68806286	CTNNA3,LRRTM3	-	0.0100739	0.428571	0.418498	3.13915e-12	Human biased
chr14:70289327	ENSSSCG00000010232:LRRTM3,ENSSSCG00000036480:CTNNA3	-	chr10:68806293	CTNNA3,LRRTM3	-	0.0139082	0.25	0.236092	0.00585641	Human biased
chr14:70289469	ENSSSCG00000010232:LRRTM3,ENSSSCG00000036480:CTNNA3	-	chr10:68806433	CTNNA3,LRRTM3	-	0.262899	0.184211	-0.0786887	0.336308	Unbiased
chr14:70289493	ENSSSCG00000010232:LRRTM3,ENSSSCG00000036480:CTNNA3	-	chr10:68806457	CTNNA3,LRRTM3	-	0.0093985	0.0909091	0.0815106	0.116064	Unbiased
chr14:70289532	ENSSSCG00000010232:LRRTM3,ENSSSCG00000036480:CTNNA3	-	chr10:68806508	CTNNA3,LRRTM3	-	0.0126582	0.125	0.112342	0.0229354	Unbiased
chr14:70290288	ENSSSCG00000010232:LRRTM3,ENSSSCG00000036480:CTNNA3	-	chr10:68806829	CTNNA3,LRRTM3	-	0.0253623	0.538462	0.513099	4.96929e-08	Human biased
chr14:70290357	ENSSSCG00000010232:LRRTM3,ENSSSCG00000036480:CTNNA3	-	chr10:68806905	CTNNA3,LRRTM3	-	0.00801603	0.866667	0.858651	1.02212e-20	Human biased
chr14:70290359	ENSSSCG00000010232:LRRTM3,ENSSSCG00000036480:CTNNA3	-	chr10:68806907	CTNNA3,LRRTM3	-	0.0633663	0.32	0.256634	0.000217494	Human biased
chr14:70290361	ENSSSCG00000010232:LRRTM3,ENSSSCG00000036480:CTNNA3	-	chr10:68806909	CTNNA3,LRRTM3	-	0.132296	0.181818	0.0495225	0.519433	Unbiased
chr14:70290364	ENSSSCG00000010232:LRRTM3,ENSSSCG00000036480:CTNNA3	-	chr10:68806912	CTNNA3,LRRTM3	-	0.0429448	0.172414	0.129469	0.0110793	Unbiased
chr14:70290373	ENSSSCG00000010232:LRRTM3,ENSSSCG00000036480:CTNNA3	-	chr10:68806921	CTNNA3,LRRTM3	-	0.0688	0.483871	0.415071	2.68441e-09	Human biased
chr14:70290507	ENSSSCG00000010232:LRRTM3,ENSSSCG00000036480:CTNNA3	-	chr10:68807054	CTNNA3,LRRTM3	-	0.145963	0.181818	0.0358554	0.55015	Unbiased
chr14:71511787	ENSSSCG00000010239:RUFY2	-	chr10:70123127	RUFY2	-	0.103365	0.3125	0.209135	0.021368	Unbiased
chr14:71531003	ENSSSCG00000010239:RUFY2	-	chr10:70147067	RUFY2	-	0.184555	0.176471	-0.00808439	1	Unbiased
chr14:71531011	ENSSSCG00000010239:RUFY2	-	chr10:70147076	RUFY2	-	0.0332056	0.166667	0.133461	0.0634944	Unbiased
chr14:75535812	ENSSSCG00000010290:MCU	-	chr10:74474956	MCU	-	0.170213	0.221622	0.0514089	0.57201	Unbiased
chr14:76260957	ENSSSCG00000010301:PPP3CB	-	chr10:75207299	PPP3CB	-	0.0831889	0.173077	0.089888	0.0414404	Unbiased
chr14:76265220	ENSSSCG00000010301:PPP3CB	-	chr10:75211777	PPP3CB	-	0.0207337	0.833333	0.8126	2.4946e-14	Human biased
chr14:79695518	ENSSSCG00000010325:KCNMA1	-	chr10:78989996	KCNMA1	-	0.761905	0.555556	-0.206349	0.388819	Unbiased
chr14:79698676	ENSSSCG00000010325:KCNMA1	-	chr10:78991829	KCNMA1	-	0.111111	0.48	0.368889	0.00528768	Human biased
chr14:79698746	ENSSSCG00000010325:KCNMA1	-	chr10:78991899	KCNMA1	-	0.19403	0.111111	-0.0829187	1	Unbiased
chr14:80105988	ENSSSCG00000010325:KCNMA1	ENSSSCG00000010325:ENSSSCT00000056413:S11G	chr10:79397298	KCNMA1	KCNMA1:ENST00000286627.5:exon1:c.A103G:p.S35G,KCNMA1:ENST00000286628.8:exon1:c.A103G:p.S35G,KCNMA1:ENST00000354353.5:exon1:c.A103G:p.S35G,KCNMA1:ENST00000372440.1:exon1:c.A103G:p.S35G,KCNMA1:ENST00000372443.1:exon1:c.A103G:p.S35G,KCNMA1:ENST00000404771.3:exon1:c.A103G:p.S35G,KCNMA1:ENST00000404857.1:exon1:c.A103G:p.S35G,KCNMA1:ENST00000406533.3:exon1:c.A103G:p.S35G,KCNMA1:ENST00000480683.1:exon1:…	0.0218307	0.120407	0.0985759	2.32744e-49	Unbiased
chr14:83342672	-	-	chr10:83659747	NRG3	-	0.10828	0.125	0.0167197	0.60188	Unbiased
chr14:83342688	-	-	chr10:83659758	NRG3	-	0.212578	0.65	0.437422	3.77156e-05	Human biased
chr14:102843477	ENSSSCG00000036083:ENSSSCG00000036083	-	chr10:92938214	LINC00502,PCGF5	-	0.380952	0.166667	-0.214286	0.62785	Unbiased
chr14:105904650	ENSSSCG00000010485:TBC1D12	-	chr10:96263582	TBC1D12	-	0.209945	0.666667	0.456722	0.119642	Unbiased
chr14:107115951	ENSSSCG00000010494:SORBS1	-	chr10:97297684	SORBS1	-	0.059081	0.25	0.190919	0.0351355	Unbiased
chr14:108311208	ENSSSCG00000010513:ENSSSCG00000010513	-	chr10:98602529	LCOR	-	0.0140581	0.166667	0.152609	0.0863931	Unbiased
chr14:110540447	ENSSSCG00000010536:CNNM1	ENSSSCG00000010536:ENSSSCT00000011526:S237G;ENSSSCG00000010536:ENSSSCT00000050252:S237G;ENSSSCG00000010536:ENSSSCT00000055954:S237G	chr10:101089862	CNNM1	CNNM1:ENST00000356713.4:exon1:c.A718G:p.S240G,CNNM1:ENST00000370528.3:exon3:c.A505G:p.S169G,CNNM1:ENST00000446890.1:exon3:c.A505G:p.S169G	0.340159	0.216216	-0.123943	0.15417	Unbiased
chr14:111355216	ENSSSCG00000010550:CWF19L1	-	chr10:101992805	RP11-316M21.6	-	0.0209858	0.0881612	0.0671754	1.01525e-17	Unbiased
chr14:111355286	ENSSSCG00000010550:CWF19L1	-	chr10:101992843	RP11-316M21.6	-	0.0185185	0.0352113	0.0166927	0.0719892	Unbiased
chr14:111355330	ENSSSCG00000010550:CWF19L1	-	chr10:101992867	RP11-316M21.6	-	0.0163724	0.0567164	0.040344	2.29871e-08	Unbiased
chr14:112006124	ENSSSCG00000037592:SLF2	-	chr10:102681872	FAM178A	-	0.0454545	1	0.954545	3.10948e-07	Human biased
chr14:113754190	ENSSSCG00000029594:WBP1L	-	chr10:104523123	WBP1L	-	0.1	0.8	0.7	0.016983	Unbiased
chr14:113910160	ENSSSCG00000010593:CNNM2	-	chr10:104703939	CNNM2	-	0.276316	0.5	0.223684	0.47997	Unbiased
chr14:113910192	ENSSSCG00000010593:CNNM2	-	chr10:104703969	CNNM2	-	0.102941	1	0.897059	0.105134	Unbiased
chr14:113910199	ENSSSCG00000010593:CNNM2	-	chr10:104703977	CNNM2	-	0.25066	1	0.74934	0.252632	Unbiased
chr14:114080379	ENSSSCG00000010594:NT5C2	-	chr10:104865356	NT5C2	-	0.21393	1	0.78607	0.0108879	Unbiased
chr14:121345485	ENSSSCG00000035869:ENSSSCG00000035869	-	chr10:112675641	BBIP1	-	0.0757576	1	0.924242	0.0895522	Unbiased
chr14:125059427	ENSSSCG00000010651:ABLIM1	-	chr10:116494085	ABLIM1,RP11-106M7.1	-	0.0980392	0.21875	0.120711	0.0362121	Unbiased
chr14:127499273	ENSSSCG00000010669:ENSSSCG00000010669	-	chr10:119131449	PDZD8	-	0.05	0.6	0.55	0.000113808	Human biased
chr15:20920659	-	-	chr2:115466364	DPP10	-	0.443709	0.25	-0.193709	0.467415	Unbiased
chr15:20920772	-	-	chr2:115466499	DPP10	-	0.0388098	0.0909091	0.0520993	0.360262	Unbiased
chr15:20920798	-	-	chr2:115466537	DPP10	-	0.0479876	0.230769	0.182782	0.0251808	Unbiased
chr15:21172637	-	-	chr2:115678107	DPP10	-	0.0282236	0.0232558	-0.00496776	1	Unbiased
chr15:21381278	-	-	chr2:115934045	DPP10	-	0.238983	0.5	0.261017	0.155365	Unbiased
chr15:21381279	-	-	chr2:115934046	DPP10	-	0.094306	0.5	0.405694	0.0489839	Unbiased
chr15:21381289	-	-	chr2:115934056	DPP10	-	0.135593	0.2	0.0644068	0.519933	Unbiased
chr15:21381290	-	-	chr2:115934057	DPP10	-	0.210016	0.2	-0.0100162	1	Unbiased
chr15:21381303	-	-	chr2:115934070	DPP10	-	0.758419	0.4	-0.358419	0.0967159	Unbiased
chr15:21381351	-	-	chr2:115934118	DPP10	-	0.0326223	0.571429	0.538806	5.12873e-05	Human biased
chr15:21381352	-	-	chr2:115934119	DPP10	-	0.0496084	0.666667	0.617058	0.000105461	Human biased
chr15:21381761	-	-	chr2:115934443	DPP10	-	0.815931	0.772727	-0.0432038	0.580919	Unbiased
chr15:21382760	-	-	chr2:115935785	DPP10	-	0.680851	0.8125	0.131649	0.406326	Unbiased
chr15:21383037	-	-	chr2:115936206	DPP10	-	0.142241	0.214286	0.0720443	0.43726	Unbiased
chr15:21383040	-	-	chr2:115936209	DPP10	-	0.349296	0.352941	0.0036454	1	Unbiased
chr15:35226107	-	-	chr8:3816801	CSMD1	-	0.0795455	0.25	0.170455	0.0754921	Unbiased
chr15:35226175	-	-	chr8:3816939	CSMD1	-	0.0451927	0.2	0.154807	0.20803	Unbiased
chr15:38296382	ENSSSCG00000023328:GPM6A	-	chr4:176611622	GPM6A	-	0.142857	0.365854	0.222997	0.00121805	Human biased
chr15:38296525	ENSSSCG00000023328:GPM6A	-	chr4:176611765	GPM6A	-	0.165775	0.282051	0.116276	0.11199	Unbiased
chr15:59572102	ENSSSCG00000015861:WDR33	-	chr2:128518847	WDR33	-	0.0312805	0.166667	0.135386	0.018818	Unbiased
chr15:59572114	ENSSSCG00000015861:WDR33	-	chr2:128518835	WDR33	-	0.0440709	0.125	0.0809291	0.0328001	Unbiased
chr15:60377409	ENSSSCG00000015866:FMNL2	-	chr2:153498486	FMNL2	-	0.0552147	0.333333	0.278119	0.042063	Unbiased
chr15:66169157	ENSSSCG00000015880:TANC1,ENSSSCG00000035702:WDSUB1	-	chr2:160093901	WDSUB1	-	0	0.0625	0.0625	0.275862	Unbiased
chr15:66536528	ENSSSCG00000015882:BAZ2B	-	chr2:160443781	BAZ2B	-	0.0984456	0.4	0.301554	0.0882113	Unbiased
chr15:68008055	ENSSSCG00000015889:TANK	-	chr2:162053913	TANK	-	0.0625	0.695652	0.633152	8.66616e-07	Human biased
chr15:74946419	ENSSSCG00000032715:CERS6	-	chr2:169331291	CERS6	-	0.590909	0.333333	-0.257576	0.183672	Unbiased
chr15:74947904	ENSSSCG00000032715:CERS6	-	chr2:169332465	CERS6	-	0.168367	0.545455	0.377087	0.00585328	Human biased
chr15:74947908	ENSSSCG00000032715:CERS6	-	chr2:169332469	CERS6	-	0.270769	0.142857	-0.127912	0.369347	Unbiased
chr15:74947909	ENSSSCG00000032715:CERS6	-	chr2:169332470	CERS6	-	0.169231	0.0833333	-0.0858974	0.697157	Unbiased
chr15:74947915	ENSSSCG00000032715:CERS6	-	chr2:169332476	CERS6	-	0.163265	0.0909091	-0.0723562	1	Unbiased
chr15:93207012	ENSSSCG00000016033:GULP1	-	chr2:189395386	GULP1	-	0	0.666667	0.666667	0.0047619	Human biased
chr15:95565190	ENSSSCG00000016056:GLS	-	chr2:191799592	GLS	-	0.0179966	0.167197	0.149201	1.71086e-44	Unbiased
chr15:104737164	ENSSSCG00000036339:FAM126B	-	chr2:201926073	FAM126B	-	0.0742188	0.2	0.125781	0.330909	Unbiased
chr15:105394292	ENSSSCG00000016109:ALS2	-	chr2:202639940	ALS2	-	0.0625	0.333333	0.270833	0.298246	Unbiased
chr15:105394293	ENSSSCG00000016109:ALS2	-	chr2:202639941	ALS2	-	0.189189	0.285714	0.0965251	0.467223	Unbiased
chr15:105397128	ENSSSCG00000016109:ALS2	-	chr2:202641833	ALS2	-	0.0810811	0.333333	0.252252	0.0205444	Unbiased
chr15:105397136	ENSSSCG00000016109:ALS2	-	chr2:202641841	ALS2	-	0.257143	0.25	-0.00714286	1	Unbiased
chr15:105397150	ENSSSCG00000016109:ALS2	-	chr2:202641857	ALS2	-	0.148936	0.181818	0.032882	1	Unbiased
chr15:105995970	ENSSSCG00000016113:BMPR2	-	chr2:203251628	BMPR2	-	0.0714286	0.4	0.328571	0.0805906	Unbiased
chr15:106580358	ENSSSCG00000016118:CYP20A1	-	chr2:203960111	NBEAL1	-	0.137615	1	0.862385	0.0222768	Unbiased
chr15:106950641	ENSSSCG00000016119:ENSSSCG00000016119	-	chr2:204349153	RAPH1	-	0.019037	0.7	0.680963	4.16199e-10	Human biased
chr15:106950658	ENSSSCG00000016119:ENSSSCG00000016119	-	chr2:204349170	RAPH1	-	0.0234467	0.5625	0.539053	1.32204e-10	Human biased
chr15:106951975	ENSSSCG00000016119:ENSSSCG00000016119	-	chr2:204350561	RAPH1	-	0.0317583	0.5	0.468242	0.000679333	Human biased
chr15:106952006	ENSSSCG00000016119:ENSSSCG00000016119	-	chr2:204350591	RAPH1	-	0.113854	1	0.886146	2.09669e-05	Human biased
chr15:110909564	ENSSSCG00000024696:ENSSSCG00000024696	-	chr2:208619252	CCNYL1	-	0.0145015	0.0666667	0.0521652	2.82991e-05	Unbiased
chr15:110909904	ENSSSCG00000024696:ENSSSCG00000024696	-	chr19:28476675	LLNLF-65H9.1	-	0.0145149	0.2	0.185485	0.0100647	Unbiased
chr15:110909912	ENSSSCG00000024696:ENSSSCG00000024696	-	chr19:28476684	LLNLF-65H9.1	-	0.0863531	0.222222	0.135869	0.181746	Unbiased
chr15:110909917	ENSSSCG00000024696:ENSSSCG00000024696	-	chr19:28476689	LLNLF-65H9.1	-	0.215166	0.8	0.584834	0.0091488	Human biased
chr15:110909926	ENSSSCG00000024696:ENSSSCG00000024696	-	chr19:28476703	LLNLF-65H9.1	-	0.0410959	0.692308	0.651212	5.50945e-10	Human biased
chr15:110909979	ENSSSCG00000024696:ENSSSCG00000024696	-	chr19:28476750	LLNLF-65H9.1	-	0.721698	0.318182	-0.403516	0.000380268	Pig biased
chr15:110910214	ENSSSCG00000024696:ENSSSCG00000024696	-	chr19:28476943	LLNLF-65H9.1,CTD-2043I16.1	-	0.384615	0.666667	0.282051	0.55	Unbiased
chr15:110910350	ENSSSCG00000024696:ENSSSCG00000024696	-	chr19:28477037	LLNLF-65H9.1,CTD-2043I16.1	-	0.170124	0.5	0.329876	0.0205534	Unbiased
chr15:110910352	ENSSSCG00000024696:ENSSSCG00000024696	-	chr19:28477039	LLNLF-65H9.1,CTD-2043I16.1	-	0.26455	0.772727	0.508177	4.60344e-06	Human biased
chr15:110910482	ENSSSCG00000024696:ENSSSCG00000024696	-	chr2:208620129	CCNYL1	-	0.0856672	0.0764192	-0.009248	0.619544	Unbiased
chr15:110910487	ENSSSCG00000024696:ENSSSCG00000024696	-	chr2:208620134	CCNYL1	-	0.0729537	0.0351562	-0.0377975	0.0255846	Unbiased
chr15:112686617	ENSSSCG00000016153:UNC80	-	chr2:210835066	UNC80	-	0.0951157	0.353535	0.25842	3.00138e-09	Human biased
chr15:112687180	ENSSSCG00000016153:UNC80	ENSSSCG00000016153:ENSSSCT00000017586:S2662G;ENSSSCG00000016153:ENSSSCT00000030483:S2730G	chr2:210835613	UNC80	UNC80:ENST00000539183.1:exon4:c.A328G:p.S110G,UNC80:ENST00000272845.6:exon53:c.A7975G:p.S2659G,UNC80:ENST00000439458.1:exon53:c.A7990G:p.S2664G	0.264587	0.13202	-0.132567	3.15887e-25	Unbiased
chr15:112687550	ENSSSCG00000016153:UNC80	-	chr2:210835985	UNC80	-	0.248336	0.608333	0.359997	5.81019e-16	Human biased
chr15:118296733	ENSSSCG00000022758:PECR	-	chr2:216903561	PECR	-	0.182653	0.164706	-0.0179472	0.665353	Unbiased
chr15:118296837	ENSSSCG00000022758:PECR	-	chr2:216903629	PECR	-	0.0141343	0.111111	0.0969768	0.0349007	Unbiased
chr16:4244227	ENSSSCG00000016784:ANKH	-	chr5:14847030	ANKH	-	0.0224599	1	0.97754	0.000576946	Human biased
chr16:4244228	ENSSSCG00000016784:ANKH	-	chr5:14847031	ANKH	-	0.0117073	0.666667	0.654959	0.000513132	Human biased
chr16:24140877	ENSSSCG00000016853:RICTOR,ENSSSCG00000016855:FYB1	ENSSSCG00000016853:ENSSSCT00000018353:R1391G;ENSSSCG00000016853:ENSSSCT00000040125:R1239G;ENSSSCG00000016853:ENSSSCT00000056502:R1448G;ENSSSCG00000016853:ENSSSCT00000064221:R1391G	chr5:38949495	RICTOR	RICTOR:ENST00000296782.5:exon32:c.A4171G:p.R1391G	0.0195675	0.1875	0.167933	8.2743e-18	Unbiased
chr16:24141065	ENSSSCG00000016853:RICTOR,ENSSSCG00000016855:FYB1	-	chr5:38949678	RICTOR	-	0.0262467	0.444444	0.418198	0.000119637	Human biased
chr16:38307379	ENSSSCG00000016929:PDE4D	-	chr5:58717873	PDE4D	-	0.119048	0.6	0.480952	0.016214	Unbiased
chr16:38307562	ENSSSCG00000016929:PDE4D	-	chr5:58717925	PDE4D	-	0.16129	0.357143	0.195853	0.132779	Unbiased
chr16:38307584	ENSSSCG00000016929:PDE4D	-	chr5:58717947	PDE4D	-	0.666667	0.380952	-0.285714	0.03837	Unbiased
chr16:38307606	ENSSSCG00000016929:PDE4D	-	chr5:58717969	PDE4D	-	0.0754717	0.444444	0.368973	0.00528941	Human biased
chr16:38307617	ENSSSCG00000016929:PDE4D	-	chr5:58717979	PDE4D	-	0.394737	0.8	0.405263	0.160098	Unbiased
chr16:38308863	ENSSSCG00000016929:PDE4D	-	chr5:58719128	PDE4D	-	0.266667	0.454545	0.187879	0.27964	Unbiased
chr16:40286422	ENSSSCG00000025194:ZSWIM6	-	chr5:60820998	ZSWIM6	-	0.181818	0.6	0.418182	0.0913043	Unbiased
chr16:45164146	ENSSSCG00000016956:MAST4	-	chr5:66091732	MAST4	-	0.625806	1	0.374194	0.0882305	Unbiased
chr17:11388484	ENSSSCG00000007031:ENSSSCG00000007031	-	chr8:42229694	POLB	-	0.166667	0.2	0.0333333	1	Unbiased
chr17:13980394	ENSSSCG00000026466:SLC23A2	-	chr20:4950345	SLC23A2	-	0.136364	0.777778	0.641414	0.00129737	Human biased
chr17:17051527	-	-	chr20:8151048	PLCB1	-	0.0992063	0.291667	0.19246	0.0120365	Unbiased
chr17:17686976	ENSSSCG00000007056:PLCB1	-	chr20:8800373	PLCB1	-	0.0984456	0.266667	0.168221	0.0679654	Unbiased
chr17:26374997	ENSSSCG00000007088:ENSSSCG00000007088,ENSSSCG00000018309:ENSSSCG00000018309	-	chr20:17943427	SNORD17	-	0.0536278	0.0493827	-0.00424504	0.68683	Unbiased
chr17:31732708	-	-	chr20:3969347	RNF24	-	0.24	0.25	0.01	1	Unbiased
chr17:31852360	ENSSSCG00000007143:MAVS	-	chr20:3851549	MAVS,RP11-119B16.2	-	0.272727	0.0377358	-0.234991	0.0321754	Unbiased
chr17:35263308	ENSSSCG00000007228:HM13	-	chr20:30126775	HM13	-	0.612245	0.204545	-0.407699	7.52682e-10	Pig biased
chr17:35263355	ENSSSCG00000007228:HM13	-	chr20:30126822	HM13	-	0.253886	0.222222	-0.0316638	0.706546	Unbiased
chr17:35402756	ENSSSCG00000035357:BCL2L1	-	chr20:30296931	RP11-243J16.7	-	0.0460829	0.142857	0.0967742	0.300519	Unbiased
chr17:39475632	ENSSSCG00000007314:ENSSSCG00000007314	-	chr20:34803141	EPB41L1	-	0.121212	0.342105	0.220893	0.000844626	Human biased
chr17:40062710	ENSSSCG00000007324:SOGA1	-	chr20:35450005	SOGA1	-	0.0833333	0.2	0.116667	0.418337	Unbiased
chr17:40509602	ENSSSCG00000007334:SRC	-	chr20:36018604	SRC	-	0.223301	0.119048	-0.104253	0.0264388	Unbiased
chr17:40625064	ENSSSCG00000037248:ENSSSCG00000037248	-	chr20:36147533	BLCAP	BLCAP:ENST00000373537.2:exon2:c.A44G:p.K15R,BLCAP:ENST00000397131.1:exon2:c.A44G:p.K15R,BLCAP:ENST00000397134.1:exon2:c.A44G:p.K15R,BLCAP:ENST00000397135.1:exon2:c.A44G:p.K15R,BLCAP:ENST00000397137.1:exon2:c.A44G:p.K15R,BLCAP:ENST00000414542.2:exon3:c.A44G:p.K15R	0.258315	0.0575916	-0.200724	7.46451e-195	Pig biased
chr17:40625094	ENSSSCG00000037248:ENSSSCG00000037248	-	chr20:36147563	BLCAP	BLCAP:ENST00000373537.2:exon2:c.A14G:p.Q5R,BLCAP:ENST00000397131.1:exon2:c.A14G:p.Q5R,BLCAP:ENST00000397134.1:exon2:c.A14G:p.Q5R,BLCAP:ENST00000397135.1:exon2:c.A14G:p.Q5R,BLCAP:ENST00000397137.1:exon2:c.A14G:p.Q5R,BLCAP:ENST00000414542.2:exon3:c.A14G:p.Q5R	0.278827	0.0914798	-0.187347	1.17585e-182	Unbiased
chr17:40625103	ENSSSCG00000037248:ENSSSCG00000037248	-	chr20:36147572	BLCAP	BLCAP:ENST00000373537.2:exon2:c.A5G:p.Y2C,BLCAP:ENST00000397131.1:exon2:c.A5G:p.Y2C,BLCAP:ENST00000397134.1:exon2:c.A5G:p.Y2C,BLCAP:ENST00000397135.1:exon2:c.A5G:p.Y2C,BLCAP:ENST00000397137.1:exon2:c.A5G:p.Y2C,BLCAP:ENST00000414542.2:exon3:c.A5G:p.Y2C	0.392691	0.140859	-0.251832	4.27356e-237	Pig biased
chr17:40625112	ENSSSCG00000037248:ENSSSCG00000037248	-	chr20:36147581	BLCAP	-	0.00815986	0.00644468	-0.00171518	0.709286	Unbiased
chr17:40625114	ENSSSCG00000037248:ENSSSCG00000037248	-	chr20:36147583	BLCAP	-	0.0126059	0.00407056	-0.00853539	0.0394075	Unbiased
chr17:40625575	ENSSSCG00000037248:ENSSSCG00000037248	-	chr20:36148080	BLCAP	-	0.627615	0.479167	-0.148448	0.0746312	Unbiased
chr17:40625638	ENSSSCG00000037248:ENSSSCG00000037248	-	chr20:36148143	BLCAP	-	0.426396	0.310345	-0.116051	0.312686	Unbiased
chr17:44257109	ENSSSCG00000007360:CHD6	-	chr20:40239236	CHD6	-	0.0317797	0.5	0.46822	3.95719e-07	Human biased
chr17:44257181	ENSSSCG00000007360:CHD6	-	chr20:40239345	CHD6	-	0.643154	1	0.356846	0.0946864	Unbiased
chr17:48092321	ENSSSCG00000007435:ENSSSCG00000007435	-	chr20:44530673	PLTP	-	0.216867	0.166667	-0.0502008	1	Unbiased
chr17:48340028	ENSSSCG00000007439:CDH22,ENSSSCG00000007452:TP53RK	-	chr20:44802727	CDH22	-	0.419395	0.0659401	-0.353455	6.81451e-125	Pig biased
chr17:48340029	ENSSSCG00000007439:CDH22,ENSSSCG00000007452:TP53RK	-	chr20:44802728	CDH22	-	0.872197	0.261068	-0.61113	9.66513e-259	Pig biased
chr17:54558411	ENSSSCG00000034702:ENSSSCG00000034702	-	chr20:52104716	RP5-823G15.5	-	0.0714286	0.125	0.0535714	1	Unbiased
chr17:54558417	ENSSSCG00000034702:ENSSSCG00000034702	-	chr20:52104722	RP5-823G15.5	-	0	0.155556	0.155556	0.180872	Unbiased
chr17:54558438	ENSSSCG00000034702:ENSSSCG00000034702	-	chr20:52104743	RP5-823G15.5	-	0.0666667	0.235294	0.168627	0.26806	Unbiased
chr17:54558455	ENSSSCG00000034702:ENSSSCG00000034702	-	chr20:52104760	RP5-823G15.5	-	0	0.22807	0.22807	0.0568921	Unbiased
chr17:54558517	ENSSSCG00000034702:ENSSSCG00000034702	-	chr20:52104822	RP5-823G15.5	-	0.190476	0.6	0.409524	0.0168158	Unbiased
chr17:54558536	ENSSSCG00000034702:ENSSSCG00000034702	-	chr20:52104841	RP5-823G15.5	-	0.285714	0.4	0.114286	0.62785	Unbiased
chr17:54558613	ENSSSCG00000034702:ENSSSCG00000034702	-	chr20:52104918	RP5-823G15.5	-	0.24	0.365854	0.125854	0.196697	Unbiased
chr18:6145761	ENSSSCG00000021475:SLC4A2,ENSSSCG00000024184:FASTK	-	chr7:150777387	FASTK	-	0.0314861	0.148556	0.11707	1.46781e-20	Unbiased
chr18:19087165	ENSSSCG00000016566:NRF1	-	chr7:129297671	NRF1	-	0.0952381	0.285714	0.190476	0.252991	Unbiased
chr18:19121574	ENSSSCG00000016566:NRF1	-	chr7:129272287	NRF1	-	0.100865	0.333333	0.232469	1.23737e-05	Human biased
chr18:19121888	ENSSSCG00000016566:NRF1	-	chr7:129272054	NRF1	-	0.0176282	0.666667	0.649038	2.16983e-52	Human biased
chr18:55508486	ENSSSCG00000016773:ZNF282	-	chr7:148905351	ZNF282	-	0.076087	1	0.923913	0.000866958	Human biased
chr2:15113916	ENSSSCG00000013233:CELF1	-	chr11:47530390	CELF1	-	0.0397351	0.222222	0.182487	0.0661743	Unbiased
chr2:42362620	ENSSSCG00000039254:ENSSSCG00000039254,ENSSSCG00000040570:C11orf58	-	chr11:16762169	C11orf58	-	0.1	0.148148	0.0481481	1	Unbiased
chr2:48178056	ENSSSCG00000013403:GALNT18	-	chr11:11345754	GALNT18	-	0.0909091	0.217391	0.126482	0.251751	Unbiased
chr2:62302635	ENSSSCG00000022227:BRD4	-	chr19:15386620	BRD4	-	0.0352113	0.5	0.464789	0.00914046	Human biased
chr2:65772087	ENSSSCG00000013754:CACNA1A	-	chr19:13415258	CACNA1A	-	0.157303	0.4	0.242697	0.189136	Unbiased
chr2:65772113	ENSSSCG00000013754:CACNA1A	-	chr19:13415225	CACNA1A	-	0.208791	0.214286	0.00549451	1	Unbiased
chr2:66583116	-	-	chr19:12567087	CTD-3105H18.7	-	0.1	0.544643	0.444643	0.00797747	Human biased
chr2:88110656	-	-	chr5:78656693	JMY,HOMER1	-	0.100806	0.111111	0.0103047	1	Unbiased
chr2:88198568	ENSSSCG00000014113:HOMER1	-	chr5:78744709	HOMER1	-	0.549878	0.230769	-0.319109	0.0437396	Unbiased
chr2:92352900	ENSSSCG00000026780:EDIL3	-	chr5:83467716	EDIL3	-	0.183206	0.375	0.191794	0.185335	Unbiased
chr2:92352916	ENSSSCG00000026780:EDIL3	-	chr5:83467733	EDIL3	-	0.17284	0.333333	0.160494	0.209455	Unbiased
chr2:100350479	ENSSSCG00000036104:ENSSSCG00000036104	-	chr5:92810667	NR2F1-AS1	-	0.2	0.272727	0.0727273	0.685771	Unbiased
chr2:118036624	ENSSSCG00000014211:YTHDC2	-	chr5:112860210	YTHDC2	-	0.150748	0.266667	0.115919	0.265719	Unbiased
chr2:133721599	ENSSSCG00000014267:ENSSSCG00000014267	-	chr5:130772497	CTC-432M15.3,RAPGEF6	-	0.374065	0.705882	0.331818	0.00927893	Human biased
chr2:133722794	ENSSSCG00000014267:ENSSSCG00000014267	-	chr5:130773416	CTC-432M15.3,RAPGEF6	-	0.113208	0.666667	0.553459	5.64339e-05	Human biased
chr2:139428749	-	-	chr5:136740202	SPOCK1	-	0.034188	0.285714	0.251526	0.0369574	Unbiased
chr2:139496951	-	-	chr5:136811482	SPOCK1	-	0.0709677	0.0909091	0.0199413	0.666518	Unbiased
chr2:141789912	ENSSSCG00000021082:NRG2	-	chr5:139383534	NRG2	-	0.454545	0.5	0.0454545	1	Unbiased
chr2:143128189	ENSSSCG00000027371:PCDHGC4,ENSSSCG00000032137:PCDHGA9	-	chr5:140860206	PCDHGA1,PCDHGA10,PCDHGA11,PCDHGA12,PCDHGA2,PCDHGA3,PCDHGA4,PCDHGA5,PCDHGA6,PCDHGA7,PCDHGA8,PCDHGA9,PCDHGB1,PCDHGB2,PCDHGB3,PCDHGB4,PCDHGB6,PCDHGB7,PCDHGC3	-	0.037931	0.0833333	0.0454023	0.390939	Unbiased
chr2:150825983	ENSSSCG00000014437:PPARGC1B	-	chr5:149112500	PPARGC1B	-	0.4	0.352941	-0.0470588	0.78796	Unbiased
chr2:151280052	ENSSSCG00000014443:CAMK2A	-	chr5:149635062	CAMK2A	-	0.0609756	0.382353	0.321377	3.19623e-16	Human biased
chr3:14421666	ENSSSCG00000035984:ENSSSCG00000035984	-	chr7:69865750	AUTS2	-	0.261538	0.571429	0.30989	0.182771	Unbiased
chr3:35515598	-	-	chr16:7181302	RBFOX1	-	0.0720562	0.461538	0.389482	0.000225424	Human biased
chr3:35515603	-	-	chr16:7181297	RBFOX1	-	0.089701	0.25641	0.166709	0.00299209	Unbiased
chr3:35839076	-	-	chr16:6814863	RP11-420N3.2	-	0.0266393	0.25	0.223361	0.000345828	Human biased
chr3:38213202	ENSSSCG00000007950:ADCY9	-	chr16:4113505	ADCY9	-	0.0866667	0.4	0.313333	0.0683932	Unbiased
chr3:73325458	ENSSSCG00000008340:ANTXR1	-	chr2:69312966	ANTXR1	-	0.2	0.75	0.55	0.0949051	Unbiased
chr3:87350343	ENSSSCG00000008413:GPR75	-	chr2:54076334	MIR3682	-	0.0947989	0.20308	0.108281	1.03504e-21	Unbiased
chr3:92741776	ENSSSCG00000029485:FBXO11	-	chr2:48091017	FBXO11	-	0.111111	0.5	0.388889	0.214986	Unbiased
chr3:96161999	ENSSSCG00000008449:SLC3A1	-	chr2:44542583	SLC3A1	-	0.406061	0.166667	-0.239394	0.130528	Unbiased
chr3:103092104	ENSSSCG00000008496:EIF2AK2	-	chr2:37329350	EIF2AK2	-	0.475891	0.05	-0.425891	1.16483e-08	Pig biased
chr3:103093488	ENSSSCG00000008496:EIF2AK2	-	chr2:37328075	EIF2AK2	-	0.0963053	0.693579	0.597274	0	Human biased
chr3:103093534	ENSSSCG00000008496:EIF2AK2	-	chr2:37328029	EIF2AK2	-	0.0322881	0.0428571	0.010569	0.462379	Unbiased
chr3:103093549	ENSSSCG00000008496:EIF2AK2	-	chr2:37328014	EIF2AK2	-	0.0385349	0.0266667	-0.0118682	0.466102	Unbiased
chr3:103093559	ENSSSCG00000008496:EIF2AK2	-	chr2:37328000	EIF2AK2	-	0.0101044	0.0266393	0.0165349	0.0061803	Unbiased
chr3:103094017	ENSSSCG00000008496:EIF2AK2	-	chr2:37327650	EIF2AK2	-	0.0247994	0.0235849	-0.00121451	1	Unbiased
chr3:103094019	ENSSSCG00000008496:EIF2AK2	-	chr2:37327648	EIF2AK2	-	0.055429	0.0576037	0.00217468	0.849828	Unbiased
chr3:103094025	ENSSSCG00000008496:EIF2AK2	-	chr2:37327642	EIF2AK2	-	0.0191625	0.0252708	0.00610823	0.48463	Unbiased
chr3:103094026	ENSSSCG00000008496:EIF2AK2	-	chr2:37327641	EIF2AK2	-	0.0130814	0.0298507	0.0167694	0.236985	Unbiased
chr3:103094054	ENSSSCG00000008496:EIF2AK2	-	chr2:37327613	EIF2AK2	-	0.0688836	0.0375	-0.0313836	0.0826493	Unbiased
chr3:107303437	-	-	chr2:32539024	YIPF4	-	0.146209	0.2	0.0537906	0.519937	Unbiased
chr3:107303721	-	-	chr2:32538696	YIPF4	-	0.104167	0.285714	0.181548	0.0394287	Unbiased
chr3:112118691	ENSSSCG00000029185:MAPRE3	-	chr2:27208666	AC013472.3,AC013472.4	-	0.10989	0.428571	0.318681	0.0376579	Unbiased
chr3:125467491	ENSSSCG00000008629:ROCK2	-	chr2:11346196	ROCK2	-	0.0517647	0.428571	0.376807	0.0051579	Human biased
chr4:30987862	ENSSSCG00000006037:OXR1	-	chr8:107536152	RP11-649G15.2	-	0.029549	0.5	0.470451	0.00579493	Human biased
chr4:30987876	ENSSSCG00000006037:OXR1	-	chr8:107536144	RP11-649G15.2	-	0.0394161	0.5	0.460584	0.00974687	Human biased
chr4:35791315	-	-	chr8:102196350	ZNF706	-	0.2	0.270833	0.0708333	0.344227	Unbiased
chr4:35791442	-	-	chr8:102196207	ZNF706	-	0.328571	0.0652174	-0.263354	2.20409e-06	Pig biased
chr4:52318100	-	-	chr8:85346530	RALYL	-	0.0341772	0.3	0.265823	0.00478809	Human biased
chr4:98233961	ENSSSCG00000006643:ANXA9	-	chr1:150966013	ANXA9	-	0.027027	0.041958	0.014931	1	Unbiased
chr4:99438884	ENSSSCG00000006687:ITGA10	-	chr1:145542755	ITGA10	-	0.147887	0.128205	-0.0196822	0.593079	Unbiased
chr5:14850499	ENSSSCG00000000175:ADCY6	ENSSSCG00000000175:ENSSSCT00000000184:K77R	chr12:49176985	ADCY6	ADCY6:ENST00000307885.4:exon1:c.A233G:p.K78R,ADCY6:ENST00000357869.3:exon1:c.A233G:p.K78R,ADCY6:ENST00000550422.1:exon2:c.A233G:p.K78R	0.026936	0.0965517	0.0696157	0.00386098	Unbiased
chr5:14969754	ENSSSCG00000000180:FKBP11	-	chr12:49325703	AC073610.5,RP11-302B13.5	-	0.0218341	0.253219	0.231385	8.05494e-21	Human biased
chr5:18379985	ENSSSCG00000000259:CSAD	-	chr12:53552020	CSAD	-	0.0970874	0.2	0.102913	0.421849	Unbiased
chr5:22019073	ENSSSCG00000000406:PTGES3	-	chr12:57078805	PTGES3	-	0.0153846	0.571429	0.556044	0.000164099	Human biased
chr5:31098898	-	-	chr12:67139041	GRIP1,RP11-123O10.4	-	0.0909091	0.444444	0.353535	0.0280518	Unbiased
chr5:31104147	-	-	chr12:67143280	GRIP1,RP11-123O10.4	-	0.0774194	0.111111	0.0336918	0.524924	Unbiased
chr5:31104170	-	-	chr12:67143303	GRIP1,RP11-123O10.4	-	0.11811	0.454545	0.336435	0.0077981	Human biased
chr5:32920183	ENSSSCG00000032595:RAP1B	-	chr12:69016733	RAP1B	-	0.0361991	0.5	0.463801	0.00108469	Human biased
chr5:33537466	ENSSSCG00000038031:CPSF6	-	chr12:69648967	CPSF6	-	0.154404	0.529412	0.375008	0.000442791	Human biased
chr5:33540610	ENSSSCG00000038031:CPSF6	ENSSSCG00000038031:ENSSSCT00000039379:R202G;ENSSSCG00000038031:ENSSSCT00000041371:R150G;ENSSSCG00000038031:ENSSSCT00000053818:R202G;ENSSSCG00000038031:ENSSSCT00000055283:R202G;ENSSSCG00000038031:ENSSSCT00000064622:R202G	chr12:69651595	CPSF6	CPSF6:ENST00000266679.8:exon5:c.A604G:p.R202G,CPSF6:ENST00000435070.2:exon5:c.A604G:p.R202G	0.036383	0.0267559	-0.00962713	0.526261	Unbiased
chr5:70063974	-	-	chr22:18489516	XXbac-B476C20.13	-	0.1	0.285714	0.185714	0.536765	Unbiased
chr5:73486224	ENSSSCG00000031775:YAF2	-	chr12:42615257	YAF2	-	0.015625	0.2	0.184375	0.0798158	Unbiased
chr5:75939212	-	-	chr12:45403967	NELL2,DBX2	-	0.377907	1	0.622093	0.0570814	Unbiased
chr5:79562981	ENSSSCG00000027792:C12orf45	-	chr12:105398269	C12orf45,ALDH1L2	-	0.0161597	0.318182	0.302022	5.11205e-13	Human biased
chr5:84994264	ENSSSCG00000000882:ENSSSCG00000000882,ENSSSCG00000022083:ENSSSCG00000022083	-	chr12:99281530	ANKS1B	-	0.0467955	0.0833333	0.0365378	0.314602	Unbiased
chr6:28114581	ENSSSCG00000002776:ATP6V0D1	-	chr16:67497994	ATP6V0D1	-	0.597403	0.857143	0.25974	0.243471	Unbiased
chr6:44022256	ENSSSCG00000002872:KIAA0355	-	chr19:34834312	KIAA0355	-	0	0.25	0.25	0.0135677	Unbiased
chr6:45578632	ENSSSCG00000025355:ZNF146	-	chr19:36707279	ZNF146,ZNF565	-	0.121673	0.212121	0.0904482	0.169693	Unbiased
chr6:48621010	-	-	chr19:40825172	C19orf47	-	0.863636	0.380952	-0.482684	0.00155462	Pig biased
chr6:48648095	ENSSSCG00000025109:PLD3	-	chr19:40858671	PLD3	-	0.0290541	0.333333	0.304279	0.0124516	Unbiased
chr6:48648137	ENSSSCG00000025109:PLD3	-	chr19:40858705	PLD3	-	0.10262	0.258065	0.155444	0.0124785	Unbiased
chr6:48648172	ENSSSCG00000025109:PLD3	-	chr19:40858755	PLD3	-	0.0169252	0.166667	0.149741	0.0187653	Unbiased
chr6:53227807	ENSSSCG00000029567:SLC8A2	-	chr19:47965595	SLC8A2	-	0.0338164	0.642857	0.609041	6.695e-09	Human biased
chr6:57051465	ENSSSCG00000027741:ENSSSCG00000027741	-	chr19:21241089	ZNF430	-	0.363636	1	0.636364	0.0769231	Unbiased
chr6:62312475	ENSSSCG00000003987:ZSCAN4,ENSSSCG00000029696:ENSSSCG00000029696	-	chr19:58356527	ZNF587B	-	0.0847458	0.297297	0.212552	0.00218662	Human biased
chr6:62355530	ENSSSCG00000037467:ENSSSCG00000037467	-	chr19:58196667	ZNF551	ZNF551:ENST00000282296.5:exon2:c.A119G:p.Q40R,ZNF551:ENST00000356715.4:exon2:c.A71G:p.Q24R,ZNF551:ENST00000596085.1:exon2:c.A71G:p.Q24R	0.0253456	0.166667	0.141321	0.0122522	Unbiased
chr6:70126340	-	-	chr1:9832518	CLSTN1	-	0.145553	0.230769	0.0852167	0.420394	Unbiased
chr6:74153676	-	-	chr1:15165186	KAZN	-	0.123711	0.270833	0.147122	0.0357545	Unbiased
chr6:74153699	-	-	chr1:15165211	KAZN	-	0.387097	0.282051	-0.105045	0.390542	Unbiased
chr6:75062776	ENSSSCG00000034484:SPEN	-	chr1:16222784	SPEN	-	0.0451467	0.4	0.354853	0.0210669	Unbiased
chr6:79106337	ENSSSCG00000003512:EIF4G3	-	chr1:21219204	EIF4G3	EIF4G3:ENST00000537738.1:exon4:c.A463G:p.R155G	0.416829	0.153846	-0.262983	3.28526e-09	Pig biased
chr6:79106357	ENSSSCG00000003512:EIF4G3	-	chr1:21219224	EIF4G3	-	0.447489	0.333333	-0.114155	1	Unbiased
chr6:79106359	ENSSSCG00000003512:EIF4G3	-	chr1:21219226	EIF4G3	-	0.06313	0.333333	0.270203	0.178904	Unbiased
chr6:79363962	-	-	chr1:21484950	EIF4G3	-	0.0183767	0.15	0.131623	0.00814532	Unbiased
chr6:80423983	ENSSSCG00000026276:ZBTB40	-	chr1:22782378	ZBTB40	-	0.125	0.666667	0.541667	0.0970072	Unbiased
chr6:82167307	ENSSSCG00000003543:NIPAL3	-	chr1:24800808	NIPAL3,RCAN3	-	0.0914777	0.0212766	-0.0702011	0.002136	Unbiased
chr6:82167339	ENSSSCG00000003543:NIPAL3	-	chr1:24800839	NIPAL3,RCAN3	-	0.235747	0.117021	-0.118726	0.00712803	Unbiased
chr6:82167852	ENSSSCG00000003543:NIPAL3	-	chr1:24801424	NIPAL3,RCAN3	-	0.0624006	0.163934	0.101534	0.000118865	Unbiased
chr6:82167935	ENSSSCG00000003543:NIPAL3	-	chr1:24801493	NIPAL3,RCAN3	-	0.0106525	0.321429	0.310776	7.72846e-19	Human biased
chr6:83553567	ENSSSCG00000030660:PDIK1L	-	chr1:26451293	PDIK1L	-	0.020025	0.047619	0.027594	0.113682	Unbiased
chr6:87872925	ENSSSCG00000003596:SNRNP40	-	chr1:31762812	SNRNP40	-	0.208333	0.571429	0.363095	0.061297	Unbiased
chr6:88687853	ENSSSCG00000022014:DCDC2B	-	chr1:32676574	DCDC2B	-	0.136364	0.6	0.463636	0.00318067	Human biased
chr6:88785866	ENSSSCG00000003613:HDAC1	-	chr1:32799883	MARCKSL1	-	0.00266543	0.00167609	-0.000989336	0.250631	Unbiased
chr6:88785868	ENSSSCG00000003613:HDAC1	-	chr1:32799885	MARCKSL1	-	0.0019971	0.00205903	6.19212e-05	0.904109	Unbiased
chr6:88786031	ENSSSCG00000003613:HDAC1	-	chr1:32800048	MARCKSL1	-	0.00125606	0.00155703	0.000300964	0.568053	Unbiased
chr6:88786033	ENSSSCG00000003613:HDAC1	-	chr1:32800050	MARCKSL1	-	0.00195018	0.00134499	-0.000605195	0.460698	Unbiased
chr6:88786036	ENSSSCG00000003613:HDAC1	-	chr1:32800053	MARCKSL1	-	0.000757401	0.00134409	0.000586685	0.327134	Unbiased
chr6:91800433	ENSSSCG00000035914:PSMB2	-	chr1:36078778	PSMB2	-	1	0.833333	-0.166667	0.375	Unbiased
chr6:91981144	ENSSSCG00000003630:AGO3	-	chr1:36287882	AGO4	-	0.101124	0.125	0.0238764	0.673443	Unbiased
chr6:94793905	ENSSSCG00000003648:RRAGC	-	chr1:39316582	RRAGC	-	0.0431472	0.444444	0.401297	0.000585484	Human biased
chr6:94832391	ENSSSCG00000003651:RHBDL2	-	chr1:39361454	RP5-864K19.4	-	0.0152905	0.25	0.234709	0.0003504	Human biased
chr6:95048986	-	-	chr1:39644225	MACF1	-	0.166667	0.25	0.0833333	1	Unbiased
chr6:95939963	ENSSSCG00000003670:RLF	-	chr1:40670963	RLF	-	0.050308	1	0.949692	0.0026797	Human biased
chr6:103120024	ENSSSCG00000003690:DLGAP1	-	chr18:3613476	DLGAP1	-	0.20352	0.111111	-0.0924092	0.551782	Unbiased
chr6:103120043	ENSSSCG00000003690:DLGAP1	-	chr18:3613456	DLGAP1	-	0.150743	0.2	0.0492569	0.486045	Unbiased
chr6:108995339	ENSSSCG00000003711:CABYR	-	chr18:21739183	CABYR	-	0.0694444	0.632653	0.563209	5.46701e-19	Human biased
chr6:108995417	ENSSSCG00000003711:CABYR	-	chr18:21739263	CABYR	-	0.498925	0.872549	0.373624	4.11368e-13	Human biased
chr6:115966290	ENSSSCG00000003730:RNF138	-	chr18:29702531	RP11-53I6.4	-	0.0384615	1	0.961538	0.00177462	Human biased
chr6:115966385	ENSSSCG00000003730:RNF138	-	chr18:29702658	RP11-53I6.4	-	0.0607187	0.5	0.439281	0.0214518	Unbiased
chr6:118683298	ENSSSCG00000028047:DTNA	-	chr18:32405902	DTNA	-	0.0243056	0.9375	0.913194	2.83024e-19	Human biased
chr6:118683319	ENSSSCG00000028047:DTNA	-	chr18:32405923	DTNA	-	0.457666	0.363636	-0.0940295	0.760964	Unbiased
chr6:121087956	ENSSSCG00000003748:CELF4	-	chr18:34845917	CELF4	-	0.0246914	0.4	0.375309	1.58714e-06	Human biased
chr6:151205364	ENSSSCG00000023243:NFIA	-	chr1:61566339	NFIA	-	0.0734659	0.0487805	-0.0246854	0.763234	Unbiased
chr6:161525942	ENSSSCG00000003877:FAF1	-	chr1:50991577	FAF1	-	0.0546624	0.666667	0.612004	0.0100601	Unbiased
chr7:28915400	ENSSSCG00000001499:DST	-	chr6:56714128	RP11-472M19.2	-	0.214888	0.7	0.485112	6.85878e-06	Human biased
chr7:29996245	ENSSSCG00000001520:LEMD2	ENSSSCG00000001520:ENSSSCT00000001693:S242G;ENSSSCG00000001520:ENSSSCT00000050286:S242G;ENSSSCG00000001520:ENSSSCT00000065334:S242G	chr6:33756242	LEMD2	LEMD2:ENST00000293760.5:exon1:c.A652G:p.S218G	0.0255255	0.137931	0.112406	2.71246e-05	Unbiased
chr7:30267188	ENSSSCG00000001523:GRM4	ENSSSCG00000001523:ENSSSCT00000001696:Q124R	chr6:34100903	GRM4	GRM4:ENST00000374181.4:exon1:c.A371G:p.Q124R,GRM4:ENST00000538487.2:exon2:c.A371G:p.Q124R	0.0866261	0.141388	0.054762	0.00125216	Unbiased
chr7:37862310	ENSSSCG00000001646:BICRAL	-	chr6:42758123	GLTSCR1L	-	0.00975081	0.25	0.240249	0.000333813	Human biased
chr7:37884066	ENSSSCG00000001646:BICRAL	-	chr6:42775450	GLTSCR1L	-	0.4	0.333333	-0.0666667	1	Unbiased
chr7:39162176	ENSSSCG00000001697:TMEM63B	ENSSSCG00000001697:ENSSSCT00000001896:Q619R;ENSSSCG00000001697:ENSSSCT00000036360:Q522R;ENSSSCG00000001697:ENSSSCT00000038739:Q619R;ENSSSCG00000001697:ENSSSCT00000039005:Q606R	chr6:44120349	TMEM63B	TMEM63B:ENST00000259746.9:exon20:c.A1856G:p.Q619R,TMEM63B:ENST00000323267.6:exon20:c.A1856G:p.Q619R	0.271752	0.221845	-0.0499064	6.4999e-07	Unbiased
chr7:55810301	-	-	chr15:90789256	RP11-697E2.4	-	0.1	1	0.9	0.0454545	Unbiased
chr7:57043542	ENSSSCG00000001866:RCN2	-	chr15:77226585	RCN2	-	0.115809	0.5	0.384191	0.00149389	Human biased
chr7:57043573	ENSSSCG00000001866:RCN2	-	chr15:77226610	RCN2	-	0.605042	0.333333	-0.271709	0.565732	Unbiased
chr7:66646544	-	-	chr14:33566111	NPAS3	-	0.382218	0.459459	0.0772418	0.39396	Unbiased
chr7:67352753	ENSSSCG00000024517:AKAP6	-	chr14:32820540	AKAP6	-	0.0290237	0.666667	0.637643	0.00315351	Human biased
chr7:75765251	ENSSSCG00000002023:PABPN1,ENSSSCG00000028190:HOMEZ	-	chr14:23781563	BCL2L2-PABPN1	-	0.0291391	0.0932203	0.0640813	0.0024583	Unbiased
chr7:97362434	ENSSSCG00000002357:ALDH6A1	-	chr14:74526236	AC005484.5	-	0.0168662	0.0125571	-0.00430908	0.250637	Unbiased
chr7:101343409	-	-	chr14:78845183	RP11-332E19.2,AC007056.1	-	0.0246154	0.1875	0.162885	0.00798076	Unbiased
chr7:101343706	-	-	chr14:78845487	RP11-332E19.2,AC007056.1	-	0.0402194	0.0869565	0.0467371	0.251689	Unbiased
chr7:101345259	-	-	chr14:78847273	RP11-332E19.2,AC007056.1	-	0.11662	0.0769231	-0.039697	0.759762	Unbiased
chr7:101345260	-	-	chr14:78847274	RP11-332E19.2,AC007056.1	-	0.100798	0.037037	-0.0637606	0.510389	Unbiased
chr7:101346573	-	-	chr14:78848343	RP11-332E19.2,AC007056.1	-	0.00872093	0.0666667	0.0579457	0.140695	Unbiased
chr7:101346587	-	-	chr14:78848357	RP11-332E19.2,AC007056.1	-	0.0687023	0.142857	0.0741549	0.181636	Unbiased
chr7:101346588	-	-	chr14:78848358	RP11-332E19.2,AC007056.1	-	0.077187	0.193548	0.116361	0.0356161	Unbiased
chr7:101346593	-	-	chr14:78848363	RP11-332E19.2,AC007056.1	-	0.0452555	0.0666667	0.0214112	0.507948	Unbiased
chr7:101346628	-	-	chr14:78848400	RP11-332E19.2,AC007056.1	-	0.0782918	0.125	0.0467082	0.314881	Unbiased
chr7:101358627	-	-	chr14:78859631	RP11-332E19.2,AC007056.1	-	0.0514419	0.272727	0.221285	0.000844604	Human biased
chr7:101358676	-	-	chr14:78859679	RP11-332E19.2,AC007056.1	-	0.0169051	0.12	0.103095	0.0100433	Unbiased
chr7:102061580	-	-	chr14:79579429	NRXN3	-	0.0150925	0.23913	0.224038	4.12478e-10	Human biased
chr7:102161679	-	-	chr14:79685567	NRXN3	-	0.084048	0.75	0.665952	7.64237e-08	Human biased
chr7:112318167	ENSSSCG00000002436:TTC7B	-	chr14:91062177	TTC7B	-	0.880137	0.4	-0.480137	1.83038e-06	Pig biased
chr7:112407970	ENSSSCG00000002436:TTC7B	-	chr14:91158402	TTC7B	-	0.0761905	1	0.92381	0.0791139	Unbiased
chr7:112407972	ENSSSCG00000002436:TTC7B	-	chr14:91158404	TTC7B	-	0.0838926	0.0833333	-0.000559284	1	Unbiased
chr7:116479794	ENSSSCG00000002494:CLMN	-	chr14:95659656	CLMN	CLMN:ENST00000556441.1:exon3:c.A39G:p.K13K	0.392157	0.12963	-0.262527	0.000328891	Pig biased
chr7:121664538	-	-	chr14:101301087	RP11-123M6.2	-	0.079465	0.0133419	-0.0661231	1.50377e-37	Unbiased
chr7:121681246	-	-	chr14:101317570	RP11-123M6.2	-	0.481056	0.0859441	-0.395112	3.57685e-252	Pig biased
chr7:121684628	-	-	chr14:101320975	RP11-123M6.2	-	0.0441709	0.979274	0.935103	0	Human biased
chr8:1691779	ENSSSCG00000008692:ADD1	-	chr4:2903665	ADD1	-	0.122951	0.34375	0.220799	0.0020097	Human biased
chr8:11988716	ENSSSCG00000029227:LDB2	-	chr4:16848781	LDB2	-	0.186047	0.25	0.0639535	0.688945	Unbiased
chr8:38483430	ENSSSCG00000008826:FRYL	-	chr4:48570102	FRYL	-	0.181818	1	0.818182	0.0769231	Unbiased
chr8:40784496	-	-	chr4:54868234	FIP1L1	-	0.0210136	0.2	0.178986	0.106032	Unbiased
chr8:46206332	ENSSSCG00000024685:GRIA2	ENSSSCG00000024685:ENSSSCT00000022356:Q607R;ENSSSCG00000024685:ENSSSCT00000039120:Q607R;ENSSSCG00000024685:ENSSSCT00000066201:Q607R	chr4:158257875	GRIA2	GRIA2:ENST00000449365.1:exon10:c.A1679G:p.Q560R,GRIA2:ENST00000264426.9:exon11:c.A1820G:p.Q607R,GRIA2:ENST00000296526.7:exon11:c.A1820G:p.Q607R,GRIA2:ENST00000393815.2:exon11:c.A1679G:p.Q560R,GRIA2:ENST00000507898.1:exon11:c.A1679G:p.Q560R	0.996698	0.972867	-0.023831	6.21014e-40	Unbiased
chr8:46206336	ENSSSCG00000024685:GRIA2	ENSSSCG00000024685:ENSSSCT00000022356:Q608Q;ENSSSCG00000024685:ENSSSCT00000039120:Q608Q;ENSSSCG00000024685:ENSSSCT00000066201:Q608Q	chr4:158257879	GRIA2	GRIA2:ENST00000449365.1:exon10:c.A1683G:p.Q561Q,GRIA2:ENST00000264426.9:exon11:c.A1824G:p.Q608Q,GRIA2:ENST00000296526.7:exon11:c.A1824G:p.Q608Q,GRIA2:ENST00000393815.2:exon11:c.A1683G:p.Q561Q,GRIA2:ENST00000507898.1:exon11:c.A1683G:p.Q561Q	0.127994	0.152103	0.0241091	2.08151e-05	Unbiased
chr8:46206392	ENSSSCG00000024685:GRIA2	-	chr4:158257935	GRIA2	-	0.742145	0.489035	-0.25311	4.34958e-27	Pig biased
chr8:46206586	ENSSSCG00000024685:GRIA2	-	chr4:158258136	GRIA2	-	0.08159	0.794737	0.713147	1.96242e-258	Human biased
chr8:46206587	ENSSSCG00000024685:GRIA2	-	chr4:158258137	GRIA2	-	0.49339	0.708178	0.214788	7.00713e-20	Human biased
chr8:46206588	ENSSSCG00000024685:GRIA2	-	chr4:158258138	GRIA2	-	0.134231	0.291829	0.157597	3.59611e-16	Unbiased
chr8:46206693	ENSSSCG00000024685:GRIA2	-	chr4:158258243	GRIA2	-	0.129447	0.175	0.0455526	0.00845264	Unbiased
chr8:46235227	ENSSSCG00000024685:GRIA2	ENSSSCG00000024685:ENSSSCT00000022356:R764G;ENSSSCG00000024685:ENSSSCT00000039120:R764G;ENSSSCG00000024685:ENSSSCT00000066201:R764G	chr4:158281294	GRIA2	GRIA2:ENST00000449365.1:exon12:c.A2149G:p.R717G,GRIA2:ENST00000264426.9:exon13:c.A2290G:p.R764G,GRIA2:ENST00000296526.7:exon13:c.A2290G:p.R764G,GRIA2:ENST00000393815.2:exon13:c.A2149G:p.R717G,GRIA2:ENST00000507898.1:exon13:c.A2149G:p.R717G	0.577429	0.506002	-0.071427	1.79471e-24	Unbiased
chr8:46236088	ENSSSCG00000024685:GRIA2	-	chr4:158282160	GRIA2	-	0.00972801	0.0128205	0.0030925	0.537944	Unbiased
chr8:46236457	ENSSSCG00000024685:GRIA2	-	chr4:158282538	GRIA2	-	0.0164659	0.0598859	0.0434201	4.53675e-11	Unbiased
chr8:46236607	ENSSSCG00000024685:GRIA2	-	chr4:158282688	GRIA2	-	0.0326557	0.00657895	-0.0260768	0.0937271	Unbiased
chr8:56357499	ENSSSCG00000008913:IGFBP7	ENSSSCG00000008913:ENSSSCT00000009759:K95R;ENSSSCG00000008913:ENSSSCT00000040094:K95R;ENSSSCG00000008913:ENSSSCT00000047181:K73R	chr4:57976234	IGFBP7	IGFBP7:ENST00000295666.4:exon1:c.A284G:p.K95R,IGFBP7:ENST00000537922.1:exon1:c.A284G:p.K95R	0.896056	0.503054	-0.393001	8.56653e-290	Pig biased
chr8:56357551	ENSSSCG00000008913:IGFBP7	ENSSSCG00000008913:ENSSSCT00000009759:R78G;ENSSSCG00000008913:ENSSSCT00000040094:R78G	chr4:57976286	IGFBP7	IGFBP7:ENST00000295666.4:exon1:c.A232G:p.R78G,IGFBP7:ENST00000537922.1:exon1:c.A232G:p.R78G	0.615023	0.15376	-0.461264	2.0196e-91	Pig biased
chr8:109785102	-	-	chr4:113853309	ANK2	-	0.0765766	0.25	0.173423	0.024151	Unbiased
chr9:3243396	-	-	chr11:6513413	TIMM10B	-	0.0709677	0.0842105	0.0132428	0.806698	Unbiased
chr9:7241856	ENSSSCG00000014817:ARAP1	-	chr11:72400408	ARAP1-AS1	-	0.0461538	0.363636	0.317483	5.43006e-13	Human biased
chr9:13775663	-	-	chr11:79108776	TENM4	-	0.0864198	0.166667	0.0802469	0.327475	Unbiased
chr9:13775665	-	-	chr11:79108778	TENM4	-	0.162791	0.75	0.587209	0.0185626	Unbiased
chr9:17298135	ENSSSCG00000014901:PCF11	-	chr11:82868441	PCF11	-	0.248254	0.217494	-0.0307604	0.21321	Unbiased
chr9:19067219	-	-	chr11:84772024	DLG2	-	0.0290011	1	0.970999	0.0300429	Unbiased
chr9:24983734	-	-	chr11:92149060	FAT3	-	0.057377	1	0.942623	0.00027407	Human biased
chr9:26121068	ENSSSCG00000014946:CEP295	-	chr11:93415438	KIAA1731	-	0.0869565	0.666667	0.57971	0.0523077	Unbiased
chr9:32696253	ENSSSCG00000014979:CEP126	-	chr11:101852080	KIAA1377	-	0.0130648	1	0.986935	2.82184e-06	Human biased
chr9:35752568	ENSSSCG00000030565:GRIA4	ENSSSCG00000030565:ENSSSCT00000027751:R765G;ENSSSCG00000030565:ENSSSCT00000037154:R765G;ENSSSCG00000030565:ENSSSCT00000042517:R765G;ENSSSCG00000030565:ENSSSCT00000054101:R765G;ENSSSCG00000030565:ENSSSCT00000058908:R765G	chr11:105804694	GRIA4	GRIA4:ENST00000525187.1:exon13:c.A2293G:p.R765G,GRIA4:ENST00000530497.1:exon13:c.A2293G:p.R765G,GRIA4:ENST00000282499.5:exon14:c.A2293G:p.R765G,GRIA4:ENST00000393127.2:exon14:c.A2293G:p.R765G	0.769856	0.646999	-0.122857	1.83528e-11	Unbiased
chr9:35752581	ENSSSCG00000030565:GRIA4	-	chr11:105804707	AP000673.1	-	0.177616	0.333333	0.155718	0.0304631	Unbiased
chr9:35752607	ENSSSCG00000030565:GRIA4	-	chr11:105804733	AP000673.1	-	0.103333	0.30303	0.199697	0.00208769	Unbiased
chr9:35753179	ENSSSCG00000030565:GRIA4	-	chr11:105805312	GRIA4	-	0.589342	0.740964	0.151622	0.000117595	Unbiased
chr9:35763409	ENSSSCG00000030565:GRIA4	-	chr11:105815057	GRIA4	-	0.0448359	0.12	0.0751641	0.105331	Unbiased
chr9:35763410	ENSSSCG00000030565:GRIA4	-	chr11:105815058	GRIA4	-	0.205085	0.296296	0.0912116	0.122481	Unbiased
chr9:35763411	ENSSSCG00000030565:GRIA4	-	chr11:105815059	GRIA4	-	0.220901	0.209677	-0.0112232	1	Unbiased
chr9:35763415	ENSSSCG00000030565:GRIA4	-	chr11:105815063	GRIA4	-	0.174121	0.266667	0.0925453	0.113826	Unbiased
chr9:35763422	ENSSSCG00000030565:GRIA4	-	chr11:105815070	GRIA4	-	0.0296296	0.0740741	0.0444444	0.198751	Unbiased
chr9:35763425	ENSSSCG00000030565:GRIA4	-	chr11:105815073	GRIA4	-	0.0853242	0.1875	0.102176	0.0552335	Unbiased
chr9:35763433	ENSSSCG00000030565:GRIA4	-	chr11:105815081	GRIA4	-	0.0401826	0.142857	0.102674	0.0546663	Unbiased
chr9:35763448	ENSSSCG00000030565:GRIA4	-	chr11:105815096	GRIA4	-	0.0514523	0.117647	0.0661948	0.102361	Unbiased
chr9:35763484	ENSSSCG00000030565:GRIA4	-	chr11:105815132	GRIA4	-	0.0824468	0.461538	0.379092	6.10377e-22	Human biased
chr9:35763486	ENSSSCG00000030565:GRIA4	-	chr11:105815134	GRIA4	-	0.0796345	0.181818	0.102184	0.0501802	Unbiased
chr9:35764462	ENSSSCG00000030565:GRIA4	-	chr11:105816106	GRIA4	-	0.0834532	0.297872	0.214419	4.93797e-05	Human biased
chr9:35764466	ENSSSCG00000030565:GRIA4	-	chr11:105816110	GRIA4	-	0.0579345	0.179245	0.121311	5.94645e-05	Unbiased
chr9:35764485	ENSSSCG00000030565:GRIA4	-	chr11:105816129	GRIA4	-	0.680723	0.62931	-0.0514125	0.294688	Unbiased
chr9:35764501	ENSSSCG00000030565:GRIA4	-	chr11:105816145	GRIA4	-	0.554098	0.550459	-0.00363965	1	Unbiased
chr9:35764516	ENSSSCG00000030565:GRIA4	-	chr11:105816160	GRIA4	-	0.302682	0.578125	0.275443	2.04775e-09	Human biased
chr9:35770867	ENSSSCG00000030565:GRIA4	-	chr11:105822618	GRIA4	-	0.0733057	0.0465116	-0.026794	0.761482	Unbiased
chr9:35770872	ENSSSCG00000030565:GRIA4	-	chr11:105822623	GRIA4	-	0.148962	0.0652174	-0.0837448	0.13398	Unbiased
chr9:36686071	ENSSSCG00000025606:ATM	-	chr11:108167078	ATM	-	0.0319149	0.1	0.0680851	0.210637	Unbiased
chr9:39635300	ENSSSCG00000015027:ENSSSCG00000015027	-	chr11:111755153	C11orf1	-	0.3	0.333333	0.0333333	1	Unbiased
chr9:40760304	ENSSSCG00000015045:NCAM1	-	chr11:112954903	NCAM1	-	0.00574713	0.130435	0.124688	0.000614111	Unbiased
chr9:44432133	ENSSSCG00000015071:SIK3	-	chr11:116931791	SIK3	-	0.0429043	0.166667	0.123762	0.0986873	Unbiased
chr9:44432182	ENSSSCG00000015071:SIK3	-	chr11:116931841	SIK3	-	0.117878	0.2	0.0821218	0.469689	Unbiased
chr9:44467768	ENSSSCG00000015071:SIK3	-	chr11:116965116	SIK3	-	0.155668	0.142857	-0.0128112	1	Unbiased
chr9:45048643	-	-	chr11:117565045	DSCAML1	-	0.0571429	0.166667	0.109524	0.322051	Unbiased
chr9:46026507	ENSSSCG00000015097:DDX6	-	chr11:118619352	AP002954.4	-	0.0958333	0.0283487	-0.0674846	8.67731e-48	Unbiased
chr9:46051376	ENSSSCG00000015097:DDX6	-	chr11:118646648	DDX6	-	0.197183	0.4	0.202817	0.0955395	Unbiased
chr9:46824458	ENSSSCG00000015125:NECTIN1	-	chr11:119532688	PVRL1	-	0.0248092	0.159039	0.13423	9.04036e-86	Unbiased
chr9:47498601	ENSSSCG00000015129:ARHGEF12	-	chr11:120234303	ARHGEF12	-	0.0559006	0.6	0.544099	0.00211542	Human biased
chr9:60114368	-	-	chr11:133370904	OPCML	-	0.11157	0.888889	0.777319	3.35411e-07	Human biased
chr9:66293733	-	-	chr1:205576063	MFSD4,ELK4	-	0.487078	1	0.512922	0.238732	Unbiased
chr9:66431304	ENSSSCG00000022398:NUCKS1	-	chr1:205715280	NUCKS1	-	0.0137672	0.272727	0.25896	0.000626835	Human biased
chr9:66431324	ENSSSCG00000022398:NUCKS1	-	chr1:205715302	NUCKS1	-	0.03233	0.347826	0.315496	9.95468e-07	Human biased
chr9:67110260	ENSSSCG00000015645:ENSSSCG00000015645	-	chr1:206630935	SRGAP2	-	0.0290828	0.446809	0.417726	3.92007e-25	Human biased
chr9:72159635	ENSSSCG00000015313:KRIT1,ENSSSCG00000015314:ANKIB1	-	chr7:91850505	KRIT1	-	0.1125	0.666667	0.554167	0.044895	Unbiased
chr9:75474386	ENSSSCG00000015335:DYNC1I1	-	chr7:95442201	DYNC1I1	-	0.232558	0.526316	0.293758	0.0378208	Unbiased
chr9:87456259	ENSSSCG00000015368:HDAC9	-	chr7:18336225	HDAC9	-	0.0362976	0.333333	0.297036	0.109653	Unbiased
chr9:104904039	-	-	chr7:104643895	LINC01004	-	0.067696	0.230769	0.163073	0.056714	Unbiased
chr9:104904101	-	-	chr7:104643990	LINC01004	-	0.248521	0.444444	0.195924	0.011098	Unbiased
chr9:107936308	ENSSSCG00000015445:NRCAM	-	chr7:107794922	NRCAM	-	0.0759289	0.622642	0.546713	1.37775e-20	Human biased
chr9:113975530	ENSSSCG00000015480:PRRC2C	-	chr1:171456864	PRRC2C	-	0.261468	0.5	0.238532	0.216267	Unbiased
chr9:114528032	ENSSSCG00000018758:ENSSSCG00000018758,ENSSSCG00000038958:DNM3	-	chr1:172107978	MIR214	-	0.0451389	0.173913	0.128774	0.0284459	Unbiased
chr9:114528059	ENSSSCG00000018758:ENSSSCG00000018758,ENSSSCG00000038958:DNM3	-	chr1:172108005	MIR214	-	0.362745	0.4	0.0372549	0.689952	Unbiased
chr9:116215015	ENSSSCG00000015498:RC3H1	-	chr1:173913190	RC3H1	-	0.0440252	0.526316	0.482291	1.85199e-07	Human biased
chr9:117649106	-	-	chr1:175568033	TNR	-	0.375	0.9	0.525	0.00789766	Human biased
chrX:10430512	ENSSSCG00000012126:ENSSSCG00000012126	-	chrX:13790128	GPM6B	-	0.0289534	0.0314413	0.00248786	0.161013	Unbiased
chrX:10496458	ENSSSCG00000012126:ENSSSCG00000012126	-	chrX:13859324	GPM6B	-	0.363636	0.909091	0.545455	0.000776105	Human biased
chrX:17577016	ENSSSCG00000012164:CNKSR2	-	chrX:21405493	CNKSR2	-	0.0929368	0.3125	0.219563	0.0175379	Unbiased
chrX:24857475	-	-	chrX:29007288	IL1RAPL1	-	0.117391	0.222222	0.104831	0.109796	Unbiased
chrX:27172618	ENSSSCG00000028148:DMD	-	chrX:31274509	DMD	-	0.3	0.4	0.1	1	Unbiased
chrX:34537679	ENSSSCG00000012238:ENSSSCG00000012238	-	chrX:38435258	TM4SF2,TSPAN7	-	0.10473	0.235294	0.130564	0.108081	Unbiased
chrX:39228475	ENSSSCG00000029656:NDP	-	chrX:43825507	NDP-AS1	-	0.0392157	0.6	0.560784	0.00340488	Human biased
chrX:57465689	ENSSSCG00000027115:ENSSSCG00000027115	-	chrX:70684858	TAF1	-	0.0473815	0.333333	0.285952	6.19219e-13	Human biased
chrX:90336665	ENSSSCG00000037591:AMMECR1	-	chrX:109468722	AMMECR1	-	0	1	1	0.000564653	Human biased
chrX:91660650	ENSSSCG00000012586:ALG13,ENSSSCG00000034394:ENSSSCG00000034394	-	chrX:110947107	ALG13	-	0.361169	0.4	0.0388309	1	Unbiased
chrX:91660653	ENSSSCG00000012586:ALG13,ENSSSCG00000034394:ENSSSCG00000034394	-	chrX:110947110	ALG13	-	0.0599078	1	0.940092	0.000264522	Human biased
chrX:91660679	ENSSSCG00000012586:ALG13,ENSSSCG00000034394:ENSSSCG00000034394	-	chrX:110947134	ALG13	-	0.0586319	0.2	0.141368	0.271124	Unbiased
chrX:91660742	ENSSSCG00000012586:ALG13,ENSSSCG00000034394:ENSSSCG00000034394	-	chrX:110947194	ALG13	-	0.421818	0.533333	0.111515	0.430722	Unbiased
chrX:91660760	ENSSSCG00000012586:ALG13,ENSSSCG00000034394:ENSSSCG00000034394	-	chrX:110947209	ALG13	-	0.158333	0.142857	-0.0154762	1	Unbiased
chrX:91661100	ENSSSCG00000012586:ALG13,ENSSSCG00000034394:ENSSSCG00000034394	-	chrX:110947542	ALG13	-	0.142857	0.0909091	-0.0519481	1	Unbiased
chrX:91661106	ENSSSCG00000012586:ALG13,ENSSSCG00000034394:ENSSSCG00000034394	-	chrX:110947548	ALG13	-	0.118687	0.5	0.381313	0.0276742	Unbiased
chrX:91661133	ENSSSCG00000012586:ALG13,ENSSSCG00000034394:ENSSSCG00000034394	-	chrX:110947575	ALG13	-	0.0630081	0.555556	0.492547	0.000148748	Human biased
chrX:91661702	ENSSSCG00000012586:ALG13,ENSSSCG00000034394:ENSSSCG00000034394	-	chrX:110948162	ALG13	-	0.047619	0.4	0.352381	0.0212514	Unbiased
chrX:94053730	ENSSSCG00000012593:HTR2C	-	chrX:113818832	HTR2C	-	0.221494	0.666667	0.445173	9.30548e-10	Human biased
chrX:94259444	ENSSSCG00000012593:HTR2C	ENSSSCG00000012593:ENSSSCT00000035084:I156V	chrX:114082682	HTR2C	HTR2C:ENST00000276198.1:exon5:c.A466G:p.I156V,HTR2C:ENST00000371951.1:exon6:c.A466G:p.I156V	0.662461	0.866667	0.204206	0.0235425	Unbiased
chrX:94259446	ENSSSCG00000012593:HTR2C	ENSSSCG00000012593:ENSSSCT00000035084:I156M	chrX:114082684	HTR2C	HTR2C:ENST00000276198.1:exon5:c.A468G:p.I156M,HTR2C:ENST00000371951.1:exon6:c.A468G:p.I156M	0.294479	0.677419	0.382941	3.43663e-05	Human biased
chrX:94259451	ENSSSCG00000012593:HTR2C	ENSSSCG00000012593:ENSSSCT00000035084:N158S	chrX:114082689	HTR2C	HTR2C:ENST00000276198.1:exon5:c.A473G:p.N158S,HTR2C:ENST00000371951.1:exon6:c.A473G:p.N158S	0.588235	0.535714	-0.052521	0.69012	Unbiased
chrX:94259456	ENSSSCG00000012593:HTR2C	ENSSSCG00000012593:ENSSSCT00000035084:I160V	chrX:114082694	HTR2C	HTR2C:ENST00000276198.1:exon5:c.A478G:p.I160V,HTR2C:ENST00000371951.1:exon6:c.A478G:p.I160V	0.765957	0.75	-0.0159574	0.828777	Unbiased
chrX:94311786	ENSSSCG00000012593:HTR2C	-	chrX:114143037	HTR2C	-	0.0565749	0.142857	0.0862822	0.340585	Unbiased
chrX:101083849	ENSSSCG00000012638:GRIA3	ENSSSCG00000012638:ENSSSCT00000013819:R775G;ENSSSCG00000012638:ENSSSCT00000032933:R775G;ENSSSCG00000012638:ENSSSCT00000036560:R775G	chrX:122598962	GRIA3	GRIA3:ENST00000264357.5:exon13:c.A2323G:p.R775G,GRIA3:ENST00000371251.1:exon13:c.A2323G:p.R775G,GRIA3:ENST00000371256.5:exon13:c.A2323G:p.R775G,GRIA3:ENST00000542149.1:exon13:c.A2323G:p.R775G	0.939449	0.910137	-0.0293121	0.000104751	Unbiased
chrX:101083885	ENSSSCG00000012638:GRIA3	-	chrX:122598998	AL356213.1	-	0.458373	0.413793	-0.0445801	0.28578	Unbiased
chrX:101085093	ENSSSCG00000012638:GRIA3	-	chrX:122600204	GRIA3	-	0.0357562	0.333333	0.297577	0.000158923	Human biased
chrX:101085095	ENSSSCG00000012638:GRIA3	-	chrX:122600206	GRIA3	-	0.166148	0.75	0.583852	0.0163333	Unbiased
chrX:101099544	ENSSSCG00000012638:GRIA3	-	chrX:122614727	GRIA3	-	0.084507	0.181818	0.0973111	0.0119386	Unbiased
chrX:101905207	ENSSSCG00000012644:TENM1	-	chrX:123565581	TENM1	-	0.0909091	0.142857	0.0519481	1	Unbiased
chrX:108337634	ENSSSCG00000026301:RAP2C	-	chrX:131342200	RAP2C	-	0.212903	1	0.787097	1.49305e-06	Human biased
chrX:123475359	ENSSSCG00000025708:GABRA3	ENSSSCG00000025708:ENSSSCT00000024798:I342M;ENSSSCG00000025708:ENSSSCT00000040116:I342M;ENSSSCG00000025708:ENSSSCT00000055760:I291M	chrX:151358319	GABRA3	GABRA3:ENST00000370314.4:exon9:c.A1026G:p.I342M,GABRA3:ENST00000535043.1:exon9:c.A1026G:p.I342M	0.971687	0.872976	-0.0987106	2.72721e-31	Unbiased
chrX:124912200	ENSSSCG00000033299:ENSSSCG00000033299	-	chrX:153579736	FLNA	-	0.740741	0.0253521	-0.715389	9.41716e-35	Pig biased

## Sheet: Table S3b
Table S3b. List of conserved editing sites in Amygdala
Coordinate in Pig Genome	Pig Gene	Amino Acid Change in Pig	Coordinate in Human Genome	Human Gene	Amino Acid Change in Human	Editing level in Pig	Editing level in Human	Delta editing level	P value	Type
chr1:49419160	ENSSSCG00000004270:ADGRB3	-	chr6:69882978	BAI3	-	0.218182	0.238938	0.0207562	0.846994	Unbiased
chr1:50736742	ENSSSCG00000004276:SMAP1	-	chr6:71299053	C6orf57	-	0.333333	0.167939	-0.165394	0.0719072	Unbiased
chr1:50736743	ENSSSCG00000004276:SMAP1	-	chr6:71299054	C6orf57	-	0.428571	0.117291	-0.31128	0.000431872	Pig biased
chr1:66463993	ENSSSCG00000038757:ENSSSCG00000038757	-	chr6:99980058	TSTD3	-	0	0.111111	0.111111	0.473684	Unbiased
chr1:68530727	ENSSSCG00000004361:GRIK2	ENSSSCG00000004361:ENSSSCT00000004819:I518V;ENSSSCG00000004361:ENSSSCT00000032833:I518V	chr6:102337689	GRIK2	GRIK2:ENST00000318991.6:exon11:c.A1699G:p.I567V,GRIK2:ENST00000369134.4:exon11:c.A1552G:p.I518V,GRIK2:ENST00000369138.1:exon11:c.A1699G:p.I567V,GRIK2:ENST00000413795.1:exon11:c.A1699G:p.I567V,GRIK2:ENST00000421544.1:exon11:c.A1699G:p.I567V	0.395018	0.368421	-0.0265967	0.606422	Unbiased
chr1:68530740	ENSSSCG00000004361:GRIK2	ENSSSCG00000004361:ENSSSCT00000004819:Y522C;ENSSSCG00000004361:ENSSSCT00000032833:Y522C	chr6:102337702	GRIK2	GRIK2:ENST00000318991.6:exon11:c.A1712G:p.Y571C,GRIK2:ENST00000369134.4:exon11:c.A1565G:p.Y522C,GRIK2:ENST00000369138.1:exon11:c.A1712G:p.Y571C,GRIK2:ENST00000413795.1:exon11:c.A1712G:p.Y571C,GRIK2:ENST00000421544.1:exon11:c.A1712G:p.Y571C	0.691667	0.426471	-0.265196	7.17552e-07	Pig biased
chr1:68564368	ENSSSCG00000004361:GRIK2	ENSSSCG00000004361:ENSSSCT00000004819:G566G;ENSSSCG00000004361:ENSSSCT00000032833:G566G	chr6:102372572	GRIK2	GRIK2:ENST00000318991.6:exon12:c.A1845G:p.G615G,GRIK2:ENST00000369134.4:exon12:c.A1698G:p.G566G,GRIK2:ENST00000369138.1:exon12:c.A1845G:p.G615G,GRIK2:ENST00000413795.1:exon12:c.A1845G:p.G615G,GRIK2:ENST00000421544.1:exon12:c.A1845G:p.G615G	0.416459	0.134615	-0.281843	4.62967e-11	Pig biased
chr1:68564385	ENSSSCG00000004361:GRIK2	ENSSSCG00000004361:ENSSSCT00000004819:Q572R;ENSSSCG00000004361:ENSSSCT00000032833:Q572R	chr6:102372589	GRIK2	GRIK2:ENST00000318991.6:exon12:c.A1862G:p.Q621R,GRIK2:ENST00000369134.4:exon12:c.A1715G:p.Q572R,GRIK2:ENST00000369138.1:exon12:c.A1862G:p.Q621R,GRIK2:ENST00000413795.1:exon12:c.A1862G:p.Q621R,GRIK2:ENST00000421544.1:exon12:c.A1862G:p.Q621R	0.83463	0.571429	-0.263202	7.10091e-14	Pig biased
chr1:68564426	ENSSSCG00000004361:GRIK2	-	chr6:102372630	GRIK2	-	0.656347	1	0.343653	0.171295	Unbiased
chr1:68564478	ENSSSCG00000004361:GRIK2	-	chr6:102372682	GRIK2	-	0.0684211	0.2	0.131579	0.306169	Unbiased
chr1:68566288	ENSSSCG00000004361:GRIK2	-	chr6:102374553	GRIK2	-	0.265861	0.474576	0.208715	0.00187767	Human biased
chr1:68566294	ENSSSCG00000004361:GRIK2	-	chr6:102374559	GRIK2	-	0.141935	0.333333	0.191398	0.00420919	Unbiased
chr1:68566307	ENSSSCG00000004361:GRIK2	-	chr6:102374572	GRIK2	-	0.302703	0.865672	0.562969	4.88732e-16	Human biased
chr1:68566337	ENSSSCG00000004361:GRIK2	-	chr6:102374602	GRIK2	-	0.132231	0.25	0.117769	0.253064	Unbiased
chr1:68566351	ENSSSCG00000004361:GRIK2	-	chr6:102374616	GRIK2	-	0.715789	0.890909	0.17512	0.00733544	Unbiased
chr1:68566369	ENSSSCG00000004361:GRIK2	-	chr6:102374634	GRIK2	-	0.383495	0.508772	0.125277	0.0961709	Unbiased
chr1:68566378	ENSSSCG00000004361:GRIK2	-	chr6:102374643	GRIK2	-	0.922705	0.928571	0.00586611	1	Unbiased
chr1:98356728	ENSSSCG00000004506:CTIF	-	chr18:46286834	CTIF	-	0.1	0.193548	0.0935484	0.659905	Unbiased
chr1:122573868	ENSSSCG00000004652:COPS2	-	chr15:49418958	COPS2	-	0.0442478	0.0333333	-0.0109145	0.764732	Unbiased
chr1:163170088	ENSSSCG00000004926:PDCD7	ENSSSCG00000004926:ENSSSCT00000005436:Q43R	chr15:65425992	PDCD7	PDCD7:ENST00000204549.4:exon1:c.A128G:p.Q43R	0.0348837	0.166667	0.131783	0.240001	Unbiased
chr1:163170163	ENSSSCG00000004926:PDCD7	ENSSSCG00000004926:ENSSSCT00000005436:Q18R	chr15:65426067	PDCD7	PDCD7:ENST00000204549.4:exon1:c.A53G:p.Q18R	0.138686	0.178571	0.0398853	0.508944	Unbiased
chr1:268764115	ENSSSCG00000005646:COQ4	-	chr9:131092597	COQ4	-	0.137255	0.242424	0.105169	0.252481	Unbiased
chr12:24199880	ENSSSCG00000032782:PNPO	-	chr17:46025242	RP11-6N17.6,RP11-6N17.9	-	0.0295567	0.0170648	-0.0124918	0.369672	Unbiased
chr12:34246815	ENSSSCG00000017623:VEZF1	-	chr17:56049824	CUEDC1,VEZF1	-	0.606742	0.272	-0.334742	1.3263e-09	Pig biased
chr12:34246816	ENSSSCG00000017623:VEZF1	-	chr17:56049825	CUEDC1,VEZF1	-	0.186813	0.0915751	-0.0952381	0.00948245	Unbiased
chr12:34246820	ENSSSCG00000017623:VEZF1	-	chr17:56049829	CUEDC1,VEZF1	-	0.0505051	0.281925	0.23142	2.78179e-08	Human biased
chr12:44410166	ENSSSCG00000017756:NLK	-	chr17:26375487	NLK	-	0.0454545	0.125	0.0795455	0.183745	Unbiased
chr12:44855233	-	-	chr17:26936879	SPAG5-AS1	-	0.2	0.354839	0.154839	0.185471	Unbiased
chr12:44855248	-	-	chr17:26936898	SPAG5-AS1	-	0.473684	0.916667	0.442982	9.40803e-05	Human biased
chr12:53126165	ENSSSCG00000021363:CHD3	-	chr17:7772599	LSMD1	-	0.2	0.529412	0.329412	0.124129	Unbiased
chr13:2639980	ENSSSCG00000011190:METTL6	-	chr3:15454240	METTL6	-	0.0208333	0.447761	0.426928	5.19482e-12	Human biased
chr13:35884880	ENSSSCG00000011455:CACNA1D	ENSSSCG00000011455:ENSSSCT00000012536:I1660M	chr3:53820892	CACNA1D	CACNA1D:ENST00000540742.1:exon14:c.A1512G:p.I504M,CACNA1D:ENST00000422281.2:exon39:c.A4791G:p.I1597M,CACNA1D:ENST00000350061.5:exon40:c.A4836G:p.I1612M,CACNA1D:ENST00000288139.4:exon41:c.A4896G:p.I1632M	0.143791	0.2	0.0562092	0.3174	Unbiased
chr13:39922407	ENSSSCG00000011471:FLNB	ENSSSCG00000011471:ENSSSCT00000012553:Q2243R;ENSSSCG00000011471:ENSSSCT00000040435:Q2327R;ENSSSCG00000011471:ENSSSCT00000044709:Q2303R;ENSSSCG00000011471:ENSSSCT00000064169:Q2296R	chr3:58141801	FLNB	FLNB:ENST00000493452.1:exon39:c.A6308G:p.Q2103R,FLNB:ENST00000348383.5:exon40:c.A6764G:p.Q2255R,FLNB:ENST00000358537.3:exon40:c.A6815G:p.Q2272R,FLNB:ENST00000419752.2:exon40:c.A6347G:p.Q2116R,FLNB:ENST00000295956.4:exon41:c.A6887G:p.Q2296R,FLNB:ENST00000429972.2:exon41:c.A6854G:p.Q2285R,FLNB:ENST00000490882.1:exon42:c.A6980G:p.Q2327R	0.22449	0.0558376	-0.168652	1.22677e-11	Unbiased
chr13:40073139	ENSSSCG00000035452:HTD2	-	chr3:58304278	RPP14	-	0.00803213	0.171053	0.163021	1.8619e-07	Unbiased
chr13:40073242	ENSSSCG00000035452:HTD2	-	chr3:58304471	RPP14	-	0	0.0980392	0.0980392	0.0153057	Unbiased
chr13:44008194	ENSSSCG00000011489:CADPS	-	chr3:62413223	CADPS	-	0.204301	0.384615	0.180314	0.164418	Unbiased
chr13:44020000	ENSSSCG00000011489:CADPS	ENSSSCG00000011489:ENSSSCT00000012572:E1267G;ENSSSCG00000011489:ENSSSCT00000044538:E1242G;ENSSSCG00000011489:ENSSSCT00000066159:E1251G	chr3:62423807	CADPS	CADPS:ENST00000357948.3:exon25:c.A3512G:p.E1171G,CADPS:ENST00000283269.9:exon26:c.A3632G:p.E1211G,CADPS:ENST00000383710.4:exon28:c.A3749G:p.E1250G	0.475155	0.411514	-0.0636414	0.0391767	Unbiased
chr13:53081395	-	-	chr3:71729589	EIF4E3	-	0.284483	0.195652	-0.0888306	0.275689	Unbiased
chr13:69433108	ENSSSCG00000036643:ENSSSCG00000036643	-	chr3:15113852	ZFYVE20	-	0.0104384	0.0142857	0.0038473	0.560628	Unbiased
chr13:80226718	ENSSSCG00000011662:COPB2,ENSSSCG00000035771:MRPS22	-	chr3:139074203	MRPS22	-	0.230769	0.04	-0.190769	0.00348683	Unbiased
chr13:80226719	ENSSSCG00000011662:COPB2,ENSSSCG00000035771:MRPS22	-	chr3:139074204	MRPS22	-	0.0652174	0.02	-0.0452174	0.421415	Unbiased
chr13:80226720	ENSSSCG00000011662:COPB2,ENSSSCG00000035771:MRPS22	-	chr3:139074205	MRPS22	-	0.0212766	0.0521092	0.0308326	0.278601	Unbiased
chr13:82985229	ENSSSCG00000011677:GK5	-	chr3:141903621	GK5	-	0.1	0.125	0.025	1	Unbiased
chr13:117429056	ENSSSCG00000039285:MFN1	ENSSSCG00000039285:ENSSSCT00000039446:I328V	chr3:179093014	MFN1	MFN1:ENST00000263969.5:exon9:c.A982G:p.I328V,MFN1:ENST00000280653.7:exon10:c.A982G:p.I328V,MFN1:ENST00000471841.1:exon10:c.A982G:p.I328V	0.0760331	0.132653	0.05662	0.0752189	Unbiased
chr13:120993945	ENSSSCG00000025942:MCCC1	-	chr3:182744295	MCCC1	-	0.3	0.522388	0.222388	0.310027	Unbiased
chr13:192928420	ENSSSCG00000025119:GRIK1	-	chr21:30953679	GRIK1	-	0.1	0.285714	0.185714	0.536765	Unbiased
chr13:192928491	ENSSSCG00000025119:GRIK1	ENSSSCG00000025119:ENSSSCT00000028121:Q636R;ENSSSCG00000025119:ENSSSCT00000045911:Q621R;ENSSSCG00000025119:ENSSSCT00000055117:Q621R;ENSSSCG00000025119:ENSSSCT00000055366:Q621R	chr21:30953750	GRIK1	GRIK1:ENST00000389125.3:exon12:c.A1862G:p.Q621R,GRIK1:ENST00000399909.1:exon12:c.A1862G:p.Q621R,GRIK1:ENST00000399914.1:exon12:c.A1862G:p.Q621R,GRIK1:ENST00000327783.4:exon13:c.A1907G:p.Q636R,GRIK1:ENST00000389124.2:exon13:c.A1907G:p.Q636R,GRIK1:ENST00000399907.1:exon13:c.A1907G:p.Q636R,GRIK1:ENST00000399913.1:exon13:c.A1907G:p.Q636R,GRIK1:ENST00000309434.7:exon14:c.A1913G:p.Q638R,GRIK1:ENST00000…	0.239437	0.425178	0.185742	8.6954e-05	Unbiased
chr13:197168371	ENSSSCG00000023674:SON	ENSSSCG00000023674:ENSSSCT00000026483:T274A;ENSSSCG00000023674:ENSSSCT00000060699:T413A;ENSSSCG00000023674:ENSSSCT00000063351:T413A;ENSSSCG00000023674:ENSSSCT00000065483:T413A	chr21:34922801	SON	SON:ENST00000290239.6:exon3:c.A1264G:p.T422A,SON:ENST00000300278.4:exon3:c.A1264G:p.T422A,SON:ENST00000356577.4:exon3:c.A1264G:p.T422A,SON:ENST00000381679.4:exon3:c.A1264G:p.T422A	0.0308219	0.0769231	0.0461012	0.128127	Unbiased
chr13:197168826	ENSSSCG00000023674:SON	ENSSSCG00000023674:ENSSSCT00000026483:P425P;ENSSSCG00000023674:ENSSSCT00000060699:P564P;ENSSSCG00000023674:ENSSSCT00000063351:P564P;ENSSSCG00000023674:ENSSSCT00000065483:P564P	chr21:34923256	SON	SON:ENST00000290239.6:exon3:c.A1719G:p.P573P,SON:ENST00000300278.4:exon3:c.A1719G:p.P573P,SON:ENST00000356577.4:exon3:c.A1719G:p.P573P,SON:ENST00000381679.4:exon3:c.A1719G:p.P573P	0.116279	0.117647	0.00136799	1	Unbiased
chr13:197168845	ENSSSCG00000023674:SON	ENSSSCG00000023674:ENSSSCT00000026483:R432G;ENSSSCG00000023674:ENSSSCT00000060699:R571G;ENSSSCG00000023674:ENSSSCT00000063351:R571G;ENSSSCG00000023674:ENSSSCT00000065483:R571G	chr21:34923275	SON	SON:ENST00000290239.6:exon3:c.A1738G:p.R580G,SON:ENST00000300278.4:exon3:c.A1738G:p.R580G,SON:ENST00000356577.4:exon3:c.A1738G:p.R580G,SON:ENST00000381679.4:exon3:c.A1738G:p.R580G	0.313756	0.11215	-0.201606	8.24125e-06	Pig biased
chr13:207750361	ENSSSCG00000012089:ADARB1	-	chr21:46595621	ADARB1	-	0.625	0.166667	-0.458333	0.07121	Unbiased
chr14:51473632	ENSSSCG00000010135:DGCR8,ENSSSCG00000029742:ENSSSCG00000029742	-	chr22:20073330	MIR3618	-	0.25	0.21875	-0.03125	0.794962	Unbiased
chr14:80105988	ENSSSCG00000010325:KCNMA1	ENSSSCG00000010325:ENSSSCT00000056413:S11G	chr10:79397298	KCNMA1	KCNMA1:ENST00000286627.5:exon1:c.A103G:p.S35G,KCNMA1:ENST00000286628.8:exon1:c.A103G:p.S35G,KCNMA1:ENST00000354353.5:exon1:c.A103G:p.S35G,KCNMA1:ENST00000372440.1:exon1:c.A103G:p.S35G,KCNMA1:ENST00000372443.1:exon1:c.A103G:p.S35G,KCNMA1:ENST00000404771.3:exon1:c.A103G:p.S35G,KCNMA1:ENST00000404857.1:exon1:c.A103G:p.S35G,KCNMA1:ENST00000406533.3:exon1:c.A103G:p.S35G,KCNMA1:ENST00000480683.1:exon1:…	0.0197461	0.106007	0.0862609	4.96212e-11	Unbiased
chr14:111355216	ENSSSCG00000010550:CWF19L1	-	chr10:101992805	RP11-316M21.6	-	0.052	0.0931174	0.0411174	0.061099	Unbiased
chr14:111355330	ENSSSCG00000010550:CWF19L1	-	chr10:101992867	RP11-316M21.6	-	0.0144092	0.0487013	0.0342921	0.0122065	Unbiased
chr15:95565190	ENSSSCG00000016056:GLS	-	chr2:191799592	GLS	-	0.0211268	0.0902394	0.0691127	3.73786e-06	Unbiased
chr15:110909564	ENSSSCG00000024696:ENSSSCG00000024696	-	chr2:208619252	CCNYL1	-	0	0.0821918	0.0821918	0.000796406	Unbiased
chr15:110910482	ENSSSCG00000024696:ENSSSCG00000024696	-	chr2:208620129	CCNYL1	-	0.0939597	0.0747664	-0.0191934	0.656391	Unbiased
chr15:110910487	ENSSSCG00000024696:ENSSSCG00000024696	-	chr2:208620134	CCNYL1	-	0.0285714	0.125	0.0964286	0.0268942	Unbiased
chr15:112687180	ENSSSCG00000016153:UNC80	ENSSSCG00000016153:ENSSSCT00000017586:S2662G;ENSSSCG00000016153:ENSSSCT00000030483:S2730G	chr2:210835613	UNC80	UNC80:ENST00000539183.1:exon4:c.A328G:p.S110G,UNC80:ENST00000272845.6:exon53:c.A7975G:p.S2659G,UNC80:ENST00000439458.1:exon53:c.A7990G:p.S2664G	0.137066	0.08	-0.0570656	0.379547	Unbiased
chr15:118296733	ENSSSCG00000022758:PECR	-	chr2:216903561	PECR	-	0.215278	0.10596	-0.109318	0.0111622	Unbiased
chr17:26374997	ENSSSCG00000007088:ENSSSCG00000007088,ENSSSCG00000018309:ENSSSCG00000018309	-	chr20:17943427	SNORD17	-	0.0508096	0.2	0.14919	0.231426	Unbiased
chr17:31852360	ENSSSCG00000007143:MAVS	-	chr20:3851549	MAVS,RP11-119B16.2	-	0.1	0.030303	-0.069697	0.301173	Unbiased
chr17:40509602	ENSSSCG00000007334:SRC	-	chr20:36018604	SRC	-	0.272727	0.0588235	-0.213904	0.0465559	Unbiased
chr17:40625064	ENSSSCG00000037248:ENSSSCG00000037248	-	chr20:36147533	BLCAP	BLCAP:ENST00000373537.2:exon2:c.A44G:p.K15R,BLCAP:ENST00000397131.1:exon2:c.A44G:p.K15R,BLCAP:ENST00000397134.1:exon2:c.A44G:p.K15R,BLCAP:ENST00000397135.1:exon2:c.A44G:p.K15R,BLCAP:ENST00000397137.1:exon2:c.A44G:p.K15R,BLCAP:ENST00000414542.2:exon3:c.A44G:p.K15R	0.273381	0.0706376	-0.202744	2.97174e-80	Pig biased
chr17:40625094	ENSSSCG00000037248:ENSSSCG00000037248	-	chr20:36147563	BLCAP	BLCAP:ENST00000373537.2:exon2:c.A14G:p.Q5R,BLCAP:ENST00000397131.1:exon2:c.A14G:p.Q5R,BLCAP:ENST00000397134.1:exon2:c.A14G:p.Q5R,BLCAP:ENST00000397135.1:exon2:c.A14G:p.Q5R,BLCAP:ENST00000397137.1:exon2:c.A14G:p.Q5R,BLCAP:ENST00000414542.2:exon3:c.A14G:p.Q5R	0.284453	0.101349	-0.183104	2.28023e-72	Unbiased
chr17:40625103	ENSSSCG00000037248:ENSSSCG00000037248	-	chr20:36147572	BLCAP	BLCAP:ENST00000373537.2:exon2:c.A5G:p.Y2C,BLCAP:ENST00000397131.1:exon2:c.A5G:p.Y2C,BLCAP:ENST00000397134.1:exon2:c.A5G:p.Y2C,BLCAP:ENST00000397135.1:exon2:c.A5G:p.Y2C,BLCAP:ENST00000397137.1:exon2:c.A5G:p.Y2C,BLCAP:ENST00000414542.2:exon3:c.A5G:p.Y2C	0.393357	0.15923	-0.234127	7.24504e-81	Pig biased
chr17:40625112	ENSSSCG00000037248:ENSSSCG00000037248	-	chr20:36147581	BLCAP	-	0.0105622	0.00572738	-0.0048348	0.235135	Unbiased
chr17:40625114	ENSSSCG00000037248:ENSSSCG00000037248	-	chr20:36147583	BLCAP	-	0.00800256	0.00684932	-0.00115325	1	Unbiased
chr17:40625575	ENSSSCG00000037248:ENSSSCG00000037248	-	chr20:36148080	BLCAP	-	0.682927	0.272727	-0.4102	0.0189943	Unbiased
chr17:40625638	ENSSSCG00000037248:ENSSSCG00000037248	-	chr20:36148143	BLCAP	-	0.463415	0.2	-0.263415	0.369325	Unbiased
chr17:48340028	ENSSSCG00000007439:CDH22,ENSSSCG00000007452:TP53RK	-	chr20:44802727	CDH22	-	0.421053	0.0776699	-0.343383	5.65675e-15	Pig biased
chr17:48340029	ENSSSCG00000007439:CDH22,ENSSSCG00000007452:TP53RK	-	chr20:44802728	CDH22	-	0.797619	0.232545	-0.565074	3.21336e-26	Pig biased
chr17:54558455	ENSSSCG00000034702:ENSSSCG00000034702	-	chr20:52104760	RP5-823G15.5	-	0.3	0.125	-0.175	0.588235	Unbiased
chr17:54558517	ENSSSCG00000034702:ENSSSCG00000034702	-	chr20:52104822	RP5-823G15.5	-	0.3	0.857143	0.557143	0.0497738	Unbiased
chr17:54558613	ENSSSCG00000034702:ENSSSCG00000034702	-	chr20:52104918	RP5-823G15.5	-	0.305556	0.6	0.294444	0.316952	Unbiased
chr18:6145761	ENSSSCG00000021475:SLC4A2,ENSSSCG00000024184:FASTK	-	chr7:150777387	FASTK	-	0.0108696	0.107417	0.0965473	0.00171285	Unbiased
chr18:19121574	ENSSSCG00000016566:NRF1	-	chr7:129272287	NRF1	-	0.0895522	0.153846	0.0642939	0.298145	Unbiased
chr18:19121888	ENSSSCG00000016566:NRF1	-	chr7:129272054	NRF1	-	0.00497512	0.289474	0.284499	4.46557e-09	Human biased
chr2:66583116	-	-	chr19:12567087	CTD-3105H18.7	-	0.166667	0.5	0.333333	0.0455649	Unbiased
chr3:87350343	ENSSSCG00000008413:GPR75	-	chr2:54076334	MIR3682	-	0.128118	0.237885	0.109768	3.53001e-10	Unbiased
chr3:103092104	ENSSSCG00000008496:EIF2AK2	-	chr2:37329350	EIF2AK2	-	0.45283	0.0377358	-0.415094	7.79631e-10	Pig biased
chr3:103093488	ENSSSCG00000008496:EIF2AK2	-	chr2:37328075	EIF2AK2	-	0.1375	0.461995	0.324495	3.24769e-31	Human biased
chr3:103093534	ENSSSCG00000008496:EIF2AK2	-	chr2:37328029	EIF2AK2	-	0.0124378	0.0441176	0.0316798	0.0346181	Unbiased
chr3:103093549	ENSSSCG00000008496:EIF2AK2	-	chr2:37328014	EIF2AK2	-	0.0564263	0.0434783	-0.0129481	0.665831	Unbiased
chr3:103093559	ENSSSCG00000008496:EIF2AK2	-	chr2:37328000	EIF2AK2	-	0.00828729	0.0379747	0.0296874	0.0258628	Unbiased
chr3:103093996	ENSSSCG00000008496:EIF2AK2	-	chr2:37327675	EIF2AK2	-	0.174672	0.0222222	-0.15245	0.00548486	Unbiased
chr3:103094017	ENSSSCG00000008496:EIF2AK2	-	chr2:37327650	EIF2AK2	-	0.0305677	0.0333333	0.00276565	1	Unbiased
chr3:103094019	ENSSSCG00000008496:EIF2AK2	-	chr2:37327648	EIF2AK2	-	0.0833333	0.0533708	-0.0299625	0.164545	Unbiased
chr3:103094026	ENSSSCG00000008496:EIF2AK2	-	chr2:37327641	EIF2AK2	-	0.00913242	0.047619	0.0384866	0.12268	Unbiased
chr3:103094054	ENSSSCG00000008496:EIF2AK2	-	chr2:37327613	EIF2AK2	-	0.137363	0.0507937	-0.086569	0.00111867	Unbiased
chr3:107303437	-	-	chr2:32539024	YIPF4	-	0.205128	0.111111	-0.0940171	0.686642	Unbiased
chr4:99438884	ENSSSCG00000006687:ITGA10	-	chr1:145542755	ITGA10	-	0.0526316	0.428571	0.37594	0.0212448	Unbiased
chr5:14850499	ENSSSCG00000000175:ADCY6	ENSSSCG00000000175:ENSSSCT00000000184:K77R	chr12:49176985	ADCY6	ADCY6:ENST00000307885.4:exon1:c.A233G:p.K78R,ADCY6:ENST00000357869.3:exon1:c.A233G:p.K78R,ADCY6:ENST00000550422.1:exon2:c.A233G:p.K78R	0.047619	0.142857	0.0952381	0.3769	Unbiased
chr5:14969754	ENSSSCG00000000180:FKBP11	-	chr12:49325703	AC073610.5,RP11-302B13.5	-	0.0410959	0.384615	0.343519	5.68022e-05	Human biased
chr5:33540610	ENSSSCG00000038031:CPSF6	ENSSSCG00000038031:ENSSSCT00000039379:R202G;ENSSSCG00000038031:ENSSSCT00000041371:R150G;ENSSSCG00000038031:ENSSSCT00000053818:R202G;ENSSSCG00000038031:ENSSSCT00000055283:R202G;ENSSSCG00000038031:ENSSSCT00000064622:R202G	chr12:69651595	CPSF6	CPSF6:ENST00000266679.8:exon5:c.A604G:p.R202G,CPSF6:ENST00000435070.2:exon5:c.A604G:p.R202G	0.0247006	0.0252101	0.000509485	1	Unbiased
chr6:48621010	-	-	chr19:40825172	C19orf47	-	0.545455	0.694444	0.14899	0.22396	Unbiased
chr6:62312475	ENSSSCG00000003987:ZSCAN4,ENSSSCG00000029696:ENSSSCG00000029696	-	chr19:58356527	ZNF587B	-	0.047619	0.3	0.252381	0.043245	Unbiased
chr6:82167307	ENSSSCG00000003543:NIPAL3	-	chr1:24800808	NIPAL3,RCAN3	-	0.0454545	0.178571	0.133117	0.0221049	Unbiased
chr6:82167339	ENSSSCG00000003543:NIPAL3	-	chr1:24800839	NIPAL3,RCAN3	-	0.258278	0.0681818	-0.190096	0.0062208	Unbiased
chr6:82167852	ENSSSCG00000003543:NIPAL3	-	chr1:24801424	NIPAL3,RCAN3	-	0.0855019	0.157407	0.0719055	0.0626033	Unbiased
chr6:82167935	ENSSSCG00000003543:NIPAL3	-	chr1:24801493	NIPAL3,RCAN3	-	0.0209424	0.25974	0.238798	7.98022e-09	Human biased
chr6:83553567	ENSSSCG00000030660:PDIK1L	-	chr1:26451293	PDIK1L	-	0.0357143	0.0684932	0.0327789	0.473628	Unbiased
chr6:88785866	ENSSSCG00000003613:HDAC1	-	chr1:32799883	MARCKSL1	-	0.00325203	0.000990467	-0.00226157	0.0180569	Unbiased
chr6:88785868	ENSSSCG00000003613:HDAC1	-	chr1:32799885	MARCKSL1	-	0.00174642	0.00153383	-0.000212587	0.79698	Unbiased
chr6:88786031	ENSSSCG00000003613:HDAC1	-	chr1:32800048	MARCKSL1	-	0.00100503	0.0015497	0.000544676	0.557514	Unbiased
chr6:88786033	ENSSSCG00000003613:HDAC1	-	chr1:32800050	MARCKSL1	-	0.00174564	0.00127429	-0.000471345	0.764983	Unbiased
chr6:88786036	ENSSSCG00000003613:HDAC1	-	chr1:32800053	MARCKSL1	-	0.000959923	0.0010085	4.8577e-05	1	Unbiased
chr6:108995339	ENSSSCG00000003711:CABYR	-	chr18:21739183	CABYR	-	0.0909091	0.636364	0.545455	7.36115e-05	Human biased
chr6:108995417	ENSSSCG00000003711:CABYR	-	chr18:21739263	CABYR	-	0.509434	1	0.490566	0.00751107	Human biased
chr7:30267188	ENSSSCG00000001523:GRM4	ENSSSCG00000001523:ENSSSCT00000001696:Q124R	chr6:34100903	GRM4	GRM4:ENST00000374181.4:exon1:c.A371G:p.Q124R,GRM4:ENST00000538487.2:exon2:c.A371G:p.Q124R	0	0.2	0.2	0.263158	Unbiased
chr7:37862310	ENSSSCG00000001646:BICRAL	-	chr6:42758123	GLTSCR1L	-	0.0166667	0.16129	0.144624	0.00205123	Unbiased
chr7:39162176	ENSSSCG00000001697:TMEM63B	ENSSSCG00000001697:ENSSSCT00000001896:Q619R;ENSSSCG00000001697:ENSSSCT00000036360:Q522R;ENSSSCG00000001697:ENSSSCT00000038739:Q619R;ENSSSCG00000001697:ENSSSCT00000039005:Q606R	chr6:44120349	TMEM63B	TMEM63B:ENST00000259746.9:exon20:c.A1856G:p.Q619R,TMEM63B:ENST00000323267.6:exon20:c.A1856G:p.Q619R	0.124242	0.127524	0.00328149	0.923588	Unbiased
chr7:75765251	ENSSSCG00000002023:PABPN1,ENSSSCG00000028190:HOMEZ	-	chr14:23781563	BCL2L2-PABPN1	-	0.0222222	0.0869565	0.0647343	0.0538093	Unbiased
chr7:97362434	ENSSSCG00000002357:ALDH6A1	-	chr14:74526236	AC005484.5	-	0.0158228	0.00886263	-0.00696016	0.219564	Unbiased
chr7:116479794	ENSSSCG00000002494:CLMN	-	chr14:95659656	CLMN	CLMN:ENST00000556441.1:exon3:c.A39G:p.K13K	0.285714	0.207792	-0.0779221	0.499013	Unbiased
chr7:121664538	-	-	chr14:101301087	RP11-123M6.2	-	0.0635838	0.0181518	-0.045432	0.000661133	Unbiased
chr7:121681246	-	-	chr14:101317570	RP11-123M6.2	-	0.33913	0.0647285	-0.274402	7.17688e-29	Pig biased
chr7:121684628	-	-	chr14:101320975	RP11-123M6.2	-	0.0536232	0.984293	0.93067	0	Human biased
chr8:1691779	ENSSSCG00000008692:ADD1	-	chr4:2903665	ADD1	-	0.123077	0.352941	0.229864	0.0633205	Unbiased
chr8:46206332	ENSSSCG00000024685:GRIA2	ENSSSCG00000024685:ENSSSCT00000022356:Q607R;ENSSSCG00000024685:ENSSSCT00000039120:Q607R;ENSSSCG00000024685:ENSSSCT00000066201:Q607R	chr4:158257875	GRIA2	GRIA2:ENST00000449365.1:exon10:c.A1679G:p.Q560R,GRIA2:ENST00000264426.9:exon11:c.A1820G:p.Q607R,GRIA2:ENST00000296526.7:exon11:c.A1820G:p.Q607R,GRIA2:ENST00000393815.2:exon11:c.A1679G:p.Q560R,GRIA2:ENST00000507898.1:exon11:c.A1679G:p.Q560R	0.99619	0.944234	-0.0519561	6.82754e-14	Unbiased
chr8:46206336	ENSSSCG00000024685:GRIA2	ENSSSCG00000024685:ENSSSCT00000022356:Q608Q;ENSSSCG00000024685:ENSSSCT00000039120:Q608Q;ENSSSCG00000024685:ENSSSCT00000066201:Q608Q	chr4:158257879	GRIA2	GRIA2:ENST00000449365.1:exon10:c.A1683G:p.Q561Q,GRIA2:ENST00000264426.9:exon11:c.A1824G:p.Q608Q,GRIA2:ENST00000296526.7:exon11:c.A1824G:p.Q608Q,GRIA2:ENST00000393815.2:exon11:c.A1683G:p.Q561Q,GRIA2:ENST00000507898.1:exon11:c.A1683G:p.Q561Q	0.102041	0.13165	0.0296093	0.0411647	Unbiased
chr8:46206392	ENSSSCG00000024685:GRIA2	-	chr4:158257935	GRIA2	-	0.629717	0.173913	-0.455804	2.42679e-05	Pig biased
chr8:46206586	ENSSSCG00000024685:GRIA2	-	chr4:158258136	GRIA2	-	0.0631229	0.875	0.811877	9.81665e-14	Human biased
chr8:46206587	ENSSSCG00000024685:GRIA2	-	chr4:158258137	GRIA2	-	0.340426	0.428571	0.0881459	0.477425	Unbiased
chr8:46206588	ENSSSCG00000024685:GRIA2	-	chr4:158258138	GRIA2	-	0.127413	0.111111	-0.016302	1	Unbiased
chr8:46235227	ENSSSCG00000024685:GRIA2	ENSSSCG00000024685:ENSSSCT00000022356:R764G;ENSSSCG00000024685:ENSSSCT00000039120:R764G;ENSSSCG00000024685:ENSSSCT00000066201:R764G	chr4:158281294	GRIA2	GRIA2:ENST00000449365.1:exon12:c.A2149G:p.R717G,GRIA2:ENST00000264426.9:exon13:c.A2290G:p.R764G,GRIA2:ENST00000296526.7:exon13:c.A2290G:p.R764G,GRIA2:ENST00000393815.2:exon13:c.A2149G:p.R717G,GRIA2:ENST00000507898.1:exon13:c.A2149G:p.R717G	0.515315	0.361177	-0.154138	2.27327e-21	Unbiased
chr8:46236457	ENSSSCG00000024685:GRIA2	-	chr4:158282538	GRIA2	-	0.018315	0.0647482	0.0464332	0.0200697	Unbiased
chr8:46236607	ENSSSCG00000024685:GRIA2	-	chr4:158282688	GRIA2	-	0.0295983	0.0394737	0.00987538	0.717595	Unbiased
chr8:56357499	ENSSSCG00000008913:IGFBP7	ENSSSCG00000008913:ENSSSCT00000009759:K95R;ENSSSCG00000008913:ENSSSCT00000040094:K95R;ENSSSCG00000008913:ENSSSCT00000047181:K73R	chr4:57976234	IGFBP7	IGFBP7:ENST00000295666.4:exon1:c.A284G:p.K95R,IGFBP7:ENST00000537922.1:exon1:c.A284G:p.K95R	0.886364	0.444064	-0.442299	5.97981e-65	Pig biased
chr8:56357551	ENSSSCG00000008913:IGFBP7	ENSSSCG00000008913:ENSSSCT00000009759:R78G;ENSSSCG00000008913:ENSSSCT00000040094:R78G	chr4:57976286	IGFBP7	IGFBP7:ENST00000295666.4:exon1:c.A232G:p.R78G,IGFBP7:ENST00000537922.1:exon1:c.A232G:p.R78G	0.538462	0.0768278	-0.461634	2.08268e-22	Pig biased
chr9:3243396	-	-	chr11:6513413	TIMM10B	-	0.04	0.148936	0.108936	0.247587	Unbiased
chr9:3243397	-	-	chr11:6513412	TIMM10B	-	0.173913	0.0666667	-0.107246	0.197279	Unbiased
chr9:7241856	ENSSSCG00000014817:ARAP1	-	chr11:72400408	ARAP1-AS1	-	0.115385	0.304965	0.18958	0.00848054	Unbiased
chr9:17298135	ENSSSCG00000014901:PCF11	-	chr11:82868441	PCF11	-	0.179724	0.147783	-0.0319403	0.429756	Unbiased
chr9:35752568	ENSSSCG00000030565:GRIA4	ENSSSCG00000030565:ENSSSCT00000027751:R765G;ENSSSCG00000030565:ENSSSCT00000037154:R765G;ENSSSCG00000030565:ENSSSCT00000042517:R765G;ENSSSCG00000030565:ENSSSCT00000054101:R765G;ENSSSCG00000030565:ENSSSCT00000058908:R765G	chr11:105804694	GRIA4	GRIA4:ENST00000525187.1:exon13:c.A2293G:p.R765G,GRIA4:ENST00000530497.1:exon13:c.A2293G:p.R765G,GRIA4:ENST00000282499.5:exon14:c.A2293G:p.R765G,GRIA4:ENST00000393127.2:exon14:c.A2293G:p.R765G	0.770642	0.486207	-0.284435	2.59521e-07	Pig biased
chr9:46026507	ENSSSCG00000015097:DDX6	-	chr11:118619352	AP002954.4	-	0.139706	0.0446285	-0.0950774	1.39143e-15	Unbiased
chr9:46824458	ENSSSCG00000015125:NECTIN1	-	chr11:119532688	PVRL1	-	0.0613497	0.175118	0.113769	2.74772e-08	Unbiased
chr9:67110260	ENSSSCG00000015645:ENSSSCG00000015645	-	chr1:206630935	SRGAP2	-	0	0.55814	0.55814	2.53295e-09	Human biased
chr9:107936308	ENSSSCG00000015445:NRCAM	-	chr7:107794922	NRCAM	-	0.0833333	0.4	0.316667	0.0778991	Unbiased
chrX:10430512	ENSSSCG00000012126:ENSSSCG00000012126	-	chrX:13790128	GPM6B	-	0.0382521	0.0350357	-0.00321644	0.232516	Unbiased
chrX:57465689	ENSSSCG00000027115:ENSSSCG00000027115	-	chrX:70684858	TAF1	-	0.0806452	0.452991	0.372346	1.12551e-07	Human biased
chrX:94053730	ENSSSCG00000012593:HTR2C	-	chrX:113818832	HTR2C	-	0.332168	0.40625	0.0740822	0.433638	Unbiased
chrX:94259444	ENSSSCG00000012593:HTR2C	ENSSSCG00000012593:ENSSSCT00000035084:I156V	chrX:114082682	HTR2C	HTR2C:ENST00000276198.1:exon5:c.A466G:p.I156V,HTR2C:ENST00000371951.1:exon6:c.A466G:p.I156V	0.647436	0.888889	0.241453	0.275576	Unbiased
chrX:94259446	ENSSSCG00000012593:HTR2C	ENSSSCG00000012593:ENSSSCT00000035084:I156M	chrX:114082684	HTR2C	HTR2C:ENST00000276198.1:exon5:c.A468G:p.I156M,HTR2C:ENST00000371951.1:exon6:c.A468G:p.I156M	0.251462	0.5	0.248538	0.209493	Unbiased
chrX:94259450	ENSSSCG00000012593:HTR2C	ENSSSCG00000012593:ENSSSCT00000035084:N158D	chrX:114082688	HTR2C	HTR2C:ENST00000276198.1:exon5:c.A472G:p.N158D,HTR2C:ENST00000371951.1:exon6:c.A472G:p.N158D	0.175439	0.142857	-0.0325815	1	Unbiased
chrX:94259451	ENSSSCG00000012593:HTR2C	ENSSSCG00000012593:ENSSSCT00000035084:N158S	chrX:114082689	HTR2C	HTR2C:ENST00000276198.1:exon5:c.A473G:p.N158S,HTR2C:ENST00000371951.1:exon6:c.A473G:p.N158S	0.590643	0.5	-0.0906433	0.719369	Unbiased
chrX:94259456	ENSSSCG00000012593:HTR2C	ENSSSCG00000012593:ENSSSCT00000035084:I160V	chrX:114082694	HTR2C	HTR2C:ENST00000276198.1:exon5:c.A478G:p.I160V,HTR2C:ENST00000371951.1:exon6:c.A478G:p.I160V	0.729885	0.75	0.0201149	1	Unbiased
chrX:94311786	ENSSSCG00000012593:HTR2C	-	chrX:114143037	HTR2C	-	0.053719	0.0555556	0.00183655	1	Unbiased
chrX:98254413	-	-	chrX:119055933	RP3-327A19.5	-	0	0.133333	0.133333	0.0358852	Unbiased
chrX:101083849	ENSSSCG00000012638:GRIA3	ENSSSCG00000012638:ENSSSCT00000013819:R775G;ENSSSCG00000012638:ENSSSCT00000032933:R775G;ENSSSCG00000012638:ENSSSCT00000036560:R775G	chrX:122598962	GRIA3	GRIA3:ENST00000264357.5:exon13:c.A2323G:p.R775G,GRIA3:ENST00000371251.1:exon13:c.A2323G:p.R775G,GRIA3:ENST00000371256.5:exon13:c.A2323G:p.R775G,GRIA3:ENST00000542149.1:exon13:c.A2323G:p.R775G	0.943548	0.77621	-0.167339	1.22231e-14	Unbiased
chrX:101083885	ENSSSCG00000012638:GRIA3	-	chrX:122598998	AL356213.1	-	0.527273	0.384615	-0.142657	0.139572	Unbiased
chrX:123475359	ENSSSCG00000025708:GABRA3	ENSSSCG00000025708:ENSSSCT00000024798:I342M;ENSSSCG00000025708:ENSSSCT00000040116:I342M;ENSSSCG00000025708:ENSSSCT00000055760:I291M	chrX:151358319	GABRA3	GABRA3:ENST00000370314.4:exon9:c.A1026G:p.I342M,GABRA3:ENST00000535043.1:exon9:c.A1026G:p.I342M	0.949853	0.709877	-0.239976	4.62826e-18	Pig biased

## Sheet: Table S3c
Table S3c. List of conserved editing sites in Hippocampal formation
Coordinate in Pig Genome	Pig Gene	Amino Acid Change in Pig	Coordinate in Human Genome	Human Gene	Amino Acid Change in Human	Editing level in Pig	Editing level in Human	Delta editing level	P value	Type
chr1:49419160	ENSSSCG00000004270:ADGRB3	-	chr6:69882978	BAI3	-	0.147982	0.176056	0.0280743	0.557198	Unbiased
chr1:50736674	ENSSSCG00000004276:SMAP1	-	chr6:71298937	C6orf57	-	0.514286	0.0557143	-0.458571	1.14433e-12	Pig biased
chr1:50736742	ENSSSCG00000004276:SMAP1	-	chr6:71299053	C6orf57	-	0.266667	0.133519	-0.133148	0.0111209	Unbiased
chr1:50736743	ENSSSCG00000004276:SMAP1	-	chr6:71299054	C6orf57	-	0.358974	0.121748	-0.237226	0.000185352	Pig biased
chr1:50736757	ENSSSCG00000004276:SMAP1	-	chr6:71299066	C6orf57	-	0.166667	0.0693069	-0.0973597	0.0621108	Unbiased
chr1:68530727	ENSSSCG00000004361:GRIK2	ENSSSCG00000004361:ENSSSCT00000004819:I518V;ENSSSCG00000004361:ENSSSCT00000032833:I518V	chr6:102337689	GRIK2	GRIK2:ENST00000318991.6:exon11:c.A1699G:p.I567V,GRIK2:ENST00000369134.4:exon11:c.A1552G:p.I518V,GRIK2:ENST00000369138.1:exon11:c.A1699G:p.I567V,GRIK2:ENST00000413795.1:exon11:c.A1699G:p.I567V,GRIK2:ENST00000421544.1:exon11:c.A1699G:p.I567V	0.376155	0.439716	0.063561	0.167043	Unbiased
chr1:68530740	ENSSSCG00000004361:GRIK2	ENSSSCG00000004361:ENSSSCT00000004819:Y522C;ENSSSCG00000004361:ENSSSCT00000032833:Y522C	chr6:102337702	GRIK2	GRIK2:ENST00000318991.6:exon11:c.A1712G:p.Y571C,GRIK2:ENST00000369134.4:exon11:c.A1565G:p.Y522C,GRIK2:ENST00000369138.1:exon11:c.A1712G:p.Y571C,GRIK2:ENST00000413795.1:exon11:c.A1712G:p.Y571C,GRIK2:ENST00000421544.1:exon11:c.A1712G:p.Y571C	0.704082	0.672956	-0.0311257	0.455706	Unbiased
chr1:68564368	ENSSSCG00000004361:GRIK2	ENSSSCG00000004361:ENSSSCT00000004819:G566G;ENSSSCG00000004361:ENSSSCT00000032833:G566G	chr6:102372572	GRIK2	GRIK2:ENST00000318991.6:exon12:c.A1845G:p.G615G,GRIK2:ENST00000369134.4:exon12:c.A1698G:p.G566G,GRIK2:ENST00000369138.1:exon12:c.A1845G:p.G615G,GRIK2:ENST00000413795.1:exon12:c.A1845G:p.G615G,GRIK2:ENST00000421544.1:exon12:c.A1845G:p.G615G	0.357403	0.177778	-0.179626	6.22828e-07	Unbiased
chr1:68564385	ENSSSCG00000004361:GRIK2	ENSSSCG00000004361:ENSSSCT00000004819:Q572R;ENSSSCG00000004361:ENSSSCT00000032833:Q572R	chr6:102372589	GRIK2	GRIK2:ENST00000318991.6:exon12:c.A1862G:p.Q621R,GRIK2:ENST00000369134.4:exon12:c.A1715G:p.Q572R,GRIK2:ENST00000369138.1:exon12:c.A1862G:p.Q621R,GRIK2:ENST00000413795.1:exon12:c.A1862G:p.Q621R,GRIK2:ENST00000421544.1:exon12:c.A1862G:p.Q621R	0.84675	0.668942	-0.177808	9.38989e-12	Unbiased
chr1:68564478	ENSSSCG00000004361:GRIK2	-	chr6:102372682	GRIK2	-	0.0819672	0.142857	0.0608899	0.324541	Unbiased
chr1:68564727	ENSSSCG00000004361:GRIK2	-	chr6:102372931	GRIK2	-	0.680934	0.230769	-0.450165	0.00156143	Pig biased
chr1:68566288	ENSSSCG00000004361:GRIK2	-	chr6:102374553	GRIK2	-	0.203934	0.423913	0.219979	5.72161e-06	Human biased
chr1:68566294	ENSSSCG00000004361:GRIK2	-	chr6:102374559	GRIK2	-	0.0895349	0.310811	0.221276	4.07738e-07	Human biased
chr1:68566307	ENSSSCG00000004361:GRIK2	-	chr6:102374572	GRIK2	-	0.286467	0.939394	0.652926	1.08158e-36	Human biased
chr1:68566337	ENSSSCG00000004361:GRIK2	-	chr6:102374602	GRIK2	-	0.0614525	0.25641	0.194958	0.000352937	Unbiased
chr1:68566351	ENSSSCG00000004361:GRIK2	-	chr6:102374616	GRIK2	-	0.678917	0.944444	0.265528	2.76029e-11	Human biased
chr1:68566369	ENSSSCG00000004361:GRIK2	-	chr6:102374634	GRIK2	-	0.298587	0.418367	0.119781	0.024932	Unbiased
chr1:68566378	ENSSSCG00000004361:GRIK2	-	chr6:102374643	GRIK2	-	0.926523	0.99187	0.0653466	0.00314771	Unbiased
chr1:98356728	ENSSSCG00000004506:CTIF	-	chr18:46286834	CTIF	-	0.142857	0.205882	0.0630252	0.368275	Unbiased
chr1:107907143	-	-	chr15:64432909	SNX1	-	0	0.0384615	0.0384615	1	Unbiased
chr1:122573868	ENSSSCG00000004652:COPS2	-	chr15:49418958	COPS2	-	0.033871	0.0361446	0.00227361	0.757778	Unbiased
chr1:163170088	ENSSSCG00000004926:PDCD7	ENSSSCG00000004926:ENSSSCT00000005436:Q43R	chr15:65425992	PDCD7	PDCD7:ENST00000204549.4:exon1:c.A128G:p.Q43R	0.0342612	0.131148	0.0968863	0.00332336	Unbiased
chr1:163170163	ENSSSCG00000004926:PDCD7	ENSSSCG00000004926:ENSSSCT00000005436:Q18R	chr15:65426067	PDCD7	PDCD7:ENST00000204549.4:exon1:c.A53G:p.Q18R	0.135616	0.196262	0.0606452	0.104068	Unbiased
chr1:184407097	ENSSSCG00000005054:MAPK1IP1L	-	chr14:55525475	MAPK1IP1L	-	0.25	0.6	0.35	0.143766	Unbiased
chr1:250195288	ENSSSCG00000038824:FRRS1L	-	chr9:111900885	FRRS1L	-	0	0.05	0.05	1	Unbiased
chr1:268764115	ENSSSCG00000005646:COQ4	-	chr9:131092597	COQ4	-	0.0851064	0.316327	0.23122	1.07951e-05	Human biased
chr11:45247630	ENSSSCG00000024722:PIBF1	-	chr13:73506301	PIBF1	-	0.315789	0.166667	-0.149123	0.468213	Unbiased
chr12:24199758	ENSSSCG00000032782:PNPO	-	chr17:46025034	RP11-6N17.6,RP11-6N17.9	-	0.504933	0.0460526	-0.45888	6.71353e-32	Pig biased
chr12:24199880	ENSSSCG00000032782:PNPO	-	chr17:46025242	RP11-6N17.6,RP11-6N17.9	-	0.0305755	0.020202	-0.0103735	0.433	Unbiased
chr12:34246815	ENSSSCG00000017623:VEZF1	-	chr17:56049824	CUEDC1,VEZF1	-	0.591892	0.289916	-0.301976	7.52591e-24	Pig biased
chr12:34246816	ENSSSCG00000017623:VEZF1	-	chr17:56049825	CUEDC1,VEZF1	-	0.152113	0.126136	-0.0259763	0.230377	Unbiased
chr12:34246820	ENSSSCG00000017623:VEZF1	-	chr17:56049829	CUEDC1,VEZF1	-	0.0631068	0.321839	0.258732	4.32799e-30	Human biased
chr12:44410166	ENSSSCG00000017756:NLK	-	chr17:26375487	NLK	-	0.0318725	0.166667	0.134794	0.194292	Unbiased
chr12:44855233	-	-	chr17:26936879	SPAG5-AS1	-	0.142857	0.523077	0.38022	5.03182e-08	Human biased
chr12:44855248	-	-	chr17:26936898	SPAG5-AS1	-	0.42437	0.886364	0.461994	5.69149e-09	Human biased
chr13:2639980	ENSSSCG00000011190:METTL6	-	chr3:15454240	METTL6	-	0.0135747	0.425926	0.412351	1.52762e-19	Human biased
chr13:35884880	ENSSSCG00000011455:CACNA1D	ENSSSCG00000011455:ENSSSCT00000012536:I1660M	chr3:53820892	CACNA1D	CACNA1D:ENST00000540742.1:exon14:c.A1512G:p.I504M,CACNA1D:ENST00000422281.2:exon39:c.A4791G:p.I1597M,CACNA1D:ENST00000350061.5:exon40:c.A4836G:p.I1612M,CACNA1D:ENST00000288139.4:exon41:c.A4896G:p.I1632M	0.192475	0.203125	0.0106503	0.868592	Unbiased
chr13:39922407	ENSSSCG00000011471:FLNB	ENSSSCG00000011471:ENSSSCT00000012553:Q2243R;ENSSSCG00000011471:ENSSSCT00000040435:Q2327R;ENSSSCG00000011471:ENSSSCT00000044709:Q2303R;ENSSSCG00000011471:ENSSSCT00000064169:Q2296R	chr3:58141801	FLNB	FLNB:ENST00000493452.1:exon39:c.A6308G:p.Q2103R,FLNB:ENST00000348383.5:exon40:c.A6764G:p.Q2255R,FLNB:ENST00000358537.3:exon40:c.A6815G:p.Q2272R,FLNB:ENST00000419752.2:exon40:c.A6347G:p.Q2116R,FLNB:ENST00000295956.4:exon41:c.A6887G:p.Q2296R,FLNB:ENST00000429972.2:exon41:c.A6854G:p.Q2285R,FLNB:ENST00000490882.1:exon42:c.A6980G:p.Q2327R	0.197802	0.0771775	-0.120625	1.72755e-16	Unbiased
chr13:40073139	ENSSSCG00000035452:HTD2	-	chr3:58304278	RPP14	-	0.0265076	0.0921053	0.0655976	0.00020393	Unbiased
chr13:40073242	ENSSSCG00000035452:HTD2	-	chr3:58304471	RPP14	-	0.0174564	0.0655738	0.0481174	0.0444259	Unbiased
chr13:44020000	ENSSSCG00000011489:CADPS	ENSSSCG00000011489:ENSSSCT00000012572:E1267G;ENSSSCG00000011489:ENSSSCT00000044538:E1242G;ENSSSCG00000011489:ENSSSCT00000066159:E1251G	chr3:62423807	CADPS	CADPS:ENST00000357948.3:exon25:c.A3512G:p.E1171G,CADPS:ENST00000283269.9:exon26:c.A3632G:p.E1211G,CADPS:ENST00000383710.4:exon28:c.A3749G:p.E1250G	0.394914	0.321834	-0.0730803	9.01116e-07	Unbiased
chr13:53081395	-	-	chr3:71729589	EIF4E3	-	0.233121	0.178082	-0.0550388	0.311451	Unbiased
chr13:69433108	ENSSSCG00000036643:ENSSSCG00000036643	-	chr3:15113852	ZFYVE20	-	0.0051458	0.0232558	0.01811	0.211902	Unbiased
chr13:80224944	ENSSSCG00000011662:COPB2,ENSSSCG00000035771:MRPS22	-	chr3:139072545	MRPS22	-	0.0447761	0.105263	0.060487	0.304527	Unbiased
chr13:80226718	ENSSSCG00000011662:COPB2,ENSSSCG00000035771:MRPS22	-	chr3:139074203	MRPS22	-	0.254011	0.0789474	-0.175063	0.0153003	Unbiased
chr13:80226719	ENSSSCG00000011662:COPB2,ENSSSCG00000035771:MRPS22	-	chr3:139074204	MRPS22	-	0.0381679	0.0285714	-0.00959651	1	Unbiased
chr13:80226720	ENSSSCG00000011662:COPB2,ENSSSCG00000035771:MRPS22	-	chr3:139074205	MRPS22	-	0.0179487	0.0782828	0.0603341	8.11846e-05	Unbiased
chr13:82951918	ENSSSCG00000011677:GK5	-	chr3:141882641	GK5	-	0.6	0.414634	-0.185366	0.315997	Unbiased
chr13:82951964	ENSSSCG00000011677:GK5	-	chr3:141882672	GK5	-	0.2	1	0.8	5.97976e-08	Human biased
chr13:82985229	ENSSSCG00000011677:GK5	-	chr3:141903621	GK5	-	0.181818	0.0740741	-0.107744	0.564113	Unbiased
chr13:117429056	ENSSSCG00000039285:MFN1	ENSSSCG00000039285:ENSSSCT00000039446:I328V	chr3:179093014	MFN1	MFN1:ENST00000263969.5:exon9:c.A982G:p.I328V,MFN1:ENST00000280653.7:exon10:c.A982G:p.I328V,MFN1:ENST00000471841.1:exon10:c.A982G:p.I328V	0.0492986	0.0892019	0.0399033	0.0231392	Unbiased
chr13:120993945	ENSSSCG00000025942:MCCC1	-	chr3:182744295	MCCC1	-	0.5	0.549296	0.0492958	1	Unbiased
chr13:181318508	-	-	chr21:17929249	LINC00478	-	0	1	1	5.8358e-13	Human biased
chr13:192928491	ENSSSCG00000025119:GRIK1	ENSSSCG00000025119:ENSSSCT00000028121:Q636R;ENSSSCG00000025119:ENSSSCT00000045911:Q621R;ENSSSCG00000025119:ENSSSCT00000055117:Q621R;ENSSSCG00000025119:ENSSSCT00000055366:Q621R	chr21:30953750	GRIK1	GRIK1:ENST00000389125.3:exon12:c.A1862G:p.Q621R,GRIK1:ENST00000399909.1:exon12:c.A1862G:p.Q621R,GRIK1:ENST00000399914.1:exon12:c.A1862G:p.Q621R,GRIK1:ENST00000327783.4:exon13:c.A1907G:p.Q636R,GRIK1:ENST00000389124.2:exon13:c.A1907G:p.Q636R,GRIK1:ENST00000399907.1:exon13:c.A1907G:p.Q636R,GRIK1:ENST00000399913.1:exon13:c.A1907G:p.Q636R,GRIK1:ENST00000309434.7:exon14:c.A1913G:p.Q638R,GRIK1:ENST00000…	0.258645	0.633083	0.374438	1.02805e-45	Human biased
chr13:197168371	ENSSSCG00000023674:SON	ENSSSCG00000023674:ENSSSCT00000026483:T274A;ENSSSCG00000023674:ENSSSCT00000060699:T413A;ENSSSCG00000023674:ENSSSCT00000063351:T413A;ENSSSCG00000023674:ENSSSCT00000065483:T413A	chr21:34922801	SON	SON:ENST00000290239.6:exon3:c.A1264G:p.T422A,SON:ENST00000300278.4:exon3:c.A1264G:p.T422A,SON:ENST00000356577.4:exon3:c.A1264G:p.T422A,SON:ENST00000381679.4:exon3:c.A1264G:p.T422A	0.0349598	0.12069	0.0857298	7.76687e-05	Unbiased
chr13:197168826	ENSSSCG00000023674:SON	ENSSSCG00000023674:ENSSSCT00000026483:P425P;ENSSSCG00000023674:ENSSSCT00000060699:P564P;ENSSSCG00000023674:ENSSSCT00000063351:P564P;ENSSSCG00000023674:ENSSSCT00000065483:P564P	chr21:34923256	SON	SON:ENST00000290239.6:exon3:c.A1719G:p.P573P,SON:ENST00000300278.4:exon3:c.A1719G:p.P573P,SON:ENST00000356577.4:exon3:c.A1719G:p.P573P,SON:ENST00000381679.4:exon3:c.A1719G:p.P573P	0.0861656	0.0916667	0.00550104	0.866828	Unbiased
chr13:197168845	ENSSSCG00000023674:SON	ENSSSCG00000023674:ENSSSCT00000026483:R432G;ENSSSCG00000023674:ENSSSCT00000060699:R571G;ENSSSCG00000023674:ENSSSCT00000063351:R571G;ENSSSCG00000023674:ENSSSCT00000065483:R571G	chr21:34923275	SON	SON:ENST00000290239.6:exon3:c.A1738G:p.R580G,SON:ENST00000300278.4:exon3:c.A1738G:p.R580G,SON:ENST00000356577.4:exon3:c.A1738G:p.R580G,SON:ENST00000381679.4:exon3:c.A1738G:p.R580G	0.323243	0.0972973	-0.225946	3.15827e-12	Pig biased
chr13:207750347	ENSSSCG00000012089:ADARB1	-	chr21:46595607	ADARB1	-	0.538462	0.6	0.0615385	1	Unbiased
chr13:207750361	ENSSSCG00000012089:ADARB1	-	chr21:46595621	ADARB1	-	0.421053	0.2	-0.221053	0.643571	Unbiased
chr14:51473632	ENSSSCG00000010135:DGCR8,ENSSSCG00000029742:ENSSSCG00000029742	-	chr22:20073330	MIR3618	-	0.122807	0.230769	0.107962	0.130228	Unbiased
chr14:76260957	ENSSSCG00000010301:PPP3CB	-	chr10:75207299	PPP3CB	-	0.0817121	0.4	0.318288	0.0627215	Unbiased
chr14:80105988	ENSSSCG00000010325:KCNMA1	ENSSSCG00000010325:ENSSSCT00000056413:S11G	chr10:79397298	KCNMA1	KCNMA1:ENST00000286627.5:exon1:c.A103G:p.S35G,KCNMA1:ENST00000286628.8:exon1:c.A103G:p.S35G,KCNMA1:ENST00000354353.5:exon1:c.A103G:p.S35G,KCNMA1:ENST00000372440.1:exon1:c.A103G:p.S35G,KCNMA1:ENST00000372443.1:exon1:c.A103G:p.S35G,KCNMA1:ENST00000404771.3:exon1:c.A103G:p.S35G,KCNMA1:ENST00000404857.1:exon1:c.A103G:p.S35G,KCNMA1:ENST00000406533.3:exon1:c.A103G:p.S35G,KCNMA1:ENST00000480683.1:exon1:…	0.0145147	0.0935441	0.0790295	7.37135e-24	Unbiased
chr14:110540447	ENSSSCG00000010536:CNNM1	ENSSSCG00000010536:ENSSSCT00000011526:S237G;ENSSSCG00000010536:ENSSSCT00000050252:S237G;ENSSSCG00000010536:ENSSSCT00000055954:S237G	chr10:101089862	CNNM1	CNNM1:ENST00000356713.4:exon1:c.A718G:p.S240G,CNNM1:ENST00000370528.3:exon3:c.A505G:p.S169G,CNNM1:ENST00000446890.1:exon3:c.A505G:p.S169G	0.245238	0.285714	0.0404762	0.682643	Unbiased
chr14:111355216	ENSSSCG00000010550:CWF19L1	-	chr10:101992805	RP11-316M21.6	-	0.0428016	0.113924	0.0711225	8.52415e-08	Unbiased
chr14:111355286	ENSSSCG00000010550:CWF19L1	-	chr10:101992843	RP11-316M21.6	-	0.0109428	0.0413223	0.0303796	0.0199123	Unbiased
chr14:111355330	ENSSSCG00000010550:CWF19L1	-	chr10:101992867	RP11-316M21.6	-	0.0112434	0.0625	0.0512566	2.26711e-07	Unbiased
chr14:114080348	ENSSSCG00000010594:NT5C2	-	chr10:104865311	NT5C2	-	0.152174	1	0.847826	0.00018043	Human biased
chr15:95565190	ENSSSCG00000016056:GLS	-	chr2:191799592	GLS	-	0.0124509	0.0969793	0.0845285	8.63323e-19	Unbiased
chr15:110909564	ENSSSCG00000024696:ENSSSCG00000024696	-	chr2:208619252	CCNYL1	-	0.0126404	0.117647	0.105007	0.00192754	Unbiased
chr15:110910214	ENSSSCG00000024696:ENSSSCG00000024696	-	chr19:28476943	LLNLF-65H9.1,CTD-2043I16.1	-	0.384615	0.833333	0.448718	0.140867	Unbiased
chr15:110910482	ENSSSCG00000024696:ENSSSCG00000024696	-	chr2:208620129	CCNYL1	-	0.107955	0.115152	0.00719697	0.776664	Unbiased
chr15:110910487	ENSSSCG00000024696:ENSSSCG00000024696	-	chr2:208620134	CCNYL1	-	0.0728745	0.0588235	-0.014051	1	Unbiased
chr15:112687180	ENSSSCG00000016153:UNC80	ENSSSCG00000016153:ENSSSCT00000017586:S2662G;ENSSSCG00000016153:ENSSSCT00000030483:S2730G	chr2:210835613	UNC80	UNC80:ENST00000539183.1:exon4:c.A328G:p.S110G,UNC80:ENST00000272845.6:exon53:c.A7975G:p.S2659G,UNC80:ENST00000439458.1:exon53:c.A7990G:p.S2664G	0.156151	0.0914286	-0.0647221	0.0209837	Unbiased
chr15:118296733	ENSSSCG00000022758:PECR	-	chr2:216903561	PECR	-	0.188552	0.177665	-0.0108872	0.832631	Unbiased
chr15:118296837	ENSSSCG00000022758:PECR	-	chr2:216903629	PECR	-	0.0413223	0.0882353	0.046913	0.192732	Unbiased
chr17:11555419	ENSSSCG00000031857:SMIM19	-	chr8:42400730	SMIM19	-	0.35	0.111111	-0.238889	0.261439	Unbiased
chr17:31852360	ENSSSCG00000007143:MAVS	-	chr20:3851549	MAVS,RP11-119B16.2	-	0.184211	0.0267857	-0.157425	0.00273534	Unbiased
chr17:35263308	ENSSSCG00000007228:HM13	-	chr20:30126775	HM13	-	0.570093	0.458333	-0.11176	0.368164	Unbiased
chr17:35263355	ENSSSCG00000007228:HM13	-	chr20:30126822	HM13	-	0.244898	0.333333	0.0884354	0.638266	Unbiased
chr17:40509602	ENSSSCG00000007334:SRC	-	chr20:36018604	SRC	-	0.0697674	0.132075	0.062308	0.503939	Unbiased
chr17:40625064	ENSSSCG00000037248:ENSSSCG00000037248	-	chr20:36147533	BLCAP	BLCAP:ENST00000373537.2:exon2:c.A44G:p.K15R,BLCAP:ENST00000397131.1:exon2:c.A44G:p.K15R,BLCAP:ENST00000397134.1:exon2:c.A44G:p.K15R,BLCAP:ENST00000397135.1:exon2:c.A44G:p.K15R,BLCAP:ENST00000397137.1:exon2:c.A44G:p.K15R,BLCAP:ENST00000414542.2:exon3:c.A44G:p.K15R	0.264992	0.0625923	-0.2024	1.15058e-158	Pig biased
chr17:40625094	ENSSSCG00000037248:ENSSSCG00000037248	-	chr20:36147563	BLCAP	BLCAP:ENST00000373537.2:exon2:c.A14G:p.Q5R,BLCAP:ENST00000397131.1:exon2:c.A14G:p.Q5R,BLCAP:ENST00000397134.1:exon2:c.A14G:p.Q5R,BLCAP:ENST00000397135.1:exon2:c.A14G:p.Q5R,BLCAP:ENST00000397137.1:exon2:c.A14G:p.Q5R,BLCAP:ENST00000414542.2:exon3:c.A14G:p.Q5R	0.288091	0.0976245	-0.190466	2.8692e-124	Unbiased
chr17:40625103	ENSSSCG00000037248:ENSSSCG00000037248	-	chr20:36147572	BLCAP	BLCAP:ENST00000373537.2:exon2:c.A5G:p.Y2C,BLCAP:ENST00000397131.1:exon2:c.A5G:p.Y2C,BLCAP:ENST00000397134.1:exon2:c.A5G:p.Y2C,BLCAP:ENST00000397135.1:exon2:c.A5G:p.Y2C,BLCAP:ENST00000397137.1:exon2:c.A5G:p.Y2C,BLCAP:ENST00000414542.2:exon3:c.A5G:p.Y2C	0.405821	0.149781	-0.25604	2.57967e-159	Pig biased
chr17:40625112	ENSSSCG00000037248:ENSSSCG00000037248	-	chr20:36147581	BLCAP	-	0.00785159	0.00529101	-0.00256058	1	Unbiased
chr17:40625114	ENSSSCG00000037248:ENSSSCG00000037248	-	chr20:36147583	BLCAP	-	0.0116212	0.0135593	0.00193809	0.779545	Unbiased
chr17:40625575	ENSSSCG00000037248:ENSSSCG00000037248	-	chr20:36148080	BLCAP	-	0.706422	0.25	-0.456422	0.00278442	Pig biased
chr17:40625638	ENSSSCG00000037248:ENSSSCG00000037248	-	chr20:36148143	BLCAP	-	0.425532	0.47619	0.0506586	0.813914	Unbiased
chr17:48340028	ENSSSCG00000007439:CDH22,ENSSSCG00000007452:TP53RK	-	chr20:44802727	CDH22	-	0.340426	0.0784314	-0.261994	6.31615e-30	Pig biased
chr17:48340029	ENSSSCG00000007439:CDH22,ENSSSCG00000007452:TP53RK	-	chr20:44802728	CDH22	-	0.801843	0.24498	-0.556863	1.97548e-88	Pig biased
chr17:54558411	ENSSSCG00000034702:ENSSSCG00000034702	-	chr20:52104716	RP5-823G15.5	-	0.0909091	0.291667	0.200758	0.011185	Unbiased
chr17:54558412	ENSSSCG00000034702:ENSSSCG00000034702	-	chr20:52104717	RP5-823G15.5	-	0.107692	0.075	-0.0326923	0.738332	Unbiased
chr17:54558417	ENSSSCG00000034702:ENSSSCG00000034702	-	chr20:52104722	RP5-823G15.5	-	0.0821918	0.28	0.197808	0.00545939	Unbiased
chr17:54558438	ENSSSCG00000034702:ENSSSCG00000034702	-	chr20:52104743	RP5-823G15.5	-	0.032967	0.243902	0.210935	0.000465235	Human biased
chr17:54558455	ENSSSCG00000034702:ENSSSCG00000034702	-	chr20:52104760	RP5-823G15.5	-	0.0989011	0.16	0.0610989	0.473334	Unbiased
chr17:54558517	ENSSSCG00000034702:ENSSSCG00000034702	-	chr20:52104822	RP5-823G15.5	-	0.136986	0.478261	0.341275	0.001263	Human biased
chr17:54558536	ENSSSCG00000034702:ENSSSCG00000034702	-	chr20:52104841	RP5-823G15.5	-	0.298969	0.638889	0.33992	0.000579408	Human biased
chr17:54558613	ENSSSCG00000034702:ENSSSCG00000034702	-	chr20:52104918	RP5-823G15.5	-	0.131737	0.361111	0.229375	0.00254337	Human biased
chr18:6145761	ENSSSCG00000021475:SLC4A2,ENSSSCG00000024184:FASTK	-	chr7:150777387	FASTK	-	0.0175439	0.1	0.0824561	6.16082e-08	Unbiased
chr18:19121574	ENSSSCG00000016566:NRF1	-	chr7:129272287	NRF1	-	0.074856	0.227273	0.152417	0.0257751	Unbiased
chr18:19121888	ENSSSCG00000016566:NRF1	-	chr7:129272054	NRF1	-	0.00967742	0.566667	0.556989	7.15103e-21	Human biased
chr2:66583116	-	-	chr19:12567087	CTD-3105H18.7	-	0.05	0.583333	0.533333	3.1278e-05	Human biased
chr2:122812166	-	-	chr5:118175068	DTWD2	-	0.204918	0.0454545	-0.159463	0.127275	Unbiased
chr2:150825983	ENSSSCG00000014437:PPARGC1B	-	chr5:149112500	PPARGC1B	-	0.3	0.428571	0.128571	0.643665	Unbiased
chr3:87350343	ENSSSCG00000008413:GPR75	-	chr2:54076334	MIR3682	-	0.122967	0.216172	0.0932044	2.33531e-14	Unbiased
chr3:103092081	ENSSSCG00000008496:EIF2AK2	-	chr2:37329381	EIF2AK2	-	0.0849673	0.0769231	-0.00804424	1	Unbiased
chr3:103092104	ENSSSCG00000008496:EIF2AK2	-	chr2:37329350	EIF2AK2	-	0.443701	0.115385	-0.328317	0.000901769	Pig biased
chr3:103093488	ENSSSCG00000008496:EIF2AK2	-	chr2:37328075	EIF2AK2	-	0.109221	0.54491	0.43569	3.5976e-123	Human biased
chr3:103093534	ENSSSCG00000008496:EIF2AK2	-	chr2:37328029	EIF2AK2	-	0.0207135	0.0217391	0.00102567	0.6234	Unbiased
chr3:103093549	ENSSSCG00000008496:EIF2AK2	-	chr2:37328014	EIF2AK2	-	0.0551237	0.0378788	-0.0172449	0.293549	Unbiased
chr3:103093559	ENSSSCG00000008496:EIF2AK2	-	chr2:37328000	EIF2AK2	-	0.00630915	0.0271084	0.0207993	0.00229218	Unbiased
chr3:103094017	ENSSSCG00000008496:EIF2AK2	-	chr2:37327650	EIF2AK2	-	0.0239295	0.0466667	0.0227372	0.166437	Unbiased
chr3:103094019	ENSSSCG00000008496:EIF2AK2	-	chr2:37327648	EIF2AK2	-	0.0685484	0.0745342	0.00598577	0.698044	Unbiased
chr3:103094025	ENSSSCG00000008496:EIF2AK2	-	chr2:37327642	EIF2AK2	-	0.0300481	0.03	-4.80769e-05	1	Unbiased
chr3:103094026	ENSSSCG00000008496:EIF2AK2	-	chr2:37327641	EIF2AK2	-	0.00917431	0.0192308	0.0100565	0.411276	Unbiased
chr3:103094054	ENSSSCG00000008496:EIF2AK2	-	chr2:37327613	EIF2AK2	-	0.0887097	0.105263	0.0165535	0.683239	Unbiased
chr3:107303437	-	-	chr2:32539024	YIPF4	-	0.162461	0.217391	0.0549307	0.563665	Unbiased
chr3:107303721	-	-	chr2:32538696	YIPF4	-	0.0632911	0.25	0.186709	0.123371	Unbiased
chr4:35791315	-	-	chr8:102196350	ZNF706	-	0.1	0.166667	0.0666667	1	Unbiased
chr4:35791442	-	-	chr8:102196207	ZNF706	-	0.205882	0.333333	0.127451	0.601603	Unbiased
chr4:98233961	ENSSSCG00000006643:ANXA9	-	chr1:150966013	ANXA9	-	0.0294118	0.0473888	0.017977	1	Unbiased
chr4:99438884	ENSSSCG00000006687:ITGA10	-	chr1:145542755	ITGA10	-	0.122137	0.108108	-0.0140293	1	Unbiased
chr5:14850499	ENSSSCG00000000175:ADCY6	ENSSSCG00000000175:ENSSSCT00000000184:K77R	chr12:49176985	ADCY6	ADCY6:ENST00000307885.4:exon1:c.A233G:p.K78R,ADCY6:ENST00000357869.3:exon1:c.A233G:p.K78R,ADCY6:ENST00000550422.1:exon2:c.A233G:p.K78R	0.00636943	0.075	0.0686306	0.026988	Unbiased
chr5:14969754	ENSSSCG00000000180:FKBP11	-	chr12:49325703	AC073610.5,RP11-302B13.5	-	0.0112782	0.24359	0.232312	7.54183e-11	Human biased
chr5:18379985	ENSSSCG00000000259:CSAD	-	chr12:53552020	CSAD	-	0.111111	0.00943396	-0.101677	4.68835e-05	Unbiased
chr5:22019073	ENSSSCG00000000406:PTGES3	-	chr12:57078805	PTGES3	-	0	0.333333	0.333333	2.43544e-05	Human biased
chr5:33540610	ENSSSCG00000038031:CPSF6	ENSSSCG00000038031:ENSSSCT00000039379:R202G;ENSSSCG00000038031:ENSSSCT00000041371:R150G;ENSSSCG00000038031:ENSSSCT00000053818:R202G;ENSSSCG00000038031:ENSSSCT00000055283:R202G;ENSSSCG00000038031:ENSSSCT00000064622:R202G	chr12:69651595	CPSF6	CPSF6:ENST00000266679.8:exon5:c.A604G:p.R202G,CPSF6:ENST00000435070.2:exon5:c.A604G:p.R202G	0.025059	0.0483871	0.0233281	0.136	Unbiased
chr6:48621010	-	-	chr19:40825172	C19orf47	-	0.75	0.468085	-0.281915	0.0418662	Unbiased
chr6:48648137	ENSSSCG00000025109:PLD3	-	chr19:40858705	PLD3	-	0.10101	0.6	0.49899	0.00942207	Human biased
chr6:53227807	ENSSSCG00000029567:SLC8A2	-	chr19:47965595	SLC8A2	-	0.0114943	0.285714	0.27422	0.000173482	Human biased
chr6:79106337	ENSSSCG00000003512:EIF4G3	-	chr1:21219204	EIF4G3	EIF4G3:ENST00000537738.1:exon4:c.A463G:p.R155G	0.333333	0.136364	-0.19697	0.0050499	Unbiased
chr6:82167339	ENSSSCG00000003543:NIPAL3	-	chr1:24800839	NIPAL3,RCAN3	-	0.201995	0.0714286	-0.130566	0.323505	Unbiased
chr6:82167852	ENSSSCG00000003543:NIPAL3	-	chr1:24801424	NIPAL3,RCAN3	-	0.0666667	0.216049	0.149383	1.05265e-08	Unbiased
chr6:82167935	ENSSSCG00000003543:NIPAL3	-	chr1:24801493	NIPAL3,RCAN3	-	0.0110619	0.131313	0.120251	1.97283e-08	Unbiased
chr6:83553567	ENSSSCG00000030660:PDIK1L	-	chr1:26451293	PDIK1L	-	0.0154143	0.0916031	0.0761888	8.21577e-05	Unbiased
chr6:88785866	ENSSSCG00000003613:HDAC1	-	chr1:32799883	MARCKSL1	-	0.00207095	0.000885347	-0.00118561	0.0117463	Unbiased
chr6:88785868	ENSSSCG00000003613:HDAC1	-	chr1:32799885	MARCKSL1	-	0.00279677	0.00137052	-0.00142625	0.00252218	Unbiased
chr6:88786031	ENSSSCG00000003613:HDAC1	-	chr1:32800048	MARCKSL1	-	0.00151967	0.000844309	-0.000675365	0.133734	Unbiased
chr6:88786036	ENSSSCG00000003613:HDAC1	-	chr1:32800053	MARCKSL1	-	0.0008726	0.0010101	0.000137501	0.693	Unbiased
chr6:108995339	ENSSSCG00000003711:CABYR	-	chr18:21739183	CABYR	-	0.0881226	0.875	0.786877	5.34899e-25	Human biased
chr6:108995417	ENSSSCG00000003711:CABYR	-	chr18:21739263	CABYR	-	0.49	0.86	0.37	1.85304e-11	Human biased
chr6:115966290	ENSSSCG00000003730:RNF138	-	chr18:29702531	RP11-53I6.4	-	0.0374332	0.5	0.462567	0.00187016	Human biased
chr6:118683298	ENSSSCG00000028047:DTNA	-	chr18:32405902	DTNA	-	0.0544218	1	0.945578	5.18079e-19	Human biased
chr6:118683319	ENSSSCG00000028047:DTNA	-	chr18:32405923	DTNA	-	0.375587	0.666667	0.29108	0.0310686	Unbiased
chr6:125970530	ENSSSCG00000003749:PIK3C3	-	chr19:12742892	ZNF791	-	0.2	0.111111	-0.0888889	1	Unbiased
chr7:29996245	ENSSSCG00000001520:LEMD2	ENSSSCG00000001520:ENSSSCT00000001693:S242G;ENSSSCG00000001520:ENSSSCT00000050286:S242G;ENSSSCG00000001520:ENSSSCT00000065334:S242G	chr6:33756242	LEMD2	LEMD2:ENST00000293760.5:exon1:c.A652G:p.S218G	0.0187668	0.0833333	0.0645666	0.225618	Unbiased
chr7:30267188	ENSSSCG00000001523:GRM4	ENSSSCG00000001523:ENSSSCT00000001696:Q124R	chr6:34100903	GRM4	GRM4:ENST00000374181.4:exon1:c.A371G:p.Q124R,GRM4:ENST00000538487.2:exon2:c.A371G:p.Q124R	0.0447761	0.230769	0.185993	0.0335558	Unbiased
chr7:37862310	ENSSSCG00000001646:BICRAL	-	chr6:42758123	GLTSCR1L	-	0.00750469	0.232558	0.225053	1.50666e-09	Human biased
chr7:39162176	ENSSSCG00000001697:TMEM63B	ENSSSCG00000001697:ENSSSCT00000001896:Q619R;ENSSSCG00000001697:ENSSSCT00000036360:Q522R;ENSSSCG00000001697:ENSSSCT00000038739:Q619R;ENSSSCG00000001697:ENSSSCT00000039005:Q606R	chr6:44120349	TMEM63B	TMEM63B:ENST00000259746.9:exon20:c.A1856G:p.Q619R,TMEM63B:ENST00000323267.6:exon20:c.A1856G:p.Q619R	0.158562	0.140244	-0.0183185	0.116389	Unbiased
chr7:56627588	ENSSSCG00000001865:SCAPER	-	chr15:76665621	SCAPER	-	0.0714286	0.25	0.178571	0.175882	Unbiased
chr7:75765251	ENSSSCG00000002023:PABPN1,ENSSSCG00000028190:HOMEZ	-	chr14:23781563	BCL2L2-PABPN1	-	0.0271084	0.103448	0.0763398	0.0626865	Unbiased
chr7:97362434	ENSSSCG00000002357:ALDH6A1	-	chr14:74526236	AC005484.5	-	0.0117005	0.0134702	0.00176971	0.737858	Unbiased
chr7:112318167	ENSSSCG00000002436:TTC7B	-	chr14:91062177	TTC7B	-	0.831325	0.2	-0.631325	0.00568637	Pig biased
chr7:116479794	ENSSSCG00000002494:CLMN	-	chr14:95659656	CLMN	CLMN:ENST00000556441.1:exon3:c.A39G:p.K13K	0.395833	0.19	-0.205833	0.00168798	Pig biased
chr7:121664538	-	-	chr14:101301087	RP11-123M6.2	-	0.0690299	0.0150172	-0.0540127	3.66032e-12	Unbiased
chr7:121681246	-	-	chr14:101317570	RP11-123M6.2	-	0.350968	0.0679553	-0.283012	1.01878e-83	Pig biased
chr7:121684628	-	-	chr14:101320975	RP11-123M6.2	-	0.0334971	0.980265	0.946768	0	Human biased
chr8:1691779	ENSSSCG00000008692:ADD1	-	chr4:2903665	ADD1	-	0.0829694	0.424242	0.341273	2.70167e-06	Human biased
chr8:46206332	ENSSSCG00000024685:GRIA2	ENSSSCG00000024685:ENSSSCT00000022356:Q607R;ENSSSCG00000024685:ENSSSCT00000039120:Q607R;ENSSSCG00000024685:ENSSSCT00000066201:Q607R	chr4:158257875	GRIA2	GRIA2:ENST00000449365.1:exon10:c.A1679G:p.Q560R,GRIA2:ENST00000264426.9:exon11:c.A1820G:p.Q607R,GRIA2:ENST00000296526.7:exon11:c.A1820G:p.Q607R,GRIA2:ENST00000393815.2:exon11:c.A1679G:p.Q560R,GRIA2:ENST00000507898.1:exon11:c.A1679G:p.Q560R	0.996041	0.958004	-0.0380378	1.16646e-28	Unbiased
chr8:46206336	ENSSSCG00000024685:GRIA2	ENSSSCG00000024685:ENSSSCT00000022356:Q608Q;ENSSSCG00000024685:ENSSSCT00000039120:Q608Q;ENSSSCG00000024685:ENSSSCT00000066201:Q608Q	chr4:158257879	GRIA2	GRIA2:ENST00000449365.1:exon10:c.A1683G:p.Q561Q,GRIA2:ENST00000264426.9:exon11:c.A1824G:p.Q608Q,GRIA2:ENST00000296526.7:exon11:c.A1824G:p.Q608Q,GRIA2:ENST00000393815.2:exon11:c.A1683G:p.Q561Q,GRIA2:ENST00000507898.1:exon11:c.A1683G:p.Q561Q	0.0991565	0.135962	0.0368059	2.10997e-05	Unbiased
chr8:46206392	ENSSSCG00000024685:GRIA2	-	chr4:158257935	GRIA2	-	0.65923	0.173913	-0.485317	2.86191e-06	Pig biased
chr8:46206586	ENSSSCG00000024685:GRIA2	-	chr4:158258136	GRIA2	-	0.0614334	0.565217	0.503784	3.09384e-10	Human biased
chr8:46206587	ENSSSCG00000024685:GRIA2	-	chr4:158258137	GRIA2	-	0.412948	0.5	0.0870516	0.477803	Unbiased
chr8:46206588	ENSSSCG00000024685:GRIA2	-	chr4:158258138	GRIA2	-	0.109767	0.142857	0.0330897	0.558687	Unbiased
chr8:46235227	ENSSSCG00000024685:GRIA2	ENSSSCG00000024685:ENSSSCT00000022356:R764G;ENSSSCG00000024685:ENSSSCT00000039120:R764G;ENSSSCG00000024685:ENSSSCT00000066201:R764G	chr4:158281294	GRIA2	GRIA2:ENST00000449365.1:exon12:c.A2149G:p.R717G,GRIA2:ENST00000264426.9:exon13:c.A2290G:p.R764G,GRIA2:ENST00000296526.7:exon13:c.A2290G:p.R764G,GRIA2:ENST00000393815.2:exon13:c.A2149G:p.R717G,GRIA2:ENST00000507898.1:exon13:c.A2149G:p.R717G	0.450861	0.328449	-0.122412	8.56402e-35	Unbiased
chr8:46236457	ENSSSCG00000024685:GRIA2	-	chr4:158282538	GRIA2	-	0.0154506	0.0815603	0.0661096	1.39803e-07	Unbiased
chr8:46236607	ENSSSCG00000024685:GRIA2	-	chr4:158282688	GRIA2	-	0.0434193	0.142857	0.0994379	0.269087	Unbiased
chr8:56357499	ENSSSCG00000008913:IGFBP7	ENSSSCG00000008913:ENSSSCT00000009759:K95R;ENSSSCG00000008913:ENSSSCT00000040094:K95R;ENSSSCG00000008913:ENSSSCT00000047181:K73R	chr4:57976234	IGFBP7	IGFBP7:ENST00000295666.4:exon1:c.A284G:p.K95R,IGFBP7:ENST00000537922.1:exon1:c.A284G:p.K95R	0.873997	0.481481	-0.392516	4.73365e-219	Pig biased
chr8:56357551	ENSSSCG00000008913:IGFBP7	ENSSSCG00000008913:ENSSSCT00000009759:R78G;ENSSSCG00000008913:ENSSSCT00000040094:R78G	chr4:57976286	IGFBP7	IGFBP7:ENST00000295666.4:exon1:c.A232G:p.R78G,IGFBP7:ENST00000537922.1:exon1:c.A232G:p.R78G	0.5125	0.0828465	-0.429653	8.66225e-81	Pig biased
chr9:3243396	-	-	chr11:6513413	TIMM10B	-	0.0444444	0.151515	0.107071	0.118056	Unbiased
chr9:7241856	ENSSSCG00000014817:ARAP1	-	chr11:72400408	ARAP1-AS1	-	0.0502793	0.28022	0.22994	1.86905e-09	Human biased
chr9:17298135	ENSSSCG00000014901:PCF11	-	chr11:82868441	PCF11	-	0.213783	0.127841	-0.0859425	0.000577433	Unbiased
chr9:35752568	ENSSSCG00000030565:GRIA4	ENSSSCG00000030565:ENSSSCT00000027751:R765G;ENSSSCG00000030565:ENSSSCT00000037154:R765G;ENSSSCG00000030565:ENSSSCT00000042517:R765G;ENSSSCG00000030565:ENSSSCT00000054101:R765G;ENSSSCG00000030565:ENSSSCT00000058908:R765G	chr11:105804694	GRIA4	GRIA4:ENST00000525187.1:exon13:c.A2293G:p.R765G,GRIA4:ENST00000530497.1:exon13:c.A2293G:p.R765G,GRIA4:ENST00000282499.5:exon14:c.A2293G:p.R765G,GRIA4:ENST00000393127.2:exon14:c.A2293G:p.R765G	0.736772	0.416873	-0.319899	1.75214e-26	Pig biased
chr9:35763448	ENSSSCG00000030565:GRIA4	-	chr11:105815096	GRIA4	-	0.0328947	0.333333	0.300439	0.0175471	Unbiased
chr9:44654715	ENSSSCG00000015079:BACE1	-	chr11:117173557	BACE1	-	0.0454545	0.8	0.754545	0.000341395	Human biased
chr9:46026507	ENSSSCG00000015097:DDX6	-	chr11:118619352	AP002954.4	-	0.0925856	0.0385095	-0.0540761	5.28695e-22	Unbiased
chr9:46824458	ENSSSCG00000015125:NECTIN1	-	chr11:119532688	PVRL1	-	0.0471406	0.122802	0.0756617	1.66655e-16	Unbiased
chr9:67110260	ENSSSCG00000015645:ENSSSCG00000015645	-	chr1:206630935	SRGAP2	-	0.0165746	0.515464	0.498889	3.02705e-24	Human biased
chrX:10430512	ENSSSCG00000012126:ENSSSCG00000012126	-	chrX:13790128	GPM6B	-	0.0320727	0.0370038	0.00493106	0.0112722	Unbiased
chrX:57465689	ENSSSCG00000027115:ENSSSCG00000027115	-	chrX:70684858	TAF1	-	0.0529595	0.316327	0.263367	7.35349e-11	Human biased
chrX:94053730	ENSSSCG00000012593:HTR2C	-	chrX:113818832	HTR2C	-	0.202279	0.382353	0.180074	0.00251923	Unbiased
chrX:94259444	ENSSSCG00000012593:HTR2C	ENSSSCG00000012593:ENSSSCT00000035084:I156V	chrX:114082682	HTR2C	HTR2C:ENST00000276198.1:exon5:c.A466G:p.I156V,HTR2C:ENST00000371951.1:exon6:c.A466G:p.I156V	0.619048	0.833333	0.214286	0.108549	Unbiased
chrX:94259446	ENSSSCG00000012593:HTR2C	ENSSSCG00000012593:ENSSSCT00000035084:I156M	chrX:114082684	HTR2C	HTR2C:ENST00000276198.1:exon5:c.A468G:p.I156M,HTR2C:ENST00000371951.1:exon6:c.A468G:p.I156M	0.210938	0.363636	0.152699	0.169355	Unbiased
chrX:94259450	ENSSSCG00000012593:HTR2C	ENSSSCG00000012593:ENSSSCT00000035084:N158D	chrX:114082688	HTR2C	HTR2C:ENST00000276198.1:exon5:c.A472G:p.N158D,HTR2C:ENST00000371951.1:exon6:c.A472G:p.N158D	0.173228	0.166667	-0.00656168	1	Unbiased
chrX:94259451	ENSSSCG00000012593:HTR2C	ENSSSCG00000012593:ENSSSCT00000035084:N158S	chrX:114082689	HTR2C	HTR2C:ENST00000276198.1:exon5:c.A473G:p.N158S,HTR2C:ENST00000371951.1:exon6:c.A473G:p.N158S	0.495726	0.4375	-0.0582265	0.791627	Unbiased
chrX:94259456	ENSSSCG00000012593:HTR2C	ENSSSCG00000012593:ENSSSCT00000035084:I160V	chrX:114082694	HTR2C	HTR2C:ENST00000276198.1:exon5:c.A478G:p.I160V,HTR2C:ENST00000371951.1:exon6:c.A478G:p.I160V	0.703704	0.357143	-0.346561	0.00089692	Pig biased
chrX:94311786	ENSSSCG00000012593:HTR2C	-	chrX:114143037	HTR2C	-	0.0456274	0.0895522	0.0439249	0.222129	Unbiased
chrX:98254413	-	-	chrX:119055933	RP3-327A19.5	-	0.0385965	0.153846	0.11525	0.104444	Unbiased
chrX:101083849	ENSSSCG00000012638:GRIA3	ENSSSCG00000012638:ENSSSCT00000013819:R775G;ENSSSCG00000012638:ENSSSCT00000032933:R775G;ENSSSCG00000012638:ENSSSCT00000036560:R775G	chrX:122598962	GRIA3	GRIA3:ENST00000264357.5:exon13:c.A2323G:p.R775G,GRIA3:ENST00000371251.1:exon13:c.A2323G:p.R775G,GRIA3:ENST00000371256.5:exon13:c.A2323G:p.R775G,GRIA3:ENST00000542149.1:exon13:c.A2323G:p.R775G	0.916066	0.802902	-0.113164	8.95919e-18	Unbiased
chrX:101083885	ENSSSCG00000012638:GRIA3	-	chrX:122598998	AL356213.1	-	0.4	0.340909	-0.0590909	0.519116	Unbiased
chrX:101099544	ENSSSCG00000012638:GRIA3	-	chrX:122614727	GRIA3	-	0.0731567	0.222222	0.149066	0.138743	Unbiased
chrX:123475359	ENSSSCG00000025708:GABRA3	ENSSSCG00000025708:ENSSSCT00000024798:I342M;ENSSSCG00000025708:ENSSSCT00000040116:I342M;ENSSSCG00000025708:ENSSSCT00000055760:I291M	chrX:151358319	GABRA3	GABRA3:ENST00000370314.4:exon9:c.A1026G:p.I342M,GABRA3:ENST00000535043.1:exon9:c.A1026G:p.I342M	0.938911	0.673152	-0.265759	2.79571e-34	Pig biased
chrX:124912200	ENSSSCG00000033299:ENSSSCG00000033299	-	chrX:153579736	FLNA	-	0.5	0.0334448	-0.466555	9.67426e-09	Pig biased

## Sheet: Table S3d
Table S3d. List of conserved editing sites in Hypothalamus
Coordinate in Pig Genome	Pig Gene	Amino Acid Change in Pig	Coordinate in Human Genome	Human Gene	Amino Acid Change in Human	Editing level in Pig	Editing level in Human	Delta editing level	P value	Type
chr1:49419160	ENSSSCG00000004270:ADGRB3	-	chr6:69882978	BAI3	-	0.166667	0.153846	-0.0128205	1	Unbiased
chr1:50736674	ENSSSCG00000004276:SMAP1	-	chr6:71298937	C6orf57	-	0.411765	0.0441459	-0.367619	3.58021e-10	Pig biased
chr1:50736742	ENSSSCG00000004276:SMAP1	-	chr6:71299053	C6orf57	-	0.378378	0.181045	-0.197333	0.00826654	Unbiased
chr1:50736743	ENSSSCG00000004276:SMAP1	-	chr6:71299054	C6orf57	-	0.416667	0.135957	-0.28071	0.000824445	Pig biased
chr1:50736757	ENSSSCG00000004276:SMAP1	-	chr6:71299066	C6orf57	-	0.416667	0.0478723	-0.368794	0.00019618	Pig biased
chr1:68530727	ENSSSCG00000004361:GRIK2	ENSSSCG00000004361:ENSSSCT00000004819:I518V;ENSSSCG00000004361:ENSSSCT00000032833:I518V	chr6:102337689	GRIK2	GRIK2:ENST00000318991.6:exon11:c.A1699G:p.I567V,GRIK2:ENST00000369134.4:exon11:c.A1552G:p.I518V,GRIK2:ENST00000369138.1:exon11:c.A1699G:p.I567V,GRIK2:ENST00000413795.1:exon11:c.A1699G:p.I567V,GRIK2:ENST00000421544.1:exon11:c.A1699G:p.I567V	0.330709	0.445652	0.114944	0.00459295	Unbiased
chr1:68530740	ENSSSCG00000004361:GRIK2	ENSSSCG00000004361:ENSSSCT00000004819:Y522C;ENSSSCG00000004361:ENSSSCT00000032833:Y522C	chr6:102337702	GRIK2	GRIK2:ENST00000318991.6:exon11:c.A1712G:p.Y571C,GRIK2:ENST00000369134.4:exon11:c.A1565G:p.Y522C,GRIK2:ENST00000369138.1:exon11:c.A1712G:p.Y571C,GRIK2:ENST00000413795.1:exon11:c.A1712G:p.Y571C,GRIK2:ENST00000421544.1:exon11:c.A1712G:p.Y571C	0.540773	0.655738	0.114965	0.00590524	Unbiased
chr1:68540764	ENSSSCG00000004361:GRIK2	-	chr6:102347627	GRIK2	-	0.0993789	1	0.900621	2.71201e-06	Human biased
chr1:68564368	ENSSSCG00000004361:GRIK2	ENSSSCG00000004361:ENSSSCT00000004819:G566G;ENSSSCG00000004361:ENSSSCT00000032833:G566G	chr6:102372572	GRIK2	GRIK2:ENST00000318991.6:exon12:c.A1845G:p.G615G,GRIK2:ENST00000369134.4:exon12:c.A1698G:p.G566G,GRIK2:ENST00000369138.1:exon12:c.A1845G:p.G615G,GRIK2:ENST00000413795.1:exon12:c.A1845G:p.G615G,GRIK2:ENST00000421544.1:exon12:c.A1845G:p.G615G	0.381877	0.201299	-0.180578	4.72688e-08	Unbiased
chr1:68564385	ENSSSCG00000004361:GRIK2	ENSSSCG00000004361:ENSSSCT00000004819:Q572R;ENSSSCG00000004361:ENSSSCT00000032833:Q572R	chr6:102372589	GRIK2	GRIK2:ENST00000318991.6:exon12:c.A1862G:p.Q621R,GRIK2:ENST00000369134.4:exon12:c.A1715G:p.Q572R,GRIK2:ENST00000369138.1:exon12:c.A1862G:p.Q621R,GRIK2:ENST00000413795.1:exon12:c.A1862G:p.Q621R,GRIK2:ENST00000421544.1:exon12:c.A1862G:p.Q621R	0.724796	0.671128	-0.0536675	0.0900114	Unbiased
chr1:68564426	ENSSSCG00000004361:GRIK2	-	chr6:102372630	GRIK2	-	0.682796	0.875	0.192204	0.43874	Unbiased
chr1:68564478	ENSSSCG00000004361:GRIK2	-	chr6:102372682	GRIK2	-	0.0619048	0.272727	0.210823	0.0360892	Unbiased
chr1:68564727	ENSSSCG00000004361:GRIK2	-	chr6:102372931	GRIK2	-	0.769231	0.275862	-0.493369	8.71164e-06	Pig biased
chr1:68566288	ENSSSCG00000004361:GRIK2	-	chr6:102374553	GRIK2	-	0.251366	0.38835	0.136983	0.00471664	Unbiased
chr1:68566294	ENSSSCG00000004361:GRIK2	-	chr6:102374559	GRIK2	-	0.111765	0.218391	0.106626	0.00893738	Unbiased
chr1:68566307	ENSSSCG00000004361:GRIK2	-	chr6:102374572	GRIK2	-	0.221239	0.911917	0.690678	5.55962e-36	Human biased
chr1:68566337	ENSSSCG00000004361:GRIK2	-	chr6:102374602	GRIK2	-	0.142857	0.153846	0.010989	1	Unbiased
chr1:68566351	ENSSSCG00000004361:GRIK2	-	chr6:102374616	GRIK2	-	0.67619	0.933884	0.257694	2.39138e-09	Human biased
chr1:68566369	ENSSSCG00000004361:GRIK2	-	chr6:102374634	GRIK2	-	0.175926	0.373494	0.197568	0.000183689	Unbiased
chr1:68566378	ENSSSCG00000004361:GRIK2	-	chr6:102374643	GRIK2	-	0.892857	0.995851	0.102993	6.473e-06	Unbiased
chr1:98356728	ENSSSCG00000004506:CTIF	-	chr18:46286834	CTIF	-	0.173913	0.255319	0.0814061	0.459392	Unbiased
chr1:122573868	ENSSSCG00000004652:COPS2	-	chr15:49418958	COPS2	-	0.0485437	0.0350877	-0.013456	1	Unbiased
chr1:163170088	ENSSSCG00000004926:PDCD7	ENSSSCG00000004926:ENSSSCT00000005436:Q43R	chr15:65425992	PDCD7	PDCD7:ENST00000204549.4:exon1:c.A128G:p.Q43R	0.0416667	0.238095	0.196429	5.45167e-06	Unbiased
chr1:163170163	ENSSSCG00000004926:PDCD7	ENSSSCG00000004926:ENSSSCT00000005436:Q18R	chr15:65426067	PDCD7	PDCD7:ENST00000204549.4:exon1:c.A53G:p.Q18R	0.25098	0.257143	0.00616246	0.894644	Unbiased
chr1:268764115	ENSSSCG00000005646:COQ4	-	chr9:131092597	COQ4	-	0.0909091	0.384615	0.293706	0.00176574	Human biased
chr1:268764160	ENSSSCG00000005646:COQ4	-	chr9:131092632	COQ4	-	0.0447761	0.2	0.155224	0.0714555	Unbiased
chr12:24199758	ENSSSCG00000032782:PNPO	-	chr17:46025034	RP11-6N17.6,RP11-6N17.9	-	0.547529	0.0276243	-0.519904	1.3606e-35	Pig biased
chr12:24199880	ENSSSCG00000032782:PNPO	-	chr17:46025242	RP11-6N17.6,RP11-6N17.9	-	0.0562249	0.0104987	-0.0457262	0.00105505	Unbiased
chr12:34246815	ENSSSCG00000017623:VEZF1	-	chr17:56049824	CUEDC1,VEZF1	-	0.597222	0.257242	-0.33998	6.53247e-15	Pig biased
chr12:34246816	ENSSSCG00000017623:VEZF1	-	chr17:56049825	CUEDC1,VEZF1	-	0.244755	0.101904	-0.142852	1.15473e-05	Unbiased
chr12:34246820	ENSSSCG00000017623:VEZF1	-	chr17:56049829	CUEDC1,VEZF1	-	0.0977011	0.314108	0.216407	2.3793e-10	Human biased
chr12:35076320	ENSSSCG00000038932:PPM1E	-	chr17:56856786	PPM1E	-	0	0.4	0.4	0.0735294	Unbiased
chr12:44410166	ENSSSCG00000017756:NLK	-	chr17:26375487	NLK	-	0.0277778	0.209302	0.181525	0.00222788	Unbiased
chr12:44855233	-	-	chr17:26936879	SPAG5-AS1	-	0.137931	0.490909	0.352978	0.00176778	Human biased
chr12:44855248	-	-	chr17:26936898	SPAG5-AS1	-	0.553191	0.787234	0.234043	0.0274284	Unbiased
chr12:44977479	ENSSSCG00000032658:TRAF4	-	chr17:27072836	AC010761.9	-	0.181818	0.457143	0.275325	0.113951	Unbiased
chr12:53126165	ENSSSCG00000021363:CHD3	-	chr17:7772599	LSMD1	-	0.3	0.73913	0.43913	0.02593	Unbiased
chr13:2639980	ENSSSCG00000011190:METTL6	-	chr3:15454240	METTL6	-	0.0526316	0.404494	0.351863	4.10804e-09	Human biased
chr13:35884880	ENSSSCG00000011455:CACNA1D	ENSSSCG00000011455:ENSSSCT00000012536:I1660M	chr3:53820892	CACNA1D	CACNA1D:ENST00000540742.1:exon14:c.A1512G:p.I504M,CACNA1D:ENST00000422281.2:exon39:c.A4791G:p.I1597M,CACNA1D:ENST00000350061.5:exon40:c.A4836G:p.I1612M,CACNA1D:ENST00000288139.4:exon41:c.A4896G:p.I1632M	0.114286	0.24031	0.126024	0.00962266	Unbiased
chr13:39922407	ENSSSCG00000011471:FLNB	ENSSSCG00000011471:ENSSSCT00000012553:Q2243R;ENSSSCG00000011471:ENSSSCT00000040435:Q2327R;ENSSSCG00000011471:ENSSSCT00000044709:Q2303R;ENSSSCG00000011471:ENSSSCT00000064169:Q2296R	chr3:58141801	FLNB	FLNB:ENST00000493452.1:exon39:c.A6308G:p.Q2103R,FLNB:ENST00000348383.5:exon40:c.A6764G:p.Q2255R,FLNB:ENST00000358537.3:exon40:c.A6815G:p.Q2272R,FLNB:ENST00000419752.2:exon40:c.A6347G:p.Q2116R,FLNB:ENST00000295956.4:exon41:c.A6887G:p.Q2296R,FLNB:ENST00000429972.2:exon41:c.A6854G:p.Q2285R,FLNB:ENST00000490882.1:exon42:c.A6980G:p.Q2327R	0.122388	0.0711538	-0.0512342	0.004439	Unbiased
chr13:40073139	ENSSSCG00000035452:HTD2	-	chr3:58304278	RPP14	-	0.00835655	0.112426	0.104069	1.10886e-07	Unbiased
chr13:40073242	ENSSSCG00000035452:HTD2	-	chr3:58304471	RPP14	-	0.0206186	0.107843	0.0872246	0.0188848	Unbiased
chr13:44018551	ENSSSCG00000011489:CADPS	-	chr3:62422395	CADPS	-	0.0694444	0.4	0.330556	0.0625847	Unbiased
chr13:44020000	ENSSSCG00000011489:CADPS	ENSSSCG00000011489:ENSSSCT00000012572:E1267G;ENSSSCG00000011489:ENSSSCT00000044538:E1242G;ENSSSCG00000011489:ENSSSCT00000066159:E1251G	chr3:62423807	CADPS	CADPS:ENST00000357948.3:exon25:c.A3512G:p.E1171G,CADPS:ENST00000283269.9:exon26:c.A3632G:p.E1211G,CADPS:ENST00000383710.4:exon28:c.A3749G:p.E1250G	0.424165	0.497328	0.0731635	0.00699954	Unbiased
chr13:44087317	ENSSSCG00000011489:CADPS	-	chr3:62487168	CADPS	-	0	0.333333	0.333333	0.0202429	Unbiased
chr13:44087784	ENSSSCG00000011489:CADPS	-	chr3:62487627	CADPS	-	0.3	1	0.7	0.025641	Unbiased
chr13:44481409	ENSSSCG00000011489:CADPS	ENSSSCG00000011489:ENSSSCT00000012572:S92G;ENSSSCG00000011489:ENSSSCT00000044538:S92G;ENSSSCG00000011489:ENSSSCT00000066159:S92G	chr3:62860434	CADPS	CADPS:ENST00000283269.9:exon1:c.A271G:p.S91G,CADPS:ENST00000357948.3:exon1:c.A271G:p.S91G,CADPS:ENST00000383710.4:exon1:c.A271G:p.S91G,CADPS:ENST00000490353.2:exon1:c.A271G:p.S91G	0.0232558	0.0606061	0.0373502	0.248369	Unbiased
chr13:53081395	-	-	chr3:71729589	EIF4E3	-	0.174797	0.103704	-0.071093	0.071839	Unbiased
chr13:69433108	ENSSSCG00000036643:ENSSSCG00000036643	-	chr3:15113852	ZFYVE20	-	0.0104167	0.0588235	0.0484069	0.182005	Unbiased
chr13:80226718	ENSSSCG00000011662:COPB2,ENSSSCG00000035771:MRPS22	-	chr3:139074203	MRPS22	-	0.317757	0.0338983	-0.283859	7.49506e-06	Pig biased
chr13:80226719	ENSSSCG00000011662:COPB2,ENSSSCG00000035771:MRPS22	-	chr3:139074204	MRPS22	-	0.0442478	0.0224719	-0.0217759	0.468483	Unbiased
chr13:80226720	ENSSSCG00000011662:COPB2,ENSSSCG00000035771:MRPS22	-	chr3:139074205	MRPS22	-	0.0275229	0.0565611	0.0290382	0.32838	Unbiased
chr13:117429056	ENSSSCG00000039285:MFN1	ENSSSCG00000039285:ENSSSCT00000039446:I328V	chr3:179093014	MFN1	MFN1:ENST00000263969.5:exon9:c.A982G:p.I328V,MFN1:ENST00000280653.7:exon10:c.A982G:p.I328V,MFN1:ENST00000471841.1:exon10:c.A982G:p.I328V	0.0391459	0.211982	0.172836	8.17489e-13	Unbiased
chr13:117626717	ENSSSCG00000011762:ACTL6A,ENSSSCG00000011763:MRPL47	-	chr3:179305564	ACTL6A	-	0.0180723	0.4	0.381928	0.00663786	Human biased
chr13:192926833	ENSSSCG00000025119:GRIK1	-	chr21:30952144	GRIK1	-	0.4	0.8	0.4	0.0872208	Unbiased
chr13:192928491	ENSSSCG00000025119:GRIK1	ENSSSCG00000025119:ENSSSCT00000028121:Q636R;ENSSSCG00000025119:ENSSSCT00000045911:Q621R;ENSSSCG00000025119:ENSSSCT00000055117:Q621R;ENSSSCG00000025119:ENSSSCT00000055366:Q621R	chr21:30953750	GRIK1	GRIK1:ENST00000389125.3:exon12:c.A1862G:p.Q621R,GRIK1:ENST00000399909.1:exon12:c.A1862G:p.Q621R,GRIK1:ENST00000399914.1:exon12:c.A1862G:p.Q621R,GRIK1:ENST00000327783.4:exon13:c.A1907G:p.Q636R,GRIK1:ENST00000389124.2:exon13:c.A1907G:p.Q636R,GRIK1:ENST00000399907.1:exon13:c.A1907G:p.Q636R,GRIK1:ENST00000399913.1:exon13:c.A1907G:p.Q636R,GRIK1:ENST00000309434.7:exon14:c.A1913G:p.Q638R,GRIK1:ENST00000…	0.318681	0.668374	0.349693	1.35737e-17	Human biased
chr13:197168371	ENSSSCG00000023674:SON	ENSSSCG00000023674:ENSSSCT00000026483:T274A;ENSSSCG00000023674:ENSSSCT00000060699:T413A;ENSSSCG00000023674:ENSSSCT00000063351:T413A;ENSSSCG00000023674:ENSSSCT00000065483:T413A	chr21:34922801	SON	SON:ENST00000290239.6:exon3:c.A1264G:p.T422A,SON:ENST00000300278.4:exon3:c.A1264G:p.T422A,SON:ENST00000356577.4:exon3:c.A1264G:p.T422A,SON:ENST00000381679.4:exon3:c.A1264G:p.T422A	0.029735	0.0928962	0.0631612	0.000157112	Unbiased
chr13:197168826	ENSSSCG00000023674:SON	ENSSSCG00000023674:ENSSSCT00000026483:P425P;ENSSSCG00000023674:ENSSSCT00000060699:P564P;ENSSSCG00000023674:ENSSSCT00000063351:P564P;ENSSSCG00000023674:ENSSSCT00000065483:P564P	chr21:34923256	SON	SON:ENST00000290239.6:exon3:c.A1719G:p.P573P,SON:ENST00000300278.4:exon3:c.A1719G:p.P573P,SON:ENST00000356577.4:exon3:c.A1719G:p.P573P,SON:ENST00000381679.4:exon3:c.A1719G:p.P573P	0.0992126	0.105072	0.00585987	0.811196	Unbiased
chr13:197168845	ENSSSCG00000023674:SON	ENSSSCG00000023674:ENSSSCT00000026483:R432G;ENSSSCG00000023674:ENSSSCT00000060699:R571G;ENSSSCG00000023674:ENSSSCT00000063351:R571G;ENSSSCG00000023674:ENSSSCT00000065483:R571G	chr21:34923275	SON	SON:ENST00000290239.6:exon3:c.A1738G:p.R580G,SON:ENST00000300278.4:exon3:c.A1738G:p.R580G,SON:ENST00000356577.4:exon3:c.A1738G:p.R580G,SON:ENST00000381679.4:exon3:c.A1738G:p.R580G	0.279582	0.107744	-0.171838	2.48531e-10	Unbiased
chr14:49312253	ENSSSCG00000010052:BCR	-	chr22:23649339	BCR	-	0.2	0.166667	-0.0333333	1	Unbiased
chr14:51473632	ENSSSCG00000010135:DGCR8,ENSSSCG00000029742:ENSSSCG00000029742	-	chr22:20073330	MIR3618	-	0.295082	0.192308	-0.102774	0.342635	Unbiased
chr14:76260957	ENSSSCG00000010301:PPP3CB	-	chr10:75207299	PPP3CB	-	0.25641	0.1875	-0.0689103	0.734227	Unbiased
chr14:80105988	ENSSSCG00000010325:KCNMA1	ENSSSCG00000010325:ENSSSCT00000056413:S11G	chr10:79397298	KCNMA1	KCNMA1:ENST00000286627.5:exon1:c.A103G:p.S35G,KCNMA1:ENST00000286628.8:exon1:c.A103G:p.S35G,KCNMA1:ENST00000354353.5:exon1:c.A103G:p.S35G,KCNMA1:ENST00000372440.1:exon1:c.A103G:p.S35G,KCNMA1:ENST00000372443.1:exon1:c.A103G:p.S35G,KCNMA1:ENST00000404771.3:exon1:c.A103G:p.S35G,KCNMA1:ENST00000404857.1:exon1:c.A103G:p.S35G,KCNMA1:ENST00000406533.3:exon1:c.A103G:p.S35G,KCNMA1:ENST00000480683.1:exon1:…	0.0363636	0.151361	0.114997	3.07428e-10	Unbiased
chr14:110540447	ENSSSCG00000010536:CNNM1	ENSSSCG00000010536:ENSSSCT00000011526:S237G;ENSSSCG00000010536:ENSSSCT00000050252:S237G;ENSSSCG00000010536:ENSSSCT00000055954:S237G	chr10:101089862	CNNM1	CNNM1:ENST00000356713.4:exon1:c.A718G:p.S240G,CNNM1:ENST00000370528.3:exon3:c.A505G:p.S169G,CNNM1:ENST00000446890.1:exon3:c.A505G:p.S169G	0.465116	0.214286	-0.250831	0.0900943	Unbiased
chr14:111355216	ENSSSCG00000010550:CWF19L1	-	chr10:101992805	RP11-316M21.6	-	0.0325733	0.103401	0.0708281	6.45233e-05	Unbiased
chr14:111355286	ENSSSCG00000010550:CWF19L1	-	chr10:101992843	RP11-316M21.6	-	0.0236842	0.0344828	0.0107985	0.524778	Unbiased
chr14:111355330	ENSSSCG00000010550:CWF19L1	-	chr10:101992867	RP11-316M21.6	-	0.012474	0.102941	0.0904672	1.61596e-09	Unbiased
chr15:48249999	ENSSSCG00000015819:PLPP5	-	chr8:38122542	PPAPDC1B	-	0	0.164634	0.164634	0.364812	Unbiased
chr15:95565190	ENSSSCG00000016056:GLS	-	chr2:191799592	GLS	-	0.0238095	0.0961538	0.0723443	1.41811e-07	Unbiased
chr15:110909564	ENSSSCG00000024696:ENSSSCG00000024696	-	chr2:208619252	CCNYL1	-	0.0215517	0.027027	0.0054753	0.677209	Unbiased
chr15:110910350	ENSSSCG00000024696:ENSSSCG00000024696	-	chr19:28477037	LLNLF-65H9.1,CTD-2043I16.1	-	0.125	1	0.875	1.57194e-07	Human biased
chr15:110910352	ENSSSCG00000024696:ENSSSCG00000024696	-	chr19:28477039	LLNLF-65H9.1,CTD-2043I16.1	-	0.409091	1	0.590909	0.00159974	Human biased
chr15:110910358	ENSSSCG00000024696:ENSSSCG00000024696	-	chr2:208620045	CCNYL1	-	0.857143	0.0384615	-0.818681	1.56813e-09	Pig biased
chr15:110910482	ENSSSCG00000024696:ENSSSCG00000024696	-	chr2:208620129	CCNYL1	-	0.0504202	0.119718	0.0692981	0.0431427	Unbiased
chr15:110910487	ENSSSCG00000024696:ENSSSCG00000024696	-	chr2:208620134	CCNYL1	-	0.0849057	0.0510204	-0.0338853	0.412566	Unbiased
chr15:112687180	ENSSSCG00000016153:UNC80	ENSSSCG00000016153:ENSSSCT00000017586:S2662G;ENSSSCG00000016153:ENSSSCT00000030483:S2730G	chr2:210835613	UNC80	UNC80:ENST00000539183.1:exon4:c.A328G:p.S110G,UNC80:ENST00000272845.6:exon53:c.A7975G:p.S2659G,UNC80:ENST00000439458.1:exon53:c.A7990G:p.S2664G	0.146465	0.134921	-0.011544	0.884124	Unbiased
chr15:118296733	ENSSSCG00000022758:PECR	-	chr2:216903561	PECR	-	0.236607	0.18254	-0.0540675	0.174491	Unbiased
chr15:118296837	ENSSSCG00000022758:PECR	-	chr2:216903629	PECR	-	0.0320513	0.148936	0.116885	0.00732492	Unbiased
chr17:26374997	ENSSSCG00000007088:ENSSSCG00000007088,ENSSSCG00000018309:ENSSSCG00000018309	-	chr20:17943427	SNORD17	-	0.0677448	0.125	0.0572552	0.298486	Unbiased
chr17:31852360	ENSSSCG00000007143:MAVS	-	chr20:3851549	MAVS,RP11-119B16.2	-	0.136364	0.0304348	-0.105929	0.0464801	Unbiased
chr17:35263308	ENSSSCG00000007228:HM13	-	chr20:30126775	HM13	-	0.666667	0.254902	-0.411765	0.000942212	Pig biased
chr17:35263355	ENSSSCG00000007228:HM13	-	chr20:30126822	HM13	-	0.241379	0.111111	-0.130268	0.650317	Unbiased
chr17:39475632	ENSSSCG00000007314:ENSSSCG00000007314	-	chr20:34803141	EPB41L1	-	0.0232558	0.4	0.376744	0.000235962	Human biased
chr17:40509602	ENSSSCG00000007334:SRC	-	chr20:36018604	SRC	-	0.0909091	0.166667	0.0757576	0.667234	Unbiased
chr17:40625064	ENSSSCG00000037248:ENSSSCG00000037248	-	chr20:36147533	BLCAP	BLCAP:ENST00000373537.2:exon2:c.A44G:p.K15R,BLCAP:ENST00000397131.1:exon2:c.A44G:p.K15R,BLCAP:ENST00000397134.1:exon2:c.A44G:p.K15R,BLCAP:ENST00000397135.1:exon2:c.A44G:p.K15R,BLCAP:ENST00000397137.1:exon2:c.A44G:p.K15R,BLCAP:ENST00000414542.2:exon3:c.A44G:p.K15R	0.268254	0.0694254	-0.198829	1.21705e-141	Unbiased
chr17:40625094	ENSSSCG00000037248:ENSSSCG00000037248	-	chr20:36147563	BLCAP	BLCAP:ENST00000373537.2:exon2:c.A14G:p.Q5R,BLCAP:ENST00000397131.1:exon2:c.A14G:p.Q5R,BLCAP:ENST00000397134.1:exon2:c.A14G:p.Q5R,BLCAP:ENST00000397135.1:exon2:c.A14G:p.Q5R,BLCAP:ENST00000397137.1:exon2:c.A14G:p.Q5R,BLCAP:ENST00000414542.2:exon3:c.A14G:p.Q5R	0.280139	0.0999829	-0.180156	1.21556e-129	Unbiased
chr17:40625103	ENSSSCG00000037248:ENSSSCG00000037248	-	chr20:36147572	BLCAP	BLCAP:ENST00000373537.2:exon2:c.A5G:p.Y2C,BLCAP:ENST00000397131.1:exon2:c.A5G:p.Y2C,BLCAP:ENST00000397134.1:exon2:c.A5G:p.Y2C,BLCAP:ENST00000397135.1:exon2:c.A5G:p.Y2C,BLCAP:ENST00000397137.1:exon2:c.A5G:p.Y2C,BLCAP:ENST00000414542.2:exon3:c.A5G:p.Y2C	0.366424	0.156369	-0.210055	7.378e-125	Pig biased
chr17:40625112	ENSSSCG00000037248:ENSSSCG00000037248	-	chr20:36147581	BLCAP	-	0.0120376	0.00239617	-0.00964148	0.00106649	Unbiased
chr17:40625114	ENSSSCG00000037248:ENSSSCG00000037248	-	chr20:36147583	BLCAP	-	0.00997354	0.00448632	-0.00548722	0.0162883	Unbiased
chr17:40625575	ENSSSCG00000037248:ENSSSCG00000037248	-	chr20:36148080	BLCAP	-	0.697674	0.538462	-0.159213	0.205517	Unbiased
chr17:40625638	ENSSSCG00000037248:ENSSSCG00000037248	-	chr20:36148143	BLCAP	-	0.442623	0.291667	-0.150956	0.22827	Unbiased
chr17:48092321	ENSSSCG00000007435:ENSSSCG00000007435	-	chr20:44530673	PLTP	-	0.0757576	0.2	0.124242	0.365596	Unbiased
chr17:48340028	ENSSSCG00000007439:CDH22,ENSSSCG00000007452:TP53RK	-	chr20:44802727	CDH22	-	0.68	0.143466	-0.536534	4.14165e-16	Pig biased
chr17:48340029	ENSSSCG00000007439:CDH22,ENSSSCG00000007452:TP53RK	-	chr20:44802728	CDH22	-	0.971014	0.324974	-0.646041	1.71284e-28	Pig biased
chr17:54558411	ENSSSCG00000034702:ENSSSCG00000034702	-	chr20:52104716	RP5-823G15.5	-	0	0.268293	0.268293	0.0930115	Unbiased
chr17:54558417	ENSSSCG00000034702:ENSSSCG00000034702	-	chr20:52104722	RP5-823G15.5	-	0.0909091	0.305085	0.214176	0.267043	Unbiased
chr17:54558438	ENSSSCG00000034702:ENSSSCG00000034702	-	chr20:52104743	RP5-823G15.5	-	0.1	0.416667	0.316667	0.130218	Unbiased
chr17:54558517	ENSSSCG00000034702:ENSSSCG00000034702	-	chr20:52104822	RP5-823G15.5	-	0.181818	0.583333	0.401515	0.0893795	Unbiased
chr17:54558536	ENSSSCG00000034702:ENSSSCG00000034702	-	chr20:52104841	RP5-823G15.5	-	0.463415	0.586207	0.122792	0.341438	Unbiased
chr17:54558613	ENSSSCG00000034702:ENSSSCG00000034702	-	chr20:52104918	RP5-823G15.5	-	0.228916	0.393443	0.164527	0.0426985	Unbiased
chr18:6145761	ENSSSCG00000021475:SLC4A2,ENSSSCG00000024184:FASTK	-	chr7:150777387	FASTK	-	0	0.132075	0.132075	2.21606e-05	Unbiased
chr18:19121574	ENSSSCG00000016566:NRF1	-	chr7:129272287	NRF1	-	0.0598291	0.314286	0.254457	5.85546e-06	Human biased
chr18:19121888	ENSSSCG00000016566:NRF1	-	chr7:129272054	NRF1	-	0.0243902	0.390625	0.366235	2.86305e-12	Human biased
chr3:87350343	ENSSSCG00000008413:GPR75	-	chr2:54076334	MIR3682	-	0.181609	0.265915	0.0843054	6.19604e-06	Unbiased
chr3:103092104	ENSSSCG00000008496:EIF2AK2	-	chr2:37329350	EIF2AK2	-	0.51682	0.0288462	-0.487973	6.92501e-23	Pig biased
chr3:103093488	ENSSSCG00000008496:EIF2AK2	-	chr2:37328075	EIF2AK2	-	0.177099	0.588315	0.411216	1.80427e-73	Human biased
chr3:103093534	ENSSSCG00000008496:EIF2AK2	-	chr2:37328029	EIF2AK2	-	0.00744048	0.015	0.00755952	0.393536	Unbiased
chr3:103093549	ENSSSCG00000008496:EIF2AK2	-	chr2:37328014	EIF2AK2	-	0.0640569	0.0220126	-0.0420444	0.00518326	Unbiased
chr3:103093559	ENSSSCG00000008496:EIF2AK2	-	chr2:37328000	EIF2AK2	-	0.00492611	0.0247191	0.019793	0.00320014	Unbiased
chr3:103093996	ENSSSCG00000008496:EIF2AK2	-	chr2:37327675	EIF2AK2	-	0.222951	0.0149254	-0.208025	2.82955e-13	Pig biased
chr3:103094017	ENSSSCG00000008496:EIF2AK2	-	chr2:37327650	EIF2AK2	-	0.00701754	0.0169492	0.00993161	0.322261	Unbiased
chr3:103094019	ENSSSCG00000008496:EIF2AK2	-	chr2:37327648	EIF2AK2	-	0.0985401	0.0472103	-0.0513298	0.00309196	Unbiased
chr3:103094025	ENSSSCG00000008496:EIF2AK2	-	chr2:37327642	EIF2AK2	-	0.0275862	0.0284091	0.000822884	1	Unbiased
chr3:103094026	ENSSSCG00000008496:EIF2AK2	-	chr2:37327641	EIF2AK2	-	0.00352113	0.0114943	0.00797313	0.414497	Unbiased
chr3:103094054	ENSSSCG00000008496:EIF2AK2	-	chr2:37327613	EIF2AK2	-	0.0940767	0.0404722	-0.0536045	0.000509136	Unbiased
chr3:107303437	-	-	chr2:32539024	YIPF4	-	0.235714	0.16	-0.0757143	0.602698	Unbiased
chr3:107303721	-	-	chr2:32538696	YIPF4	-	0.142857	0.222222	0.0793651	0.704198	Unbiased
chr4:98233961	ENSSSCG00000006643:ANXA9	-	chr1:150966013	ANXA9	-	0.0285714	0.0327869	0.00421546	1	Unbiased
chr4:99438884	ENSSSCG00000006687:ITGA10	-	chr1:145542755	ITGA10	-	0	0.0736842	0.0736842	0.594796	Unbiased
chr5:14850499	ENSSSCG00000000175:ADCY6	ENSSSCG00000000175:ENSSSCT00000000184:K77R	chr12:49176985	ADCY6	ADCY6:ENST00000307885.4:exon1:c.A233G:p.K78R,ADCY6:ENST00000357869.3:exon1:c.A233G:p.K78R,ADCY6:ENST00000550422.1:exon2:c.A233G:p.K78R	0.0227273	0.0769231	0.0541958	0.287934	Unbiased
chr5:14969754	ENSSSCG00000000180:FKBP11	-	chr12:49325703	AC073610.5,RP11-302B13.5	-	0.037037	0.428571	0.391534	0.000261596	Human biased
chr5:18379985	ENSSSCG00000000259:CSAD	-	chr12:53552020	CSAD	-	0.0454545	0.0141844	-0.0312701	0.354593	Unbiased
chr5:21561120	ENSSSCG00000000382:SMARCC2,ENSSSCG00000039795:MYL6	-	chr12:56554025	MYL6	-	0.746667	0.2	-0.546667	0.0223953	Unbiased
chr5:22019073	ENSSSCG00000000406:PTGES3	-	chr12:57078805	PTGES3	-	0.0789474	0.470588	0.391641	0.00186305	Human biased
chr5:22746003	ENSSSCG00000000437:ARHGAP9,ENSSSCG00000000443:GLI1	ENSSSCG00000000443:ENSSSCT00000000478:R701G;ENSSSCG00000000443:ENSSSCT00000056806:R701G;ENSSSCG00000000443:ENSSSCT00000059480:R701G	chr12:57864624	GLI1	GLI1:ENST00000543426.1:exon10:c.A1717G:p.R573G,GLI1:ENST00000546141.1:exon11:c.A1978G:p.R660G,GLI1:ENST00000228682.2:exon12:c.A2101G:p.R701G	0.214286	0.866667	0.652381	5.99137e-05	Human biased
chr5:33537466	ENSSSCG00000038031:CPSF6	-	chr12:69648967	CPSF6	-	0.142857	0.2	0.0571429	0.548062	Unbiased
chr5:33540610	ENSSSCG00000038031:CPSF6	ENSSSCG00000038031:ENSSSCT00000039379:R202G;ENSSSCG00000038031:ENSSSCT00000041371:R150G;ENSSSCG00000038031:ENSSSCT00000053818:R202G;ENSSSCG00000038031:ENSSSCT00000055283:R202G;ENSSSCG00000038031:ENSSSCT00000064622:R202G	chr12:69651595	CPSF6	CPSF6:ENST00000266679.8:exon5:c.A604G:p.R202G,CPSF6:ENST00000435070.2:exon5:c.A604G:p.R202G	0.079374	0.0153846	-0.0639893	0.0570821	Unbiased
chr6:48621010	-	-	chr19:40825172	C19orf47	-	0.6	0.490566	-0.109434	0.742612	Unbiased
chr6:57592937	ENSSSCG00000037023:ENSSSCG00000037023	-	chr19:53640395	ZNF347	-	0.5	0.0714286	-0.428571	0.00802329	Pig biased
chr6:62312475	ENSSSCG00000003987:ZSCAN4,ENSSSCG00000029696:ENSSSCG00000029696	-	chr19:58356527	ZNF587B	-	0.0833333	0.176471	0.0931373	0.622079	Unbiased
chr6:79106337	ENSSSCG00000003512:EIF4G3	-	chr1:21219204	EIF4G3	EIF4G3:ENST00000537738.1:exon4:c.A463G:p.R155G	0.343284	0.111111	-0.232172	0.00391328	Pig biased
chr6:82167307	ENSSSCG00000003543:NIPAL3	-	chr1:24800808	NIPAL3,RCAN3	-	0.0983607	0.116279	0.0179184	0.779318	Unbiased
chr6:82167339	ENSSSCG00000003543:NIPAL3	-	chr1:24800839	NIPAL3,RCAN3	-	0.316384	0.0425532	-0.273831	2.97296e-08	Pig biased
chr6:82167852	ENSSSCG00000003543:NIPAL3	-	chr1:24801424	NIPAL3,RCAN3	-	0.0775862	0.174359	0.0967728	0.00099083	Unbiased
chr6:82167935	ENSSSCG00000003543:NIPAL3	-	chr1:24801493	NIPAL3,RCAN3	-	0.0224215	0.15493	0.132508	0.000128649	Unbiased
chr6:83553567	ENSSSCG00000030660:PDIK1L	-	chr1:26451293	PDIK1L	-	0.0307692	0.0402299	0.00946065	0.763463	Unbiased
chr6:88785866	ENSSSCG00000003613:HDAC1	-	chr1:32799883	MARCKSL1	-	0.00170758	0.000936956	-0.000770621	0.290366	Unbiased
chr6:88785868	ENSSSCG00000003613:HDAC1	-	chr1:32799885	MARCKSL1	-	0.00245979	0.00192269	-0.000537104	0.4909	Unbiased
chr6:88786031	ENSSSCG00000003613:HDAC1	-	chr1:32800048	MARCKSL1	-	0.00247287	0.00161316	-0.000859704	0.238391	Unbiased
chr6:88786033	ENSSSCG00000003613:HDAC1	-	chr1:32800050	MARCKSL1	-	0.00189548	0.000644662	-0.00125082	0.0374581	Unbiased
chr6:88786036	ENSSSCG00000003613:HDAC1	-	chr1:32800053	MARCKSL1	-	0.00077912	0.00111709	0.000337972	0.626572	Unbiased
chr6:108995339	ENSSSCG00000003711:CABYR	-	chr18:21739183	CABYR	-	0.0344828	0.617647	0.583164	6.30136e-07	Human biased
chr6:108995417	ENSSSCG00000003711:CABYR	-	chr18:21739263	CABYR	-	0.478261	0.981132	0.502871	2.33732e-09	Human biased
chr6:121087956	ENSSSCG00000003748:CELF4	-	chr18:34845917	CELF4	-	0.0530303	0.2	0.14697	0.263226	Unbiased
chr7:29996245	ENSSSCG00000001520:LEMD2	ENSSSCG00000001520:ENSSSCT00000001693:S242G;ENSSSCG00000001520:ENSSSCT00000050286:S242G;ENSSSCG00000001520:ENSSSCT00000065334:S242G	chr6:33756242	LEMD2	LEMD2:ENST00000293760.5:exon1:c.A652G:p.S218G	0.00757576	0.0736842	0.0661085	0.0102373	Unbiased
chr7:30267188	ENSSSCG00000001523:GRM4	ENSSSCG00000001523:ENSSSCT00000001696:Q124R	chr6:34100903	GRM4	GRM4:ENST00000374181.4:exon1:c.A371G:p.Q124R,GRM4:ENST00000538487.2:exon2:c.A371G:p.Q124R	0.0813953	0.155556	0.0741602	0.236558	Unbiased
chr7:37862310	ENSSSCG00000001646:BICRAL	-	chr6:42758123	GLTSCR1L	-	0.0287356	0.229167	0.200431	3.25034e-05	Human biased
chr7:39162176	ENSSSCG00000001697:TMEM63B	ENSSSCG00000001697:ENSSSCT00000001896:Q619R;ENSSSCG00000001697:ENSSSCT00000036360:Q522R;ENSSSCG00000001697:ENSSSCT00000038739:Q619R;ENSSSCG00000001697:ENSSSCT00000039005:Q606R	chr6:44120349	TMEM63B	TMEM63B:ENST00000259746.9:exon20:c.A1856G:p.Q619R,TMEM63B:ENST00000323267.6:exon20:c.A1856G:p.Q619R	0.132029	0.138827	0.00679809	0.751127	Unbiased
chr7:75765251	ENSSSCG00000002023:PABPN1,ENSSSCG00000028190:HOMEZ	-	chr14:23781563	BCL2L2-PABPN1	-	0.0740741	0.230769	0.156695	0.00907833	Unbiased
chr7:97362434	ENSSSCG00000002357:ALDH6A1	-	chr14:74526236	AC005484.5	-	0.0102041	0.0158395	0.00563541	0.58811	Unbiased
chr7:116479794	ENSSSCG00000002494:CLMN	-	chr14:95659656	CLMN	CLMN:ENST00000556441.1:exon3:c.A39G:p.K13K	0.310345	0.264368	-0.045977	0.637767	Unbiased
chr7:121664538	-	-	chr14:101301087	RP11-123M6.2	-	0.0720721	0.0265762	-0.0454959	0.0116143	Unbiased
chr7:121681246	-	-	chr14:101317570	RP11-123M6.2	-	0.494845	0.0875524	-0.407293	3.72614e-24	Pig biased
chr7:121684628	-	-	chr14:101320975	RP11-123M6.2	-	0.0542169	0.986274	0.932057	0	Human biased
chr8:1691779	ENSSSCG00000008692:ADD1	-	chr4:2903665	ADD1	-	0.0434783	0.2	0.156522	0.271068	Unbiased
chr8:46206332	ENSSSCG00000024685:GRIA2	ENSSSCG00000024685:ENSSSCT00000022356:Q607R;ENSSSCG00000024685:ENSSSCT00000039120:Q607R;ENSSSCG00000024685:ENSSSCT00000066201:Q607R	chr4:158257875	GRIA2	GRIA2:ENST00000449365.1:exon10:c.A1679G:p.Q560R,GRIA2:ENST00000264426.9:exon11:c.A1820G:p.Q607R,GRIA2:ENST00000296526.7:exon11:c.A1820G:p.Q607R,GRIA2:ENST00000393815.2:exon11:c.A1679G:p.Q560R,GRIA2:ENST00000507898.1:exon11:c.A1679G:p.Q560R	0.995792	0.937419	-0.0583731	3.54145e-13	Unbiased
chr8:46206336	ENSSSCG00000024685:GRIA2	ENSSSCG00000024685:ENSSSCT00000022356:Q608Q;ENSSSCG00000024685:ENSSSCT00000039120:Q608Q;ENSSSCG00000024685:ENSSSCT00000066201:Q608Q	chr4:158257879	GRIA2	GRIA2:ENST00000449365.1:exon10:c.A1683G:p.Q561Q,GRIA2:ENST00000264426.9:exon11:c.A1824G:p.Q608Q,GRIA2:ENST00000296526.7:exon11:c.A1824G:p.Q608Q,GRIA2:ENST00000393815.2:exon11:c.A1683G:p.Q561Q,GRIA2:ENST00000507898.1:exon11:c.A1683G:p.Q561Q	0.13783	0.141723	0.00389275	0.844188	Unbiased
chr8:46206392	ENSSSCG00000024685:GRIA2	-	chr4:158257935	GRIA2	-	0.695279	0.3125	-0.382779	4.45331e-05	Pig biased
chr8:46206586	ENSSSCG00000024685:GRIA2	-	chr4:158258136	GRIA2	-	0.0410959	0.333333	0.292237	0.00117493	Human biased
chr8:46206693	ENSSSCG00000024685:GRIA2	-	chr4:158258243	GRIA2	-	0.0775862	0.6	0.522414	0.00495833	Human biased
chr8:46235227	ENSSSCG00000024685:GRIA2	ENSSSCG00000024685:ENSSSCT00000022356:R764G;ENSSSCG00000024685:ENSSSCT00000039120:R764G;ENSSSCG00000024685:ENSSSCT00000066201:R764G	chr4:158281294	GRIA2	GRIA2:ENST00000449365.1:exon12:c.A2149G:p.R717G,GRIA2:ENST00000264426.9:exon13:c.A2290G:p.R764G,GRIA2:ENST00000296526.7:exon13:c.A2290G:p.R764G,GRIA2:ENST00000393815.2:exon13:c.A2149G:p.R717G,GRIA2:ENST00000507898.1:exon13:c.A2149G:p.R717G	0.733723	0.415561	-0.318162	5.51318e-78	Pig biased
chr8:46236457	ENSSSCG00000024685:GRIA2	-	chr4:158282538	GRIA2	-	0.0544218	0.099359	0.0449372	0.149999	Unbiased
chr8:46236607	ENSSSCG00000024685:GRIA2	-	chr4:158282688	GRIA2	-	0.0322581	0.0357143	0.00345622	1	Unbiased
chr8:56357499	ENSSSCG00000008913:IGFBP7	ENSSSCG00000008913:ENSSSCT00000009759:K95R;ENSSSCG00000008913:ENSSSCT00000040094:K95R;ENSSSCG00000008913:ENSSSCT00000047181:K73R	chr4:57976234	IGFBP7	IGFBP7:ENST00000295666.4:exon1:c.A284G:p.K95R,IGFBP7:ENST00000537922.1:exon1:c.A284G:p.K95R	0.809963	0.438378	-0.371586	3.02898e-62	Pig biased
chr8:56357551	ENSSSCG00000008913:IGFBP7	ENSSSCG00000008913:ENSSSCT00000009759:R78G;ENSSSCG00000008913:ENSSSCT00000040094:R78G	chr4:57976286	IGFBP7	IGFBP7:ENST00000295666.4:exon1:c.A232G:p.R78G,IGFBP7:ENST00000537922.1:exon1:c.A232G:p.R78G	0.370968	0.0498242	-0.321144	2.42276e-24	Pig biased
chr9:3243396	-	-	chr11:6513413	TIMM10B	-	0.1	0.0862069	-0.0137931	1	Unbiased
chr9:3243397	-	-	chr11:6513412	TIMM10B	-	0.2	0.04	-0.16	0.139403	Unbiased
chr9:7241856	ENSSSCG00000014817:ARAP1	-	chr11:72400408	ARAP1-AS1	-	0.106667	0.350962	0.244295	4.36013e-05	Human biased
chr9:17298135	ENSSSCG00000014901:PCF11	-	chr11:82868441	PCF11	-	0.241071	0.198732	-0.0423399	0.233906	Unbiased
chr9:35752568	ENSSSCG00000030565:GRIA4	ENSSSCG00000030565:ENSSSCT00000027751:R765G;ENSSSCG00000030565:ENSSSCT00000037154:R765G;ENSSSCG00000030565:ENSSSCT00000042517:R765G;ENSSSCG00000030565:ENSSSCT00000054101:R765G;ENSSSCG00000030565:ENSSSCT00000058908:R765G	chr11:105804694	GRIA4	GRIA4:ENST00000525187.1:exon13:c.A2293G:p.R765G,GRIA4:ENST00000530497.1:exon13:c.A2293G:p.R765G,GRIA4:ENST00000282499.5:exon14:c.A2293G:p.R765G,GRIA4:ENST00000393127.2:exon14:c.A2293G:p.R765G	0.725581	0.530281	-0.195301	3.46739e-07	Unbiased
chr9:35753179	ENSSSCG00000030565:GRIA4	-	chr11:105805312	GRIA4	-	0.714286	0.6	-0.114286	0.627262	Unbiased
chr9:46026507	ENSSSCG00000015097:DDX6	-	chr11:118619352	AP002954.4	-	0.143396	0.0414996	-0.101897	4.99178e-25	Unbiased
chr9:46824458	ENSSSCG00000015125:NECTIN1	-	chr11:119532688	PVRL1	-	0.115493	0.17924	0.0637473	0.00323782	Unbiased
chr9:67110260	ENSSSCG00000015645:ENSSSCG00000015645	-	chr1:206630935	SRGAP2	-	0	0.59375	0.59375	1.04637e-12	Human biased
chrX:10430512	ENSSSCG00000012126:ENSSSCG00000012126	-	chrX:13790128	GPM6B	-	0.0458522	0.0449326	-0.000919635	0.807105	Unbiased
chrX:57465689	ENSSSCG00000027115:ENSSSCG00000027115	-	chrX:70684858	TAF1	-	0.150538	0.425197	0.274659	1.45677e-05	Human biased
chrX:82773909	ENSSSCG00000012490:TMEM35A	-	chrX:100350295	TMEM35	-	0.0180328	0.0030303	-0.0150025	0.00997338	Unbiased
chrX:91661699	ENSSSCG00000012586:ALG13,ENSSSCG00000034394:ENSSSCG00000034394	-	chrX:110948159	ALG13	-	0.0680473	1	0.931953	2.55796e-06	Human biased
chrX:94053730	ENSSSCG00000012593:HTR2C	-	chrX:113818832	HTR2C	-	0.254902	0.471751	0.216849	8.45202e-09	Human biased
chrX:94259444	ENSSSCG00000012593:HTR2C	ENSSSCG00000012593:ENSSSCT00000035084:I156V	chrX:114082682	HTR2C	HTR2C:ENST00000276198.1:exon5:c.A466G:p.I156V,HTR2C:ENST00000371951.1:exon6:c.A466G:p.I156V	0.62406	0.734177	0.110117	0.0573902	Unbiased
chrX:94259446	ENSSSCG00000012593:HTR2C	ENSSSCG00000012593:ENSSSCT00000035084:I156M	chrX:114082684	HTR2C	HTR2C:ENST00000276198.1:exon5:c.A468G:p.I156M,HTR2C:ENST00000371951.1:exon6:c.A468G:p.I156M	0.346667	0.411168	0.0645008	0.265063	Unbiased
chrX:94259450	ENSSSCG00000012593:HTR2C	ENSSSCG00000012593:ENSSSCT00000035084:N158D	chrX:114082688	HTR2C	HTR2C:ENST00000276198.1:exon5:c.A472G:p.N158D,HTR2C:ENST00000371951.1:exon6:c.A472G:p.N158D	0.0625	0.106918	0.0444182	0.218207	Unbiased
chrX:94259451	ENSSSCG00000012593:HTR2C	ENSSSCG00000012593:ENSSSCT00000035084:N158S	chrX:114082689	HTR2C	HTR2C:ENST00000276198.1:exon5:c.A473G:p.N158S,HTR2C:ENST00000371951.1:exon6:c.A473G:p.N158S	0.524823	0.415584	-0.109238	0.062966	Unbiased
chrX:94259456	ENSSSCG00000012593:HTR2C	ENSSSCG00000012593:ENSSSCT00000035084:I160V	chrX:114082694	HTR2C	HTR2C:ENST00000276198.1:exon5:c.A478G:p.I160V,HTR2C:ENST00000371951.1:exon6:c.A478G:p.I160V	0.554795	0.402439	-0.152355	0.00876649	Unbiased
chrX:94311786	ENSSSCG00000012593:HTR2C	-	chrX:114143037	HTR2C	-	0.03125	0.0496454	0.0183954	0.372645	Unbiased
chrX:98254423	-	-	chrX:119055943	RP3-327A19.5	-	0.138889	0.2	0.0611111	0.540867	Unbiased
chrX:101083849	ENSSSCG00000012638:GRIA3	ENSSSCG00000012638:ENSSSCT00000013819:R775G;ENSSSCG00000012638:ENSSSCT00000032933:R775G;ENSSSCG00000012638:ENSSSCT00000036560:R775G	chrX:122598962	GRIA3	GRIA3:ENST00000264357.5:exon13:c.A2323G:p.R775G,GRIA3:ENST00000371251.1:exon13:c.A2323G:p.R775G,GRIA3:ENST00000371256.5:exon13:c.A2323G:p.R775G,GRIA3:ENST00000542149.1:exon13:c.A2323G:p.R775G	0.893204	0.74898	-0.144224	9.70586e-06	Unbiased
chrX:101083885	ENSSSCG00000012638:GRIA3	-	chrX:122598998	AL356213.1	-	0.3	0.666667	0.366667	0.0396744	Unbiased
chrX:123475359	ENSSSCG00000025708:GABRA3	ENSSSCG00000025708:ENSSSCT00000024798:I342M;ENSSSCG00000025708:ENSSSCT00000040116:I342M;ENSSSCG00000025708:ENSSSCT00000055760:I291M	chrX:151358319	GABRA3	GABRA3:ENST00000370314.4:exon9:c.A1026G:p.I342M,GABRA3:ENST00000535043.1:exon9:c.A1026G:p.I342M	0.936194	0.844771	-0.0914224	1.03496e-08	Unbiased
chrX:124912200	ENSSSCG00000033299:ENSSSCG00000033299	-	chrX:153579736	FLNA	-	0.454545	0.0333333	-0.421212	0.000166122	Pig biased

## Sheet: Table S3e
Table S3e. List of conserved editing sites in Cerebellum
Coordinate in Pig Genome	Pig Gene	Amino Acid Change in Pig	Coordinate in Human Genome	Human Gene	Amino Acid Change in Human	Editing level in Pig	Editing level in Human	Delta editing level	P value	Type
chr1:13788789	ENSSSCG00000004081:ENSSSCG00000004081	-	chr6:152871677	SYNE1	-	0.134752	0.692308	0.557556	2.81464e-05	Human biased
chr1:49419160	ENSSSCG00000004270:ADGRB3	-	chr6:69882978	BAI3	-	0.307692	0.457045	0.149352	0.0147455	Unbiased
chr1:66463993	ENSSSCG00000038757:ENSSSCG00000038757	-	chr6:99980058	TSTD3	-	0.133803	0.413793	0.27999	0.00104569	Human biased
chr1:68530727	ENSSSCG00000004361:GRIK2	ENSSSCG00000004361:ENSSSCT00000004819:I518V;ENSSSCG00000004361:ENSSSCT00000032833:I518V	chr6:102337689	GRIK2	GRIK2:ENST00000318991.6:exon11:c.A1699G:p.I567V,GRIK2:ENST00000369134.4:exon11:c.A1552G:p.I518V,GRIK2:ENST00000369138.1:exon11:c.A1699G:p.I567V,GRIK2:ENST00000413795.1:exon11:c.A1699G:p.I567V,GRIK2:ENST00000421544.1:exon11:c.A1699G:p.I567V	0.404304	0.363125	-0.0411782	0.0414643	Unbiased
chr1:68530740	ENSSSCG00000004361:GRIK2	ENSSSCG00000004361:ENSSSCT00000004819:Y522C;ENSSSCG00000004361:ENSSSCT00000032833:Y522C	chr6:102337702	GRIK2	GRIK2:ENST00000318991.6:exon11:c.A1712G:p.Y571C,GRIK2:ENST00000369134.4:exon11:c.A1565G:p.Y522C,GRIK2:ENST00000369138.1:exon11:c.A1712G:p.Y571C,GRIK2:ENST00000413795.1:exon11:c.A1712G:p.Y571C,GRIK2:ENST00000421544.1:exon11:c.A1712G:p.Y571C	0.789873	0.786	-0.00387342	0.871994	Unbiased
chr1:68540764	ENSSSCG00000004361:GRIK2	-	chr6:102347627	GRIK2	-	0.0101695	0.0307692	0.0205997	0.183924	Unbiased
chr1:68564368	ENSSSCG00000004361:GRIK2	ENSSSCG00000004361:ENSSSCT00000004819:G566G;ENSSSCG00000004361:ENSSSCT00000032833:G566G	chr6:102372572	GRIK2	GRIK2:ENST00000318991.6:exon12:c.A1845G:p.G615G,GRIK2:ENST00000369134.4:exon12:c.A1698G:p.G566G,GRIK2:ENST00000369138.1:exon12:c.A1845G:p.G615G,GRIK2:ENST00000413795.1:exon12:c.A1845G:p.G615G,GRIK2:ENST00000421544.1:exon12:c.A1845G:p.G615G	0.136905	0.0400225	-0.0968822	4.21775e-25	Unbiased
chr1:68564385	ENSSSCG00000004361:GRIK2	ENSSSCG00000004361:ENSSSCT00000004819:Q572R;ENSSSCG00000004361:ENSSSCT00000032833:Q572R	chr6:102372589	GRIK2	GRIK2:ENST00000318991.6:exon12:c.A1862G:p.Q621R,GRIK2:ENST00000369134.4:exon12:c.A1715G:p.Q572R,GRIK2:ENST00000369138.1:exon12:c.A1862G:p.Q621R,GRIK2:ENST00000413795.1:exon12:c.A1862G:p.Q621R,GRIK2:ENST00000421544.1:exon12:c.A1862G:p.Q621R	0.888449	0.884769	-0.0036801	0.759147	Unbiased
chr1:68564426	ENSSSCG00000004361:GRIK2	-	chr6:102372630	GRIK2	-	0.30219	0.121134	-0.181056	1.3585e-17	Unbiased
chr1:68564478	ENSSSCG00000004361:GRIK2	-	chr6:102372682	GRIK2	-	0.01125	0.0363636	0.0251136	0.00485487	Unbiased
chr1:68564727	ENSSSCG00000004361:GRIK2	-	chr6:102372931	GRIK2	-	0.379085	0.0521739	-0.326911	6.02288e-16	Pig biased
chr1:68566288	ENSSSCG00000004361:GRIK2	-	chr6:102374553	GRIK2	-	0.0544994	0.0561609	0.00166157	0.920367	Unbiased
chr1:68566294	ENSSSCG00000004361:GRIK2	-	chr6:102374559	GRIK2	-	0.0537791	0.162452	0.108673	1.72047e-13	Unbiased
chr1:68566307	ENSSSCG00000004361:GRIK2	-	chr6:102374572	GRIK2	-	0.0955556	0.391854	0.296298	1.35542e-36	Human biased
chr1:68566337	ENSSSCG00000004361:GRIK2	-	chr6:102374602	GRIK2	-	0.0133333	0.0687831	0.0554497	6.2657e-05	Unbiased
chr1:68566351	ENSSSCG00000004361:GRIK2	-	chr6:102374616	GRIK2	-	0.475294	0.394667	-0.0806275	0.00309405	Unbiased
chr1:68566369	ENSSSCG00000004361:GRIK2	-	chr6:102374634	GRIK2	-	0.21267	0.344093	0.131423	8.44076e-08	Unbiased
chr1:68566378	ENSSSCG00000004361:GRIK2	-	chr6:102374643	GRIK2	-	0.940919	0.974616	0.0336969	0.000908233	Unbiased
chr1:73574441	ENSSSCG00000004379:SOBP	-	chr6:107835158	SOBP	-	0.015625	0.16	0.144375	0.0207848	Unbiased
chr1:74653121	ENSSSCG00000004387:FOXO3	-	chr6:108905960	FOXO3	-	0.170213	0.828571	0.658359	1.95036e-09	Human biased
chr1:74653136	ENSSSCG00000004387:FOXO3	-	chr6:108905976	FOXO3	-	0.382353	0.592593	0.21024	0.126401	Unbiased
chr1:74653143	ENSSSCG00000004387:FOXO3	-	chr6:108905983	FOXO3	-	0.2	1	0.8	1.58885e-09	Human biased
chr1:74653158	ENSSSCG00000004387:FOXO3	-	chr6:108905998	FOXO3	-	0.826923	1	0.173077	0.581759	Unbiased
chr1:74653172	ENSSSCG00000004387:FOXO3	-	chr6:108906012	FOXO3	-	0.392157	0.222222	-0.169935	0.464041	Unbiased
chr1:74653998	ENSSSCG00000004387:FOXO3	-	chr6:108906934	FOXO3	-	0.138686	0.142857	0.00417101	1	Unbiased
chr1:74653999	ENSSSCG00000004387:FOXO3	-	chr6:108906935	FOXO3	-	0.295775	0.866667	0.570892	2.38322e-05	Human biased
chr1:74654020	ENSSSCG00000004387:FOXO3	-	chr6:108906959	FOXO3	-	0.269939	0.5	0.230061	0.0556358	Unbiased
chr1:74654042	ENSSSCG00000004387:FOXO3	-	chr6:108906981	FOXO3	-	0.174194	0.592593	0.418399	1.5037e-05	Human biased
chr1:98356728	ENSSSCG00000004506:CTIF	-	chr18:46286834	CTIF	-	0.0925926	0.0841889	-0.00840368	0.849104	Unbiased
chr1:100141127	ENSSSCG00000004520:MAPK4	-	chr18:48122249	MAPK4	-	0.375	0.583333	0.208333	0.211847	Unbiased
chr1:100142055	ENSSSCG00000004520:MAPK4	-	chr18:48123102	MAPK4	-	0.0909091	0.2	0.109091	0.398896	Unbiased
chr1:100142056	ENSSSCG00000004520:MAPK4	-	chr18:48123103	MAPK4	-	0.0517241	0.3	0.248276	0.023782	Unbiased
chr1:100142057	ENSSSCG00000004520:MAPK4	-	chr18:48123104	MAPK4	-	0.176	0.4	0.224	0.229449	Unbiased
chr1:100142081	ENSSSCG00000004520:MAPK4	-	chr18:48123131	MAPK4	-	0.57732	0.2	-0.37732	0.167924	Unbiased
chr1:100142104	ENSSSCG00000004520:MAPK4	-	chr18:48123154	MAPK4	-	0.106952	0.166667	0.0597148	0.503841	Unbiased
chr1:100142289	ENSSSCG00000004520:MAPK4	-	chr18:48123334	MAPK4	-	0.824034	0.2	-0.624034	0.00491428	Pig biased
chr1:100142293	ENSSSCG00000004520:MAPK4	-	chr18:48123338	MAPK4	-	0.0609756	0.272727	0.211752	0.0335177	Unbiased
chr1:108472682	ENSSSCG00000028737:USP3	-	chr15:63838938	USP3-AS1	-	0.14	0.5	0.36	0.00396756	Human biased
chr1:108472784	ENSSSCG00000028737:USP3	-	chr15:63838818	USP3-AS1	-	0.305085	0.172414	-0.132671	0.208488	Unbiased
chr1:111085485	-	-	chr15:61167370	RORA	-	0.356164	0.571429	0.215264	0.415535	Unbiased
chr1:121248284	ENSSSCG00000004636:TRPM7	-	chr15:50854874	TRPM7	-	0.11215	0.2	0.0878505	0.466857	Unbiased
chr1:141889445	ENSSSCG00000004832:UBE3A	-	chr15:25681878	UBE3A	-	0.0125523	0.52381	0.511257	1.54549e-11	Human biased
chr1:141889456	ENSSSCG00000004832:UBE3A	-	chr15:25681867	UBE3A	-	0.012931	0.5	0.487069	2.6381e-07	Human biased
chr1:163170088	ENSSSCG00000004926:PDCD7	ENSSSCG00000004926:ENSSSCT00000005436:Q43R	chr15:65425992	PDCD7	PDCD7:ENST00000204549.4:exon1:c.A128G:p.Q43R	0.0534351	0.228311	0.174875	9.32456e-06	Unbiased
chr1:163170163	ENSSSCG00000004926:PDCD7	ENSSSCG00000004926:ENSSSCT00000005436:Q18R	chr15:65426067	PDCD7	PDCD7:ENST00000204549.4:exon1:c.A53G:p.Q18R	0.2	0.164286	-0.0357143	0.348333	Unbiased
chr1:163787007	ENSSSCG00000004938:DENND4A	-	chr15:66080975	DENND4A	-	0.0752688	0.125	0.0497312	0.496073	Unbiased
chr1:179543327	ENSSSCG00000032489:KLHDC1	-	chr14:50167719	KLHDC1	-	0.0117647	0.375	0.363235	0.00165426	Human biased
chr1:179543356	ENSSSCG00000032489:KLHDC1	-	chr14:50167749	KLHDC1	-	0.06	0.571429	0.511429	0.00123317	Human biased
chr1:184403853	ENSSSCG00000005054:MAPK1IP1L	-	chr14:55520956	MAPK1IP1L	-	0.724138	0.282051	-0.442087	2.52001e-05	Pig biased
chr1:184403889	ENSSSCG00000005054:MAPK1IP1L	-	chr14:55520998	MAPK1IP1L	-	0.509091	0.142857	-0.366234	0.109045	Unbiased
chr1:184403914	ENSSSCG00000005054:MAPK1IP1L	-	chr14:55521017	MAPK1IP1L	-	0.403509	0.25	-0.153509	0.513609	Unbiased
chr1:184403974	ENSSSCG00000005054:MAPK1IP1L	-	chr14:55521095	MAPK1IP1L	-	0.358974	0.166667	-0.192308	0.29609	Unbiased
chr1:188583167	-	-	chr14:59932691	GPR135	-	0.08	0.222222	0.142222	0.20457	Unbiased
chr1:250195288	ENSSSCG00000038824:FRRS1L	-	chr9:111900885	FRRS1L	-	0.214286	0.0660377	-0.148248	0.0930212	Unbiased
chr1:250208861	ENSSSCG00000038824:FRRS1L	-	chr9:111918176	FRRS1L	-	0.131944	0.372549	0.240605	0.000403955	Human biased
chr1:265999826	ENSSSCG00000005602:GAPVD1	-	chr9:128098325	GAPVD1	-	0.25	0.0769231	-0.173077	0.256752	Unbiased
chr1:267983305	ENSSSCG00000005613:LRSAM1	-	chr9:130236664	LRSAM1	-	0.078125	0.315789	0.237664	0.015006	Unbiased
chr1:268764115	ENSSSCG00000005646:COQ4	-	chr9:131092597	COQ4	-	0.254902	0.438017	0.183115	0.00499361	Unbiased
chr1:268764160	ENSSSCG00000005646:COQ4	-	chr9:131092632	COQ4	-	0.253521	0.0714286	-0.182093	0.00144567	Unbiased
chr1:270167845	-	-	chr9:132794717	FNBP1	-	0.07	0.235294	0.165294	0.0535784	Unbiased
chr10:14916902	ENSSSCG00000010862:CDC42BPA	-	chr1:227481293	CDC42BPA	-	0.292537	0.2	-0.0925373	1	Unbiased
chr10:43909247	ENSSSCG00000038007:HACD1	-	chr10:17637873	PTPLA	-	0.2	0.346154	0.146154	0.245938	Unbiased
chr11:522090	ENSSSCG00000009569:PSPC1	-	chr13:20293573	PSPC1	-	0.298077	0.162791	-0.135286	0.100877	Unbiased
chr11:15707091	ENSSSCG00000035658:ENSSSCG00000035658	-	chr13:52992678	VPS36	-	0.0895522	0.857143	0.767591	5.72032e-11	Human biased
chr11:15707108	ENSSSCG00000035658:ENSSSCG00000035658	-	chr13:52992690	VPS36	-	0.015873	0.307692	0.291819	0.00250784	Human biased
chr11:39379500	ENSSSCG00000038842:PCDH9	-	chr13:67727366	PCDH9	-	0.131148	0.25	0.118852	0.298377	Unbiased
chr11:39379514	ENSSSCG00000038842:PCDH9	-	chr13:67727377	PCDH9	-	0.183486	0.428571	0.245085	0.129899	Unbiased
chr11:39379523	ENSSSCG00000038842:PCDH9	-	chr13:67727386	PCDH9	-	0.035	0.75	0.715	5.10649e-12	Human biased
chr12:14007762	ENSSSCG00000017274:PITPNC1	-	chr17:65679832	PITPNC1	-	0.0191388	0.4	0.380861	0.00633583	Human biased
chr12:18814182	ENSSSCG00000017357:ITGA2B	-	chr17:42521261	GPATCH8	-	0.0846561	0.168	0.0833439	0.0315204	Unbiased
chr12:18814260	ENSSSCG00000017357:ITGA2B	-	chr17:42521195	GPATCH8	-	0.0750853	0.0806452	0.00555984	0.796622	Unbiased
chr12:18814274	ENSSSCG00000017357:ITGA2B	-	chr17:42521181	GPATCH8	-	0.470588	0.0588235	-0.411765	0.000648749	Pig biased
chr12:24199758	ENSSSCG00000032782:PNPO	-	chr17:46025034	RP11-6N17.6,RP11-6N17.9	-	0.564417	0.0606061	-0.503811	1.11146e-13	Pig biased
chr12:24199880	ENSSSCG00000032782:PNPO	-	chr17:46025242	RP11-6N17.6,RP11-6N17.9	-	0.0333333	0.0282132	-0.00512017	0.775104	Unbiased
chr12:26547530	ENSSSCG00000039259:ENSSSCG00000039259	-	chr17:66138018	LRRC37A16P	-	0.125	0.354167	0.229167	0.116822	Unbiased
chr12:34246815	ENSSSCG00000017623:VEZF1	-	chr17:56049824	CUEDC1,VEZF1	-	0.688406	0.0963855	-0.59202	1.27548e-52	Pig biased
chr12:34246816	ENSSSCG00000017623:VEZF1	-	chr17:56049825	CUEDC1,VEZF1	-	0.144	0.0332871	-0.110713	5.59896e-06	Unbiased
chr12:34246820	ENSSSCG00000017623:VEZF1	-	chr17:56049829	CUEDC1,VEZF1	-	0.00694444	0.101523	0.0945784	1.51988e-05	Unbiased
chr12:35076320	ENSSSCG00000038932:PPM1E	-	chr17:56856786	PPM1E	-	0	0.482759	0.482759	0.006639	Human biased
chr12:39052489	ENSSSCG00000026596:SYNRG	-	chr17:35954786	SYNRG	-	0.2	0.8	0.6	0.0889111	Unbiased
chr12:44410166	ENSSSCG00000017756:NLK	-	chr17:26375487	NLK	-	0.0909091	0.416667	0.325758	0.0124674	Unbiased
chr12:44410168	ENSSSCG00000017756:NLK	-	chr17:26375489	NLK	-	0.113208	0.166667	0.0534591	0.548166	Unbiased
chr12:44855233	-	-	chr17:26936879	SPAG5-AS1	-	0.460674	0.765873	0.305199	2.67914e-07	Human biased
chr12:44855248	-	-	chr17:26936898	SPAG5-AS1	-	0.517007	0.856574	0.339567	4.856e-13	Human biased
chr12:44977479	ENSSSCG00000032658:TRAF4	-	chr17:27072836	AC010761.9	-	0	0.308943	0.308943	0.0618643	Unbiased
chr12:45168485	ENSSSCG00000017779:PHF12	-	chr17:27271634	RP11-20B24.5	-	0.02	0.684211	0.664211	8.84994e-09	Human biased
chr12:46240469	ENSSSCG00000017795:NSRP1	-	chr17:28473482	NSRP1	-	0.272727	0.166667	-0.106061	1	Unbiased
chr12:47266152	ENSSSCG00000017812:VPS53	-	chr17:438101	RP5-1029F21.4	-	0.3	0.2	-0.1	1	Unbiased
chr12:48139371	ENSSSCG00000039780:RTN4RL1	-	chr17:1924372	CTD-2545H1.1	-	0.0535714	0.2	0.146429	0.296184	Unbiased
chr12:53126165	ENSSSCG00000021363:CHD3	-	chr17:7772599	LSMD1	-	0.166667	0.259843	0.0931759	0.736255	Unbiased
chr13:2639980	ENSSSCG00000011190:METTL6	-	chr3:15454240	METTL6	-	0	0.384615	0.384615	6.83744e-11	Human biased
chr13:10699658	ENSSSCG00000024296:NKIRAS1	-	chr3:23941577	NKIRAS1	-	0.153846	0.368421	0.214575	0.249088	Unbiased
chr13:21762047	ENSSSCG00000027738:LRRFIP2	-	chr3:37126157	LRRFIP2	-	0.0895522	0.2	0.110448	0.409651	Unbiased
chr13:31390358	ENSSSCG00000040922:IP6K2	-	chr3:48736133	IP6K2	-	0.0888889	0.2	0.111111	0.351486	Unbiased
chr13:32317120	ENSSSCG00000011390:IP6K1	-	chr3:49818562	IP6K1	-	0.283582	1	0.716418	0.00303783	Human biased
chr13:32317141	ENSSSCG00000011390:IP6K1	-	chr3:49818580	IP6K1	-	0.0338983	1	0.966102	3.38988e-07	Human biased
chr13:35881911	ENSSSCG00000011455:CACNA1D	-	chr3:53817038	CACNA1D	-	0.29927	0.421053	0.121783	0.173802	Unbiased
chr13:35884880	ENSSSCG00000011455:CACNA1D	ENSSSCG00000011455:ENSSSCT00000012536:I1660M	chr3:53820892	CACNA1D	CACNA1D:ENST00000540742.1:exon14:c.A1512G:p.I504M,CACNA1D:ENST00000422281.2:exon39:c.A4791G:p.I1597M,CACNA1D:ENST00000350061.5:exon40:c.A4836G:p.I1612M,CACNA1D:ENST00000288139.4:exon41:c.A4896G:p.I1632M	0.231959	0.340136	0.108177	0.00674354	Unbiased
chr13:39922407	ENSSSCG00000011471:FLNB	ENSSSCG00000011471:ENSSSCT00000012553:Q2243R;ENSSSCG00000011471:ENSSSCT00000040435:Q2327R;ENSSSCG00000011471:ENSSSCT00000044709:Q2303R;ENSSSCG00000011471:ENSSSCT00000064169:Q2296R	chr3:58141801	FLNB	FLNB:ENST00000493452.1:exon39:c.A6308G:p.Q2103R,FLNB:ENST00000348383.5:exon40:c.A6764G:p.Q2255R,FLNB:ENST00000358537.3:exon40:c.A6815G:p.Q2272R,FLNB:ENST00000419752.2:exon40:c.A6347G:p.Q2116R,FLNB:ENST00000295956.4:exon41:c.A6887G:p.Q2296R,FLNB:ENST00000429972.2:exon41:c.A6854G:p.Q2285R,FLNB:ENST00000490882.1:exon42:c.A6980G:p.Q2327R	0.608405	0.310507	-0.297898	1.30868e-57	Pig biased
chr13:39924081	ENSSSCG00000011471:FLNB	-	chr3:58143316	FLNB	-	0.818182	0.988764	0.170582	0.0312925	Unbiased
chr13:40073087	ENSSSCG00000035452:HTD2	-	chr3:58304162	RPP14	-	0.0176991	0.2	0.182301	0.12281	Unbiased
chr13:40073139	ENSSSCG00000035452:HTD2	-	chr3:58304278	RPP14	-	0.0338983	0.138122	0.104223	1.43683e-05	Unbiased
chr13:40073242	ENSSSCG00000035452:HTD2	-	chr3:58304471	RPP14	-	0.0561798	0.0676157	0.0114359	0.809452	Unbiased
chr13:44008173	ENSSSCG00000011489:CADPS	-	chr3:62413208	CADPS	-	0.0891089	0.181818	0.0927093	0.275948	Unbiased
chr13:44008174	ENSSSCG00000011489:CADPS	-	chr3:62413209	CADPS	-	0.287129	0.0833333	-0.203795	0.186219	Unbiased
chr13:44008194	ENSSSCG00000011489:CADPS	-	chr3:62413223	CADPS	-	0.122549	0.78125	0.658701	7.06062e-23	Human biased
chr13:44010385	ENSSSCG00000011489:CADPS	-	chr3:62414576	CADPS	-	0.50495	0.134615	-0.370335	7.38744e-06	Pig biased
chr13:44018551	ENSSSCG00000011489:CADPS	-	chr3:62422395	CADPS	-	0.00898204	0.35	0.341018	6.46265e-08	Human biased
chr13:44018577	ENSSSCG00000011489:CADPS	-	chr3:62422421	CADPS	-	0.0701754	0.296296	0.226121	0.00129383	Human biased
chr13:44020000	ENSSSCG00000011489:CADPS	ENSSSCG00000011489:ENSSSCT00000012572:E1267G;ENSSSCG00000011489:ENSSSCT00000044538:E1242G;ENSSSCG00000011489:ENSSSCT00000066159:E1251G	chr3:62423807	CADPS	CADPS:ENST00000357948.3:exon25:c.A3512G:p.E1171G,CADPS:ENST00000283269.9:exon26:c.A3632G:p.E1211G,CADPS:ENST00000383710.4:exon28:c.A3749G:p.E1250G	0.175966	0.233886	0.0579202	0.000902338	Unbiased
chr13:44087221	ENSSSCG00000011489:CADPS	-	chr3:62487073	CADPS	-	0.0206612	0.142857	0.122196	0.158745	Unbiased
chr13:44087315	ENSSSCG00000011489:CADPS	-	chr3:62487166	CADPS	-	0.0333333	0.4	0.366667	0.000715686	Human biased
chr13:44087784	ENSSSCG00000011489:CADPS	-	chr3:62487627	CADPS	-	0	0.133333	0.133333	0.0324074	Unbiased
chr13:44481409	ENSSSCG00000011489:CADPS	ENSSSCG00000011489:ENSSSCT00000012572:S92G;ENSSSCG00000011489:ENSSSCT00000044538:S92G;ENSSSCG00000011489:ENSSSCT00000066159:S92G	chr3:62860434	CADPS	CADPS:ENST00000283269.9:exon1:c.A271G:p.S91G,CADPS:ENST00000357948.3:exon1:c.A271G:p.S91G,CADPS:ENST00000383710.4:exon1:c.A271G:p.S91G,CADPS:ENST00000490353.2:exon1:c.A271G:p.S91G	0.181132	0.0833333	-0.0977987	0.69899	Unbiased
chr13:52968684	ENSSSCG00000027675:ENSSSCG00000027675	-	chr3:71627355	FOXP1	-	0.1	0.421053	0.321053	0.107147	Unbiased
chr13:53081395	-	-	chr3:71729589	EIF4E3	-	0.371429	0.174603	-0.196825	0.000361263	Unbiased
chr13:69433108	ENSSSCG00000036643:ENSSSCG00000036643	-	chr3:15113852	ZFYVE20	-	0	0.0539216	0.0539216	3.73934e-07	Unbiased
chr13:76120614	ENSSSCG00000024492:EPHB1	-	chr3:134731813	EPHB1	-	0.492308	0.272727	-0.21958	0.0862141	Unbiased
chr13:79024901	ENSSSCG00000036610:ENSSSCG00000036610	-	chr3:137949237	ARMC8	-	0.1	0.2	0.1	1	Unbiased
chr13:80224932	ENSSSCG00000011662:COPB2,ENSSSCG00000035771:MRPS22	-	chr3:139072534	MRPS22	-	0.342466	0.230769	-0.111697	0.533049	Unbiased
chr13:80224944	ENSSSCG00000011662:COPB2,ENSSSCG00000035771:MRPS22	-	chr3:139072545	MRPS22	-	0.129032	0.166667	0.0376344	1	Unbiased
chr13:80226718	ENSSSCG00000011662:COPB2,ENSSSCG00000035771:MRPS22	-	chr3:139074203	MRPS22	-	0.391667	0.0155039	-0.376163	1.1585e-35	Pig biased
chr13:80226719	ENSSSCG00000011662:COPB2,ENSSSCG00000035771:MRPS22	-	chr3:139074204	MRPS22	-	0.0629921	0.0213608	-0.0416314	0.0109766	Unbiased
chr13:80226720	ENSSSCG00000011662:COPB2,ENSSSCG00000035771:MRPS22	-	chr3:139074205	MRPS22	-	0.00787402	0.0444732	0.0365992	0.0411108	Unbiased
chr13:112289709	-	-	chr3:173565612	NLGN1	-	0.140244	0.142857	0.00261324	1	Unbiased
chr13:117427237	ENSSSCG00000039285:MFN1	-	chr3:179090559	MFN1	-	0.127072	0.291188	0.164116	4.29006e-05	Unbiased
chr13:117429056	ENSSSCG00000039285:MFN1	ENSSSCG00000039285:ENSSSCT00000039446:I328V	chr3:179093014	MFN1	MFN1:ENST00000263969.5:exon9:c.A982G:p.I328V,MFN1:ENST00000280653.7:exon10:c.A982G:p.I328V,MFN1:ENST00000471841.1:exon10:c.A982G:p.I328V	0.126362	0.228086	0.101724	2.87422e-06	Unbiased
chr13:132317633	ENSSSCG00000031147:ACAP2	-	chr3:195045436	ACAP2	-	0.0522876	0.2	0.147712	0.257062	Unbiased
chr13:145404213	ENSSSCG00000026113:ZBTB20	-	chr3:114304867	ZBTB20	-	0.0792683	0.1	0.0207317	0.577828	Unbiased
chr13:192928491	ENSSSCG00000025119:GRIK1	ENSSSCG00000025119:ENSSSCT00000028121:Q636R;ENSSSCG00000025119:ENSSSCT00000045911:Q621R;ENSSSCG00000025119:ENSSSCT00000055117:Q621R;ENSSSCG00000025119:ENSSSCT00000055366:Q621R	chr21:30953750	GRIK1	GRIK1:ENST00000389125.3:exon12:c.A1862G:p.Q621R,GRIK1:ENST00000399909.1:exon12:c.A1862G:p.Q621R,GRIK1:ENST00000399914.1:exon12:c.A1862G:p.Q621R,GRIK1:ENST00000327783.4:exon13:c.A1907G:p.Q636R,GRIK1:ENST00000389124.2:exon13:c.A1907G:p.Q636R,GRIK1:ENST00000399907.1:exon13:c.A1907G:p.Q636R,GRIK1:ENST00000399913.1:exon13:c.A1907G:p.Q636R,GRIK1:ENST00000309434.7:exon14:c.A1913G:p.Q638R,GRIK1:ENST00000…	0.217391	0.335484	0.118093	0.0568928	Unbiased
chr13:197168371	ENSSSCG00000023674:SON	ENSSSCG00000023674:ENSSSCT00000026483:T274A;ENSSSCG00000023674:ENSSSCT00000060699:T413A;ENSSSCG00000023674:ENSSSCT00000063351:T413A;ENSSSCG00000023674:ENSSSCT00000065483:T413A	chr21:34922801	SON	SON:ENST00000290239.6:exon3:c.A1264G:p.T422A,SON:ENST00000300278.4:exon3:c.A1264G:p.T422A,SON:ENST00000356577.4:exon3:c.A1264G:p.T422A,SON:ENST00000381679.4:exon3:c.A1264G:p.T422A	0.0514286	0.173333	0.121905	3.30488e-19	Unbiased
chr13:197168826	ENSSSCG00000023674:SON	ENSSSCG00000023674:ENSSSCT00000026483:P425P;ENSSSCG00000023674:ENSSSCT00000060699:P564P;ENSSSCG00000023674:ENSSSCT00000063351:P564P;ENSSSCG00000023674:ENSSSCT00000065483:P564P	chr21:34923256	SON	SON:ENST00000290239.6:exon3:c.A1719G:p.P573P,SON:ENST00000300278.4:exon3:c.A1719G:p.P573P,SON:ENST00000356577.4:exon3:c.A1719G:p.P573P,SON:ENST00000381679.4:exon3:c.A1719G:p.P573P	0.109937	0.0965732	-0.0133634	0.484863	Unbiased
chr13:197168845	ENSSSCG00000023674:SON	ENSSSCG00000023674:ENSSSCT00000026483:R432G;ENSSSCG00000023674:ENSSSCT00000060699:R571G;ENSSSCG00000023674:ENSSSCT00000063351:R571G;ENSSSCG00000023674:ENSSSCT00000065483:R571G	chr21:34923275	SON	SON:ENST00000290239.6:exon3:c.A1738G:p.R580G,SON:ENST00000300278.4:exon3:c.A1738G:p.R580G,SON:ENST00000356577.4:exon3:c.A1738G:p.R580G,SON:ENST00000381679.4:exon3:c.A1738G:p.R580G	0.485714	0.40225	-0.0834639	0.00187327	Unbiased
chr13:197174856	ENSSSCG00000023674:SON	-	chr21:34929694	SON	-	0.130435	0.125	-0.00543478	1	Unbiased
chr13:207748876	ENSSSCG00000012089:ADARB1	-	chr21:46593702	ADARB1	-	0.316092	0.111111	-0.204981	0.279407	Unbiased
chr13:207748884	ENSSSCG00000012089:ADARB1	-	chr21:46593710	ADARB1	-	0.804348	0.142857	-0.661491	0.000454779	Pig biased
chr13:207750347	ENSSSCG00000012089:ADARB1	-	chr21:46595607	ADARB1	-	0.59322	0.130435	-0.462786	5.28382e-05	Pig biased
chr13:207750360	ENSSSCG00000012089:ADARB1	-	chr21:46595620	ADARB1	-	0.0229008	0.210526	0.187626	0.000335427	Unbiased
chr13:207750361	ENSSSCG00000012089:ADARB1	-	chr21:46595621	ADARB1	-	0.40458	0.156863	-0.247717	0.00151601	Pig biased
chr14:12235648	ENSSSCG00000009678:FBXO16	-	chr8:28300769	FBXO16	-	0.208333	0.3	0.0916667	0.666405	Unbiased
chr14:12237904	ENSSSCG00000009678:FBXO16	-	chr8:28304389	FBXO16	-	0.0714286	0.461538	0.39011	0.00989579	Human biased
chr14:14087712	ENSSSCG00000009693:XKR6	ENSSSCG00000009693:ENSSSCT00000010628:R296G;ENSSSCG00000009693:ENSSSCT00000041874:R385G;ENSSSCG00000009693:ENSSSCT00000054615:R389G;ENSSSCG00000009693:ENSSSCT00000065812:R382G	chr8:10755755	XKR6	XKR6:ENST00000304437.2:exon3:c.A796G:p.R266G,XKR6:ENST00000416569.2:exon3:c.A1633G:p.R545G	0.658537	0.326733	-0.331804	5.44514e-08	Pig biased
chr14:32759703	ENSSSCG00000009834:ATXN2	-	chr12:112021790	ATXN2	-	0.0152672	0.142857	0.12759	0.145591	Unbiased
chr14:33686552	ENSSSCG00000009845:SRRM4	-	chr12:119565846	SRRM4	-	0.12069	0.109677	-0.0110122	0.810643	Unbiased
chr14:36105128	ENSSSCG00000009864:MED13L	-	chr12:116672275	MED13L	-	0.169312	0.2	0.0306878	1	Unbiased
chr14:36105158	ENSSSCG00000009864:MED13L	-	chr12:116672165	MED13L	-	0.2	0.2	0	1	Unbiased
chr14:36105223	ENSSSCG00000009864:MED13L	-	chr12:116672088	MED13L	-	0.0519481	0.166667	0.114719	0.283535	Unbiased
chr14:36107851	ENSSSCG00000009864:MED13L	-	chr12:116670808	MED13L	-	0.233333	0.181818	-0.0515152	1	Unbiased
chr14:42498855	ENSSSCG00000039261:WSCD2	-	chr12:108634610	WSCD2	-	0.170732	0.0851675	-0.0855642	0.0156506	Unbiased
chr14:42925215	ENSSSCG00000009951:SGSM1	-	chr22:25258507	SGSM1	-	0.230769	0.363636	0.132867	0.659134	Unbiased
chr14:47727496	ENSSSCG00000010015:OSBP2	-	chr22:31292704	OSBP2	-	0.164634	0.394366	0.229732	0.000343082	Human biased
chr14:47727506	ENSSSCG00000010015:OSBP2	-	chr22:31292714	OSBP2	-	0.229508	0.137255	-0.0922533	0.17667	Unbiased
chr14:47727518	ENSSSCG00000010015:OSBP2	-	chr22:31292735	OSBP2	-	0.39899	0.2	-0.19899	0.0154835	Unbiased
chr14:47727536	ENSSSCG00000010015:OSBP2	-	chr22:31292766	OSBP2	-	0.73516	0.769231	0.034071	0.725352	Unbiased
chr14:47727552	ENSSSCG00000010015:OSBP2	-	chr22:31292782	OSBP2	-	0.04	0.2	0.16	0.205419	Unbiased
chr14:49312253	ENSSSCG00000010052:BCR	-	chr22:23649339	BCR	-	0.263158	0.5	0.236842	0.150305	Unbiased
chr14:51473632	ENSSSCG00000010135:DGCR8,ENSSSCG00000029742:ENSSSCG00000029742	-	chr22:20073330	MIR3618	-	0.0853659	0.0789474	-0.00641849	1	Unbiased
chr14:55940197	ENSSSCG00000010156:ARID4B	-	chr1:235471283	ARID4B	-	0.154321	0.37037	0.216049	0.0138359	Unbiased
chr14:56050191	ENSSSCG00000010156:ARID4B	-	chr1:235364360	ARID4B	-	0.308824	0.166667	-0.142157	0.662417	Unbiased
chr14:63769504	ENSSSCG00000010212:ENSSSCG00000010212	-	chr10:62119551	ANK3	-	0.0833333	0.0851064	0.00177305	1	Unbiased
chr14:70289307	ENSSSCG00000010232:LRRTM3,ENSSSCG00000036480:CTNNA3	-	chr10:68806273	CTNNA3,LRRTM3	-	0.0121951	0.142857	0.130662	0.10078	Unbiased
chr14:70289320	ENSSSCG00000010232:LRRTM3,ENSSSCG00000036480:CTNNA3	-	chr10:68806286	CTNNA3,LRRTM3	-	0.016129	0.333333	0.317204	0.0056474	Human biased
chr14:70290288	ENSSSCG00000010232:LRRTM3,ENSSSCG00000036480:CTNNA3	-	chr10:68806829	CTNNA3,LRRTM3	-	0.0235294	0.166667	0.143137	0.186978	Unbiased
chr14:70290357	ENSSSCG00000010232:LRRTM3,ENSSSCG00000036480:CTNNA3	-	chr10:68806905	CTNNA3,LRRTM3	-	0	0.8	0.8	1.57058e-06	Human biased
chr14:70290361	ENSSSCG00000010232:LRRTM3,ENSSSCG00000036480:CTNNA3	-	chr10:68806909	CTNNA3,LRRTM3	-	0.247423	0.2	-0.0474227	1	Unbiased
chr14:71511787	ENSSSCG00000010239:RUFY2	-	chr10:70123127	RUFY2	-	0.240566	0.3	0.059434	0.708487	Unbiased
chr14:71860039	ENSSSCG00000010243:CCAR1	-	chr10:70512378	CCAR1	-	0.0903226	0.3125	0.222177	0.0196061	Unbiased
chr14:75535812	ENSSSCG00000010290:MCU	-	chr10:74474956	MCU	-	0.387097	0.200431	-0.186666	0.00176541	Unbiased
chr14:76260957	ENSSSCG00000010301:PPP3CB	-	chr10:75207299	PPP3CB	-	0.0290698	0.0959596	0.0668898	0.0103985	Unbiased
chr14:76265220	ENSSSCG00000010301:PPP3CB	-	chr10:75211777	PPP3CB	-	0.0147059	0.318182	0.303476	3.12366e-06	Human biased
chr14:80105988	ENSSSCG00000010325:KCNMA1	ENSSSCG00000010325:ENSSSCT00000056413:S11G	chr10:79397298	KCNMA1	KCNMA1:ENST00000286627.5:exon1:c.A103G:p.S35G,KCNMA1:ENST00000286628.8:exon1:c.A103G:p.S35G,KCNMA1:ENST00000354353.5:exon1:c.A103G:p.S35G,KCNMA1:ENST00000372440.1:exon1:c.A103G:p.S35G,KCNMA1:ENST00000372443.1:exon1:c.A103G:p.S35G,KCNMA1:ENST00000404771.3:exon1:c.A103G:p.S35G,KCNMA1:ENST00000404857.1:exon1:c.A103G:p.S35G,KCNMA1:ENST00000406533.3:exon1:c.A103G:p.S35G,KCNMA1:ENST00000480683.1:exon1:…	0.0049505	0.0533175	0.048367	3.94393e-08	Unbiased
chr14:107115951	ENSSSCG00000010494:SORBS1	-	chr10:97297684	SORBS1	-	0.163265	0.25	0.0867347	0.619396	Unbiased
chr14:110540447	ENSSSCG00000010536:CNNM1	ENSSSCG00000010536:ENSSSCT00000011526:S237G;ENSSSCG00000010536:ENSSSCT00000050252:S237G;ENSSSCG00000010536:ENSSSCT00000055954:S237G	chr10:101089862	CNNM1	CNNM1:ENST00000356713.4:exon1:c.A718G:p.S240G,CNNM1:ENST00000370528.3:exon3:c.A505G:p.S169G,CNNM1:ENST00000446890.1:exon3:c.A505G:p.S169G	0.178571	0.166667	-0.0119048	1	Unbiased
chr14:111355216	ENSSSCG00000010550:CWF19L1	-	chr10:101992805	RP11-316M21.6	-	0.0430108	0.103372	0.0603617	0.000956039	Unbiased
chr14:111355286	ENSSSCG00000010550:CWF19L1	-	chr10:101992843	RP11-316M21.6	-	0.00623053	0.0232558	0.0170253	0.0972632	Unbiased
chr14:111355330	ENSSSCG00000010550:CWF19L1	-	chr10:101992867	RP11-316M21.6	-	0.022113	0.0358705	0.0137575	0.195031	Unbiased
chr14:114080348	ENSSSCG00000010594:NT5C2	-	chr10:104865311	NT5C2	-	0.0294118	0.6	0.570588	0.00419448	Human biased
chr14:114080379	ENSSSCG00000010594:NT5C2	-	chr10:104865356	NT5C2	-	0.113636	0.222222	0.108586	0.587841	Unbiased
chr14:121345500	ENSSSCG00000035869:ENSSSCG00000035869	-	chr10:112675656	BBIP1	-	0	0.2	0.2	0.3125	Unbiased
chr14:125059427	ENSSSCG00000010651:ABLIM1	-	chr10:116494085	ABLIM1,RP11-106M7.1	-	0.316406	0.188679	-0.127727	0.0696801	Unbiased
chr14:127499273	ENSSSCG00000010669:ENSSSCG00000010669	-	chr10:119131449	PDZD8	-	0.115385	1	0.884615	9.26956e-05	Human biased
chr14:134302814	ENSSSCG00000010738:ZRANB1	-	chr10:126650937	ZRANB1	-	0.166667	0.288136	0.121469	0.171364	Unbiased
chr15:38296382	ENSSSCG00000023328:GPM6A	-	chr4:176611622	GPM6A	-	0.0857143	0.236842	0.151128	0.0415961	Unbiased
chr15:38296525	ENSSSCG00000023328:GPM6A	-	chr4:176611765	GPM6A	-	0.173913	0.230769	0.0568562	0.613369	Unbiased
chr15:48249999	ENSSSCG00000015819:PLPP5	-	chr8:38122542	PPAPDC1B	-	0.1	0.135065	0.0350649	1	Unbiased
chr15:59572102	ENSSSCG00000015861:WDR33	-	chr2:128518847	WDR33	-	0.0551378	0.210526	0.155388	0.0240855	Unbiased
chr15:59572114	ENSSSCG00000015861:WDR33	-	chr2:128518835	WDR33	-	0.0917226	0.421053	0.32933	0.000262701	Human biased
chr15:66664910	ENSSSCG00000015882:BAZ2B,ENSSSCG00000015883:MARCH7	-	chr2:160586659	2020-03-07	-	0.122093	0.230769	0.108676	0.381869	Unbiased
chr15:74947904	ENSSSCG00000032715:CERS6	-	chr2:169332465	CERS6	-	0.164062	0.375	0.210938	0.147911	Unbiased
chr15:95565190	ENSSSCG00000016056:GLS	-	chr2:191799592	GLS	-	0.00931677	0.0678571	0.0585404	1.86647e-05	Unbiased
chr15:104737163	ENSSSCG00000036339:FAM126B	-	chr2:201926072	FAM126B	-	0.15	0.8	0.65	0.00396165	Human biased
chr15:104737164	ENSSSCG00000036339:FAM126B	-	chr2:201926073	FAM126B	-	0.0714286	0.2	0.128571	0.342643	Unbiased
chr15:105394292	ENSSSCG00000016109:ALS2	-	chr2:202639940	ALS2	-	0.142857	0.315789	0.172932	0.0905267	Unbiased
chr15:105394293	ENSSSCG00000016109:ALS2	-	chr2:202639941	ALS2	-	0.161074	0.533333	0.37226	3.93276e-05	Human biased
chr15:105397128	ENSSSCG00000016109:ALS2	-	chr2:202641833	ALS2	-	0.177419	0.305085	0.127665	0.0431872	Unbiased
chr15:105397136	ENSSSCG00000016109:ALS2	-	chr2:202641841	ALS2	-	0.235294	0.297872	0.0625782	0.431404	Unbiased
chr15:105397150	ENSSSCG00000016109:ALS2	-	chr2:202641857	ALS2	-	0.324503	0.166667	-0.157837	0.665221	Unbiased
chr15:106950641	ENSSSCG00000016119:ENSSSCG00000016119	-	chr2:204349153	RAPH1	-	0.0196078	0.4	0.380392	0.018759	Unbiased
chr15:106951975	ENSSSCG00000016119:ENSSSCG00000016119	-	chr2:204350561	RAPH1	-	0.0131579	0.2	0.186842	0.12037	Unbiased
chr15:106952006	ENSSSCG00000016119:ENSSSCG00000016119	-	chr2:204350591	RAPH1	-	0.025641	0.9	0.874359	9.40698e-10	Human biased
chr15:110910482	ENSSSCG00000024696:ENSSSCG00000024696	-	chr2:208620129	CCNYL1	-	0.0666667	0.148148	0.0814815	0.335977	Unbiased
chr15:110910487	ENSSSCG00000024696:ENSSSCG00000024696	-	chr2:208620134	CCNYL1	-	0.0434783	0.2	0.156522	0.271068	Unbiased
chr15:112686617	ENSSSCG00000016153:UNC80	-	chr2:210835066	UNC80	-	0.0438596	0.211823	0.167963	3.00945e-05	Unbiased
chr15:112687180	ENSSSCG00000016153:UNC80	ENSSSCG00000016153:ENSSSCT00000017586:S2662G;ENSSSCG00000016153:ENSSSCT00000030483:S2730G	chr2:210835613	UNC80	UNC80:ENST00000539183.1:exon4:c.A328G:p.S110G,UNC80:ENST00000272845.6:exon53:c.A7975G:p.S2659G,UNC80:ENST00000439458.1:exon53:c.A7990G:p.S2664G	0.298103	0.0927022	-0.205401	1.6636e-33	Pig biased
chr15:112687550	ENSSSCG00000016153:UNC80	-	chr2:210835985	UNC80	-	0.120354	0.16129	0.0409363	0.310456	Unbiased
chr15:118296733	ENSSSCG00000022758:PECR	-	chr2:216903561	PECR	-	0.133333	0.213235	0.079902	0.0888224	Unbiased
chr15:118296837	ENSSSCG00000022758:PECR	-	chr2:216903629	PECR	-	0.020202	0.121951	0.101749	0.0228458	Unbiased
chr16:4244227	ENSSSCG00000016784:ANKH	-	chr5:14847030	ANKH	-	0.0175439	0.2	0.182456	0.103644	Unbiased
chr16:4244228	ENSSSCG00000016784:ANKH	-	chr5:14847031	ANKH	-	0.0501931	0.2	0.149807	0.240114	Unbiased
chr16:24140877	ENSSSCG00000016853:RICTOR,ENSSSCG00000016855:FYB1	ENSSSCG00000016853:ENSSSCT00000018353:R1391G;ENSSSCG00000016853:ENSSSCT00000040125:R1239G;ENSSSCG00000016853:ENSSSCT00000056502:R1448G;ENSSSCG00000016853:ENSSSCT00000064221:R1391G	chr5:38949495	RICTOR	RICTOR:ENST00000296782.5:exon32:c.A4171G:p.R1391G	0.043956	0.443262	0.399306	8.38963e-24	Human biased
chr16:24141065	ENSSSCG00000016853:RICTOR,ENSSSCG00000016855:FYB1	-	chr5:38949678	RICTOR	-	0.0454545	0.493333	0.447879	5.8117e-13	Human biased
chr17:11555419	ENSSSCG00000031857:SMIM19	-	chr8:42400730	SMIM19	-	0.478261	0.274194	-0.204067	0.0423235	Unbiased
chr17:13980394	ENSSSCG00000026466:SLC23A2	-	chr20:4950345	SLC23A2	-	0.25	0.8	0.55	0.0403162	Unbiased
chr17:18157879	ENSSSCG00000007058:PLCB4	-	chr20:9249055	PLCB4	-	0.463415	0.4	-0.0634146	1	Unbiased
chr17:26374997	ENSSSCG00000007088:ENSSSCG00000007088,ENSSSCG00000018309:ENSSSCG00000018309	-	chr20:17943427	SNORD17	-	0.0601827	0.0534562	-0.00672648	0.374285	Unbiased
chr17:35263308	ENSSSCG00000007228:HM13	-	chr20:30126775	HM13	-	0.659794	0.241935	-0.417858	3.14147e-07	Pig biased
chr17:35263355	ENSSSCG00000007228:HM13	-	chr20:30126822	HM13	-	0.258427	0.2	-0.058427	0.75625	Unbiased
chr17:35402756	ENSSSCG00000035357:BCL2L1	-	chr20:30296931	RP11-243J16.7	-	0.0689655	0.16	0.0910345	0.398714	Unbiased
chr17:39475632	ENSSSCG00000007314:ENSSSCG00000007314	-	chr20:34803141	EPB41L1	-	0.0648649	0.181818	0.116953	0.0738968	Unbiased
chr17:40062710	ENSSSCG00000007324:SOGA1	-	chr20:35450005	SOGA1	-	0.0743243	0.439024	0.3647	2.33371e-07	Human biased
chr17:40625064	ENSSSCG00000037248:ENSSSCG00000037248	-	chr20:36147533	BLCAP	BLCAP:ENST00000373537.2:exon2:c.A44G:p.K15R,BLCAP:ENST00000397131.1:exon2:c.A44G:p.K15R,BLCAP:ENST00000397134.1:exon2:c.A44G:p.K15R,BLCAP:ENST00000397135.1:exon2:c.A44G:p.K15R,BLCAP:ENST00000397137.1:exon2:c.A44G:p.K15R,BLCAP:ENST00000414542.2:exon3:c.A44G:p.K15R	0.226011	0.0632588	-0.162752	1.8163e-49	Unbiased
chr17:40625094	ENSSSCG00000037248:ENSSSCG00000037248	-	chr20:36147563	BLCAP	BLCAP:ENST00000373537.2:exon2:c.A14G:p.Q5R,BLCAP:ENST00000397131.1:exon2:c.A14G:p.Q5R,BLCAP:ENST00000397134.1:exon2:c.A14G:p.Q5R,BLCAP:ENST00000397135.1:exon2:c.A14G:p.Q5R,BLCAP:ENST00000397137.1:exon2:c.A14G:p.Q5R,BLCAP:ENST00000414542.2:exon3:c.A14G:p.Q5R	0.265388	0.127398	-0.13799	8.60569e-36	Unbiased
chr17:40625103	ENSSSCG00000037248:ENSSSCG00000037248	-	chr20:36147572	BLCAP	BLCAP:ENST00000373537.2:exon2:c.A5G:p.Y2C,BLCAP:ENST00000397131.1:exon2:c.A5G:p.Y2C,BLCAP:ENST00000397134.1:exon2:c.A5G:p.Y2C,BLCAP:ENST00000397135.1:exon2:c.A5G:p.Y2C,BLCAP:ENST00000397137.1:exon2:c.A5G:p.Y2C,BLCAP:ENST00000414542.2:exon3:c.A5G:p.Y2C	0.379098	0.197065	-0.182033	1.39844e-43	Unbiased
chr17:40625112	ENSSSCG00000037248:ENSSSCG00000037248	-	chr20:36147581	BLCAP	-	0.00784519	0.008	0.000154812	1	Unbiased
chr17:40625114	ENSSSCG00000037248:ENSSSCG00000037248	-	chr20:36147583	BLCAP	-	0.0256534	0.0153752	-0.0102783	0.0374093	Unbiased
chr17:40625575	ENSSSCG00000037248:ENSSSCG00000037248	-	chr20:36148080	BLCAP	-	0.607143	0.601626	-0.00551684	1	Unbiased
chr17:40625638	ENSSSCG00000037248:ENSSSCG00000037248	-	chr20:36148143	BLCAP	-	0.568182	0.30303	-0.265152	0.00486139	Pig biased
chr17:48340028	ENSSSCG00000007439:CDH22,ENSSSCG00000007452:TP53RK	-	chr20:44802727	CDH22	-	0.235556	0.0157395	-0.219816	5.69724e-42	Pig biased
chr17:48340029	ENSSSCG00000007439:CDH22,ENSSSCG00000007452:TP53RK	-	chr20:44802728	CDH22	-	0.651408	0.160234	-0.491175	9.79904e-74	Pig biased
chr17:52962911	ENSSSCG00000007478:ATP9A	-	chr20:50246145	ATP9A	-	1	0.961538	-0.0384615	1	Unbiased
chr18:6145761	ENSSSCG00000021475:SLC4A2,ENSSSCG00000024184:FASTK	-	chr7:150777387	FASTK	-	0.0697674	0.245925	0.176157	5.15983e-05	Unbiased
chr18:19121574	ENSSSCG00000016566:NRF1	-	chr7:129272287	NRF1	-	0.057971	0.0797101	0.0217391	0.635543	Unbiased
chr18:19121888	ENSSSCG00000016566:NRF1	-	chr7:129272054	NRF1	-	0.0150376	0.844086	0.829048	1.61823e-57	Human biased
chr2:42362620	ENSSSCG00000039254:ENSSSCG00000039254,ENSSSCG00000040570:C11orf58	-	chr11:16762169	C11orf58	-	0.3	0.285714	-0.0142857	1	Unbiased
chr2:65772087	ENSSSCG00000013754:CACNA1A	-	chr19:13415258	CACNA1A	-	0.12069	0.536842	0.416152	1.32895e-17	Human biased
chr2:65772113	ENSSSCG00000013754:CACNA1A	-	chr19:13415225	CACNA1A	-	0.335664	0.122881	-0.212783	1.3759e-06	Pig biased
chr2:122812166	-	-	chr5:118175068	DTWD2	-	0.153846	0.125	-0.0288462	1	Unbiased
chr2:133721599	ENSSSCG00000014267:ENSSSCG00000014267	-	chr5:130772497	CTC-432M15.3,RAPGEF6	-	0.375	0.833333	0.458333	0.00790729	Human biased
chr2:133722794	ENSSSCG00000014267:ENSSSCG00000014267	-	chr5:130773416	CTC-432M15.3,RAPGEF6	-	0.0263158	0.111111	0.0847953	0.349676	Unbiased
chr2:139428749	-	-	chr5:136740202	SPOCK1	-	0.0661157	0.2	0.133884	0.313947	Unbiased
chr2:139496951	-	-	chr5:136811482	SPOCK1	-	0.0547945	0.0769231	0.0221286	0.545529	Unbiased
chr2:141789912	ENSSSCG00000021082:NRG2	-	chr5:139383534	NRG2	-	0.340909	0.294118	-0.0467914	0.807423	Unbiased
chr2:141789927	ENSSSCG00000021082:NRG2	-	chr5:139383549	NRG2	-	0.130435	0.242424	0.111989	0.495659	Unbiased
chr2:143128189	ENSSSCG00000027371:PCDHGC4,ENSSSCG00000032137:PCDHGA9	-	chr5:140860206	PCDHGA1,PCDHGA10,PCDHGA11,PCDHGA12,PCDHGA2,PCDHGA3,PCDHGA4,PCDHGA5,PCDHGA6,PCDHGA7,PCDHGA8,PCDHGA9,PCDHGB1,PCDHGB2,PCDHGB3,PCDHGB4,PCDHGB6,PCDHGB7,PCDHGC3	-	0.00952381	0.176471	0.166947	0.00839995	Unbiased
chr2:150825983	ENSSSCG00000014437:PPARGC1B	-	chr5:149112500	PPARGC1B	-	0.425743	0.305556	-0.120187	0.237268	Unbiased
chr3:35515598	-	-	chr16:7181302	RBFOX1	-	0.106918	0.166667	0.0597484	0.505634	Unbiased
chr3:35515603	-	-	chr16:7181297	RBFOX1	-	0.0952381	0.166667	0.0714286	0.46549	Unbiased
chr3:35839076	-	-	chr16:6814863	RP11-420N3.2	-	0.0725806	0.241379	0.168799	0.0144926	Unbiased
chr3:38213202	ENSSSCG00000007950:ADCY9	-	chr16:4113505	ADCY9	-	0.0322581	0.583333	0.551075	2.1754e-09	Human biased
chr3:80504353	ENSSSCG00000008382:USP34	-	chr2:61504414	USP34	-	0.0461538	0.125	0.0788462	0.377966	Unbiased
chr3:87350343	ENSSSCG00000008413:GPR75	-	chr2:54076334	MIR3682	-	0.101124	0.167203	0.066079	0.0330127	Unbiased
chr3:101294857	ENSSSCG00000008478:SOS1	-	chr2:39271410	SOS1	-	0.0590717	0.153846	0.0947744	0.198129	Unbiased
chr3:103089870	ENSSSCG00000008496:EIF2AK2	-	chr2:37331706	EIF2AK2	-	0.0952381	0.166667	0.0714286	0.336106	Unbiased
chr3:103092104	ENSSSCG00000008496:EIF2AK2	-	chr2:37329350	EIF2AK2	-	0.338983	0.0555556	-0.283427	0.0142907	Unbiased
chr3:103093488	ENSSSCG00000008496:EIF2AK2	-	chr2:37328075	EIF2AK2	-	0.0755814	0.796183	0.720602	1.09685e-140	Human biased
chr3:103093534	ENSSSCG00000008496:EIF2AK2	-	chr2:37328029	EIF2AK2	-	0.0491803	0.059322	0.0101417	0.637382	Unbiased
chr3:103093549	ENSSSCG00000008496:EIF2AK2	-	chr2:37328014	EIF2AK2	-	0.0299003	0.0306122	0.000711913	1	Unbiased
chr3:103093559	ENSSSCG00000008496:EIF2AK2	-	chr2:37328000	EIF2AK2	-	0.0121581	0.0210526	0.00889458	0.61996	Unbiased
chr3:103094017	ENSSSCG00000008496:EIF2AK2	-	chr2:37327650	EIF2AK2	-	0.060241	0.0361905	-0.0240505	0.185475	Unbiased
chr3:103094019	ENSSSCG00000008496:EIF2AK2	-	chr2:37327648	EIF2AK2	-	0.0235294	0.152597	0.129068	2.35668e-07	Unbiased
chr3:103094025	ENSSSCG00000008496:EIF2AK2	-	chr2:37327642	EIF2AK2	-	0.0218579	0.06	0.0381421	0.0753045	Unbiased
chr3:103094026	ENSSSCG00000008496:EIF2AK2	-	chr2:37327641	EIF2AK2	-	0.0239521	0.0252101	0.00125799	1	Unbiased
chr3:103094054	ENSSSCG00000008496:EIF2AK2	-	chr2:37327613	EIF2AK2	-	0.0411765	0.025974	-0.0152024	0.408259	Unbiased
chr3:107303437	-	-	chr2:32539024	YIPF4	-	0.177083	0.0732759	-0.103807	0.00145893	Unbiased
chr3:107303721	-	-	chr2:32538696	YIPF4	-	0.0769231	0.0909091	0.013986	1	Unbiased
chr3:112118691	ENSSSCG00000029185:MAPRE3	-	chr2:27208666	AC013472.3,AC013472.4	-	0.115044	0.153846	0.0388019	0.653533	Unbiased
chr4:35791315	-	-	chr8:102196350	ZNF706	-	0.26087	0.545455	0.284585	0.137736	Unbiased
chr4:35791442	-	-	chr8:102196207	ZNF706	-	0.0869565	0.244898	0.157941	0.200119	Unbiased
chr4:52318100	-	-	chr8:85346530	RALYL	-	0.0414938	0.151515	0.110021	0.023166	Unbiased
chr4:99438884	ENSSSCG00000006687:ITGA10	-	chr1:145542755	ITGA10	-	0.0232558	0.0789474	0.0556916	0.333597	Unbiased
chr5:14850499	ENSSSCG00000000175:ADCY6	ENSSSCG00000000175:ENSSSCT00000000184:K77R	chr12:49176985	ADCY6	ADCY6:ENST00000307885.4:exon1:c.A233G:p.K78R,ADCY6:ENST00000357869.3:exon1:c.A233G:p.K78R,ADCY6:ENST00000550422.1:exon2:c.A233G:p.K78R	0	0.0344828	0.0344828	1	Unbiased
chr5:14969754	ENSSSCG00000000180:FKBP11	-	chr12:49325703	AC073610.5,RP11-302B13.5	-	0.075188	0.229299	0.154111	0.000332733	Unbiased
chr5:16558304	ENSSSCG00000029196:DIP2B	-	chr12:51095185	DIP2B	-	0.262295	0.2	-0.0622951	1	Unbiased
chr5:18379985	ENSSSCG00000000259:CSAD	-	chr12:53552020	CSAD	-	0.0357143	0.0135135	-0.0222008	0.380097	Unbiased
chr5:22684284	ENSSSCG00000026498:ENSSSCG00000026498	-	chr12:57798918	R3HDM2	-	0.176471	0.0909091	-0.0855615	0.634676	Unbiased
chr5:32920183	ENSSSCG00000032595:RAP1B	-	chr12:69016733	RAP1B	-	0.0636364	0.227273	0.163636	0.0292458	Unbiased
chr5:33537466	ENSSSCG00000038031:CPSF6	-	chr12:69648967	CPSF6	-	0.226667	0.52381	0.297143	0.00644106	Human biased
chr5:33537493	ENSSSCG00000038031:CPSF6	-	chr12:69648994	CPSF6	-	0.244131	0.333333	0.0892019	0.429372	Unbiased
chr5:33540610	ENSSSCG00000038031:CPSF6	ENSSSCG00000038031:ENSSSCT00000039379:R202G;ENSSSCG00000038031:ENSSSCT00000041371:R150G;ENSSSCG00000038031:ENSSSCT00000053818:R202G;ENSSSCG00000038031:ENSSSCT00000055283:R202G;ENSSSCG00000038031:ENSSSCT00000064622:R202G	chr12:69651595	CPSF6	CPSF6:ENST00000266679.8:exon5:c.A604G:p.R202G,CPSF6:ENST00000435070.2:exon5:c.A604G:p.R202G	0.0133333	0.0554324	0.042099	2.41709e-06	Unbiased
chr5:42018741	ENSSSCG00000000531:BICD1	-	chr12:32386163	BICD1	-	0.0733333	0.333333	0.26	0.0796541	Unbiased
chr5:79284512	ENSSSCG00000000842:KANSL2,ENSSSCG00000038260:ENSSSCG00000038260	-	chr12:49050253	KANSL2	-	0.00925926	0.272727	0.263468	0.00228568	Human biased
chr5:79562981	ENSSSCG00000027792:C12orf45	-	chr12:105398269	C12orf45,ALDH1L2	-	0	0.142857	0.142857	0.0534351	Unbiased
chr6:44022256	ENSSSCG00000002872:KIAA0355	-	chr19:34834312	KIAA0355	-	0.133333	0.266667	0.133333	0.409953	Unbiased
chr6:45578632	ENSSSCG00000025355:ZNF146	-	chr19:36707279	ZNF146,ZNF565	-	0.186047	0.2	0.0139535	1	Unbiased
chr6:48621010	-	-	chr19:40825172	C19orf47	-	0.511628	0.358974	-0.152654	0.187204	Unbiased
chr6:48648095	ENSSSCG00000025109:PLD3	-	chr19:40858671	PLD3	-	0.0384615	0.0769231	0.0384615	0.411819	Unbiased
chr6:48648131	ENSSSCG00000025109:PLD3	-	chr19:40858699	PLD3	-	0.0332542	0.257143	0.223889	1.24353e-05	Human biased
chr6:48648137	ENSSSCG00000025109:PLD3	-	chr19:40858705	PLD3	-	0.166276	0.321429	0.155152	0.0674399	Unbiased
chr6:48648172	ENSSSCG00000025109:PLD3	-	chr19:40858755	PLD3	-	0.0280172	0.181818	0.153801	0.00510728	Unbiased
chr6:53227807	ENSSSCG00000029567:SLC8A2	-	chr19:47965595	SLC8A2	-	0.0763359	0.517241	0.440906	3.2966e-13	Human biased
chr6:54929425	ENSSSCG00000003192:IL4I1	-	chr19:50418264	CTC-326K19.6,IL4I1,NUP62	-	0.0819672	0.142857	0.0608899	0.608352	Unbiased
chr6:57051574	ENSSSCG00000027741:ENSSSCG00000027741	-	chr19:53717237	CTD-2245F17.3,ZNF677	-	0.025641	0.352941	0.3273	0.00216505	Human biased
chr6:62312475	ENSSSCG00000003987:ZSCAN4,ENSSSCG00000029696:ENSSSCG00000029696	-	chr19:58356527	ZNF587B	-	0	0.257862	0.257862	0.000672938	Human biased
chr6:62355530	ENSSSCG00000037467:ENSSSCG00000037467	-	chr19:58196667	ZNF551	ZNF551:ENST00000282296.5:exon2:c.A119G:p.Q40R,ZNF551:ENST00000356715.4:exon2:c.A71G:p.Q24R,ZNF551:ENST00000596085.1:exon2:c.A71G:p.Q24R	0.0536913	0.0909091	0.0372178	0.251964	Unbiased
chr6:70126340	-	-	chr1:9832518	CLSTN1	-	0.116279	0.214286	0.0980066	0.385857	Unbiased
chr6:70608077	ENSSSCG00000003401:KIF1B	-	chr1:10379259	KIF1B	-	0.19697	0.222222	0.0252525	0.75933	Unbiased
chr6:74153676	-	-	chr1:15165186	KAZN	-	0.0714286	0.386364	0.314935	0.0437827	Unbiased
chr6:74153699	-	-	chr1:15165211	KAZN	-	0.111111	0.571429	0.460317	0.00837444	Human biased
chr6:79106337	ENSSSCG00000003512:EIF4G3	-	chr1:21219204	EIF4G3	EIF4G3:ENST00000537738.1:exon4:c.A463G:p.R155G	0.447761	0.2	-0.247761	0.38663	Unbiased
chr6:82167307	ENSSSCG00000003543:NIPAL3	-	chr1:24800808	NIPAL3,RCAN3	-	0.103448	0.0427136	-0.0607347	0.0472874	Unbiased
chr6:82167339	ENSSSCG00000003543:NIPAL3	-	chr1:24800839	NIPAL3,RCAN3	-	0.290323	0.0277778	-0.262545	2.34685e-12	Pig biased
chr6:82167852	ENSSSCG00000003543:NIPAL3	-	chr1:24801424	NIPAL3,RCAN3	-	0.0381679	0.125592	0.0874245	0.00176466	Unbiased
chr6:82167935	ENSSSCG00000003543:NIPAL3	-	chr1:24801493	NIPAL3,RCAN3	-	0.0105263	0.0788177	0.0682914	0.0108282	Unbiased
chr6:83553567	ENSSSCG00000030660:PDIK1L	-	chr1:26451293	PDIK1L	-	0.00558659	0.125	0.119413	0.0181121	Unbiased
chr6:88687832	ENSSSCG00000022014:DCDC2B	-	chr1:32676553	DCDC2B	-	0.192308	0.818182	0.625874	0.000619764	Human biased
chr6:88687853	ENSSSCG00000022014:DCDC2B	-	chr1:32676574	DCDC2B	-	0.333333	0.5	0.166667	0.65702	Unbiased
chr6:88785866	ENSSSCG00000003613:HDAC1	-	chr1:32799883	MARCKSL1	-	0.00205339	0.00123381	-0.000819582	0.672814	Unbiased
chr6:88785868	ENSSSCG00000003613:HDAC1	-	chr1:32799885	MARCKSL1	-	0.00349243	0.00211416	-0.00137827	0.275153	Unbiased
chr6:88786031	ENSSSCG00000003613:HDAC1	-	chr1:32800048	MARCKSL1	-	0.00438947	0.00250976	-0.00187971	0.255874	Unbiased
chr6:88786033	ENSSSCG00000003613:HDAC1	-	chr1:32800050	MARCKSL1	-	0.00195312	0.00305944	0.00110632	0.565862	Unbiased
chr6:88786036	ENSSSCG00000003613:HDAC1	-	chr1:32800053	MARCKSL1	-	0.00152323	0.00569801	0.00417478	0.150974	Unbiased
chr6:89315114	ENSSSCG00000032067:ENSSSCG00000032067	-	chr1:33498987	AK2	-	0.26087	0.741935	0.481066	0.000785504	Human biased
chr6:89315124	ENSSSCG00000032067:ENSSSCG00000032067	-	chr1:33498998	AK2	-	0.333333	0.352941	0.0196078	1	Unbiased
chr6:103120043	ENSSSCG00000003690:DLGAP1	-	chr18:3613456	DLGAP1	-	0.146067	0.2	0.0539326	0.554153	Unbiased
chr6:115966290	ENSSSCG00000003730:RNF138	-	chr18:29702531	RP11-53I6.4	-	0.0972222	0.444444	0.347222	0.00158755	Human biased
chr6:118683298	ENSSSCG00000028047:DTNA	-	chr18:32405902	DTNA	-	0.0769231	0.774194	0.69727	1.56491e-09	Human biased
chr6:118683319	ENSSSCG00000028047:DTNA	-	chr18:32405923	DTNA	-	0.65625	0.25	-0.40625	0.0491966	Unbiased
chr6:121087956	ENSSSCG00000003748:CELF4	-	chr18:34845917	CELF4	-	0.00977995	0.153846	0.144066	0.0122756	Unbiased
chr7:28915400	ENSSSCG00000001499:DST	-	chr6:56714128	RP11-472M19.2	-	0.246154	0.8	0.553846	0.0168266	Unbiased
chr7:29664530	ENSSSCG00000001507:TAPBP	-	chr6:33269265	TAPBP	-	0.0911854	0.176471	0.0852852	0.128462	Unbiased
chr7:29996245	ENSSSCG00000001520:LEMD2	ENSSSCG00000001520:ENSSSCT00000001693:S242G;ENSSSCG00000001520:ENSSSCT00000050286:S242G;ENSSSCG00000001520:ENSSSCT00000065334:S242G	chr6:33756242	LEMD2	LEMD2:ENST00000293760.5:exon1:c.A652G:p.S218G	0.0434783	0.0829016	0.0394233	0.271524	Unbiased
chr7:30267188	ENSSSCG00000001523:GRM4	ENSSSCG00000001523:ENSSSCT00000001696:Q124R	chr6:34100903	GRM4	GRM4:ENST00000374181.4:exon1:c.A371G:p.Q124R,GRM4:ENST00000538487.2:exon2:c.A371G:p.Q124R	0.0986644	0.175953	0.0772891	5.37274e-21	Unbiased
chr7:33424443	ENSSSCG00000039952:ZFAND3	-	chr6:37820609	ZFAND3	-	0	0.125	0.125	0.2	Unbiased
chr7:37862310	ENSSSCG00000001646:BICRAL	-	chr6:42758123	GLTSCR1L	-	0.0242718	0.189542	0.165271	1.52598e-07	Unbiased
chr7:37888344	ENSSSCG00000001646:BICRAL	-	chr6:42779168	GLTSCR1L	-	0.111111	0.166667	0.0555556	0.541436	Unbiased
chr7:39162176	ENSSSCG00000001697:TMEM63B	ENSSSCG00000001697:ENSSSCT00000001896:Q619R;ENSSSCG00000001697:ENSSSCT00000036360:Q522R;ENSSSCG00000001697:ENSSSCT00000038739:Q619R;ENSSSCG00000001697:ENSSSCT00000039005:Q606R	chr6:44120349	TMEM63B	TMEM63B:ENST00000259746.9:exon20:c.A1856G:p.Q619R,TMEM63B:ENST00000323267.6:exon20:c.A1856G:p.Q619R	0.309582	0.306188	-0.00339426	0.909868	Unbiased
chr7:56627588	ENSSSCG00000001865:SCAPER	-	chr15:76665621	SCAPER	-	0	0.333333	0.333333	0.110294	Unbiased
chr7:75765251	ENSSSCG00000002023:PABPN1,ENSSSCG00000028190:HOMEZ	-	chr14:23781563	BCL2L2-PABPN1	-	0.0114943	0.206897	0.195402	3.16179e-05	Unbiased
chr7:77931274	ENSSSCG00000038947:ENSSSCG00000038947	-	chr14:21725890	HNRNPC	-	0.215569	0.0625	-0.153069	0.200348	Unbiased
chr7:97362434	ENSSSCG00000002357:ALDH6A1	-	chr14:74526236	AC005484.5	-	0.0182927	0.0311475	0.0128549	0.595584	Unbiased
chr7:112318167	ENSSSCG00000002436:TTC7B	-	chr14:91062177	TTC7B	-	0.925	0.0621118	-0.862888	2.90444e-43	Pig biased
chr7:121664538	-	-	chr14:101301087	RP11-123M6.2	-	0.0438596	0.0143156	-0.0295441	0.0021554	Unbiased
chr7:121681246	-	-	chr14:101317570	RP11-123M6.2	-	0.166667	0.0192942	-0.147372	1.54726e-20	Unbiased
chr7:121684628	-	-	chr14:101320975	RP11-123M6.2	-	0.011925	0.664257	0.652332	1.52306e-249	Human biased
chr8:1691779	ENSSSCG00000008692:ADD1	-	chr4:2903665	ADD1	-	0.272727	0.4	0.127273	0.0688868	Unbiased
chr8:30891331	ENSSSCG00000033602:UBE2K	-	chr4:39703481	UBE2K	-	0.132184	0.2	0.0678161	0.517422	Unbiased
chr8:40784496	-	-	chr4:54868234	FIP1L1	-	0.011811	0.204545	0.192734	2.43868e-06	Unbiased
chr8:46206332	ENSSSCG00000024685:GRIA2	ENSSSCG00000024685:ENSSSCT00000022356:Q607R;ENSSSCG00000024685:ENSSSCT00000039120:Q607R;ENSSSCG00000024685:ENSSSCT00000066201:Q607R	chr4:158257875	GRIA2	GRIA2:ENST00000449365.1:exon10:c.A1679G:p.Q560R,GRIA2:ENST00000264426.9:exon11:c.A1820G:p.Q607R,GRIA2:ENST00000296526.7:exon11:c.A1820G:p.Q607R,GRIA2:ENST00000393815.2:exon11:c.A1679G:p.Q560R,GRIA2:ENST00000507898.1:exon11:c.A1679G:p.Q560R	0.996663	0.98606	-0.0106028	0.00602668	Unbiased
chr8:46206336	ENSSSCG00000024685:GRIA2	ENSSSCG00000024685:ENSSSCT00000022356:Q608Q;ENSSSCG00000024685:ENSSSCT00000039120:Q608Q;ENSSSCG00000024685:ENSSSCT00000066201:Q608Q	chr4:158257879	GRIA2	GRIA2:ENST00000449365.1:exon10:c.A1683G:p.Q561Q,GRIA2:ENST00000264426.9:exon11:c.A1824G:p.Q608Q,GRIA2:ENST00000296526.7:exon11:c.A1824G:p.Q608Q,GRIA2:ENST00000393815.2:exon11:c.A1683G:p.Q561Q,GRIA2:ENST00000507898.1:exon11:c.A1683G:p.Q561Q	0.0995025	0.143058	0.0435555	0.00121194	Unbiased
chr8:46206392	ENSSSCG00000024685:GRIA2	-	chr4:158257935	GRIA2	-	0.756757	0.618214	-0.138543	1.63374e-06	Unbiased
chr8:46206586	ENSSSCG00000024685:GRIA2	-	chr4:158258136	GRIA2	-	0.118812	0.891892	0.77308	1.58818e-115	Human biased
chr8:46206587	ENSSSCG00000024685:GRIA2	-	chr4:158258137	GRIA2	-	0.627119	0.832258	0.205139	3.4129e-10	Human biased
chr8:46206588	ENSSSCG00000024685:GRIA2	-	chr4:158258138	GRIA2	-	0.18677	0.415909	0.229139	2.90915e-10	Human biased
chr8:46206693	ENSSSCG00000024685:GRIA2	-	chr4:158258243	GRIA2	-	0.179676	0.25	0.070324	0.00459472	Unbiased
chr8:46235227	ENSSSCG00000024685:GRIA2	ENSSSCG00000024685:ENSSSCT00000022356:R764G;ENSSSCG00000024685:ENSSSCT00000039120:R764G;ENSSSCG00000024685:ENSSSCT00000066201:R764G	chr4:158281294	GRIA2	GRIA2:ENST00000449365.1:exon12:c.A2149G:p.R717G,GRIA2:ENST00000264426.9:exon13:c.A2290G:p.R764G,GRIA2:ENST00000296526.7:exon13:c.A2290G:p.R764G,GRIA2:ENST00000393815.2:exon13:c.A2149G:p.R717G,GRIA2:ENST00000507898.1:exon13:c.A2149G:p.R717G	0.859873	0.755951	-0.103922	4.12441e-15	Unbiased
chr8:46236088	ENSSSCG00000024685:GRIA2	-	chr4:158282160	GRIA2	-	0.00603622	0.012987	0.0069508	0.407735	Unbiased
chr8:46236457	ENSSSCG00000024685:GRIA2	-	chr4:158282538	GRIA2	-	0.00615385	0.0312158	0.0250619	0.00850503	Unbiased
chr8:56357499	ENSSSCG00000008913:IGFBP7	ENSSSCG00000008913:ENSSSCT00000009759:K95R;ENSSSCG00000008913:ENSSSCT00000040094:K95R;ENSSSCG00000008913:ENSSSCT00000047181:K73R	chr4:57976234	IGFBP7	IGFBP7:ENST00000295666.4:exon1:c.A284G:p.K95R,IGFBP7:ENST00000537922.1:exon1:c.A284G:p.K95R	0.933333	0.523995	-0.409339	3.44551e-69	Pig biased
chr8:56357551	ENSSSCG00000008913:IGFBP7	ENSSSCG00000008913:ENSSSCT00000009759:R78G;ENSSSCG00000008913:ENSSSCT00000040094:R78G	chr4:57976286	IGFBP7	IGFBP7:ENST00000295666.4:exon1:c.A232G:p.R78G,IGFBP7:ENST00000537922.1:exon1:c.A232G:p.R78G	0.737374	0.201794	-0.53558	8.35596e-20	Pig biased
chr9:8062259	ENSSSCG00000039996:FAM168A	-	chr11:73298454	FAM168A	-	0.266667	0.2	-0.0666667	1	Unbiased
chr9:8566158	ENSSSCG00000020856:PPME1	-	chr11:73920216	PPME1	-	0.0804598	0.333333	0.252874	0.102219	Unbiased
chr9:17298135	ENSSSCG00000014901:PCF11	-	chr11:82868441	PCF11	-	0.230032	0.0922432	-0.137789	1.82021e-07	Unbiased
chr9:19067219	-	-	chr11:84772024	DLG2	-	0.0175439	0.166667	0.149123	0.00854537	Unbiased
chr9:35752568	ENSSSCG00000030565:GRIA4	ENSSSCG00000030565:ENSSSCT00000027751:R765G;ENSSSCG00000030565:ENSSSCT00000037154:R765G;ENSSSCG00000030565:ENSSSCT00000042517:R765G;ENSSSCG00000030565:ENSSSCT00000054101:R765G;ENSSSCG00000030565:ENSSSCT00000058908:R765G	chr11:105804694	GRIA4	GRIA4:ENST00000525187.1:exon13:c.A2293G:p.R765G,GRIA4:ENST00000530497.1:exon13:c.A2293G:p.R765G,GRIA4:ENST00000282499.5:exon14:c.A2293G:p.R765G,GRIA4:ENST00000393127.2:exon14:c.A2293G:p.R765G	0.782743	0.576375	-0.206368	1.05312e-20	Pig biased
chr9:35752581	ENSSSCG00000030565:GRIA4	-	chr11:105804707	AP000673.1	-	0.19883	0.714286	0.515455	1.3524e-07	Human biased
chr9:35752607	ENSSSCG00000030565:GRIA4	-	chr11:105804733	AP000673.1	-	0.100962	0.241379	0.140418	0.0574048	Unbiased
chr9:35753179	ENSSSCG00000030565:GRIA4	-	chr11:105805312	GRIA4	-	0.695886	0.797619	0.101734	0.0107674	Unbiased
chr9:35763409	ENSSSCG00000030565:GRIA4	-	chr11:105815057	GRIA4	-	0.0327511	0.147059	0.114308	0.00853467	Unbiased
chr9:35763410	ENSSSCG00000030565:GRIA4	-	chr11:105815058	GRIA4	-	0.209459	0.158273	-0.0511861	0.221917	Unbiased
chr9:35763411	ENSSSCG00000030565:GRIA4	-	chr11:105815059	GRIA4	-	0.29932	0.403974	0.104654	0.020694	Unbiased
chr9:35763415	ENSSSCG00000030565:GRIA4	-	chr11:105815063	GRIA4	-	0.247807	0.180124	-0.0676828	0.0824488	Unbiased
chr9:35763422	ENSSSCG00000030565:GRIA4	-	chr11:105815070	GRIA4	-	0.0318182	0.180952	0.149134	4.71331e-07	Unbiased
chr9:35763425	ENSSSCG00000030565:GRIA4	-	chr11:105815073	GRIA4	-	0.178484	0.267606	0.0891215	0.0284881	Unbiased
chr9:35763433	ENSSSCG00000030565:GRIA4	-	chr11:105815081	GRIA4	-	0.037234	0.0740741	0.03684	0.262881	Unbiased
chr9:35763448	ENSSSCG00000030565:GRIA4	-	chr11:105815096	GRIA4	-	0.0414634	0.10084	0.0593769	0.0200328	Unbiased
chr9:35763484	ENSSSCG00000030565:GRIA4	-	chr11:105815132	GRIA4	-	0.0428016	0.571429	0.528627	7.60527e-34	Human biased
chr9:35763486	ENSSSCG00000030565:GRIA4	-	chr11:105815134	GRIA4	-	0.0389105	0.0729167	0.0340062	0.260847	Unbiased
chr9:35764462	ENSSSCG00000030565:GRIA4	-	chr11:105816106	GRIA4	-	0.0794979	0.206107	0.126609	0.000807612	Unbiased
chr9:35764466	ENSSSCG00000030565:GRIA4	-	chr11:105816110	GRIA4	-	0.0549451	0.221239	0.166294	4.31974e-06	Unbiased
chr9:35764485	ENSSSCG00000030565:GRIA4	-	chr11:105816129	GRIA4	-	0.711974	0.615385	-0.0965895	0.0504792	Unbiased
chr9:35764501	ENSSSCG00000030565:GRIA4	-	chr11:105816145	GRIA4	-	0.75089	0.636364	-0.114526	0.0330473	Unbiased
chr9:35764516	ENSSSCG00000030565:GRIA4	-	chr11:105816160	GRIA4	-	0.381107	0.605882	0.224775	2.55965e-06	Human biased
chr9:35764587	ENSSSCG00000030565:GRIA4	-	chr11:105816231	GRIA4	-	0.0735786	0.283019	0.20944	5.27307e-05	Human biased
chr9:35764588	ENSSSCG00000030565:GRIA4	-	chr11:105816232	GRIA4	-	0.0483871	0.105263	0.0568761	0.261786	Unbiased
chr9:35770867	ENSSSCG00000030565:GRIA4	-	chr11:105822618	GRIA4	-	0.0746269	0.142857	0.0682303	0.430204	Unbiased
chr9:35770872	ENSSSCG00000030565:GRIA4	-	chr11:105822623	GRIA4	-	0.126984	0.222222	0.0952381	0.0188228	Unbiased
chr9:36686071	ENSSSCG00000025606:ATM	-	chr11:108167078	ATM	-	0.222222	0.0740741	-0.148148	0.250073	Unbiased
chr9:44432240	ENSSSCG00000015071:SIK3	-	chr11:116931881	SIK3	-	0.0681818	0.125	0.0568182	0.467385	Unbiased
chr9:46026507	ENSSSCG00000015097:DDX6	-	chr11:118619352	AP002954.4	-	0.0302115	0.0127595	-0.0174519	0.000907405	Unbiased
chr9:46051376	ENSSSCG00000015097:DDX6	-	chr11:118646648	DDX6	-	0.395833	0.277778	-0.118056	0.354229	Unbiased
chr9:46366673	ENSSSCG00000015113:NLRX1	-	chr11:119021427	ABCG4	-	0.205882	0.243386	0.0375039	0.617337	Unbiased
chr9:46824458	ENSSSCG00000015125:NECTIN1	-	chr11:119532688	PVRL1	-	0.0348837	0.102745	0.0678617	0.0020777	Unbiased
chr9:66431304	ENSSSCG00000022398:NUCKS1	-	chr1:205715280	NUCKS1	-	0.00934579	0.111111	0.101765	0.116759	Unbiased
chr9:66431324	ENSSSCG00000022398:NUCKS1	-	chr1:205715302	NUCKS1	-	0.0909091	0.230769	0.13986	0.123822	Unbiased
chr9:67110260	ENSSSCG00000015645:ENSSSCG00000015645	-	chr1:206630935	SRGAP2	-	0.0163043	0.488113	0.471809	6.4394e-44	Human biased
chr9:75474371	ENSSSCG00000015335:DYNC1I1	-	chr7:95442186	DYNC1I1	-	0.162162	0.4	0.237838	0.185632	Unbiased
chr9:75474386	ENSSSCG00000015335:DYNC1I1	-	chr7:95442201	DYNC1I1	-	0.160714	0.4	0.239286	0.218029	Unbiased
chr9:104904039	-	-	chr7:104643895	LINC01004	-	0.0273973	0.176471	0.149073	0.0256012	Unbiased
chr9:104904101	-	-	chr7:104643990	LINC01004	-	0.275	0.42	0.145	0.0608991	Unbiased
chr9:107936308	ENSSSCG00000015445:NRCAM	-	chr7:107794922	NRCAM	-	0.0444444	0.444444	0.4	2.04654e-05	Human biased
chr9:113975530	ENSSSCG00000015480:PRRC2C	-	chr1:171456864	PRRC2C	-	0.444444	0.555556	0.111111	0.565826	Unbiased
chr9:114528032	ENSSSCG00000018758:ENSSSCG00000018758,ENSSSCG00000038958:DNM3	-	chr1:172107978	MIR214	-	0.106195	0.166667	0.060472	0.623896	Unbiased
chr9:114528059	ENSSSCG00000018758:ENSSSCG00000018758,ENSSSCG00000038958:DNM3	-	chr1:172108005	MIR214	-	0.5	0.166667	-0.333333	0.0344822	Unbiased
chr9:116215002	ENSSSCG00000015498:RC3H1	-	chr1:173913177	RC3H1	-	0.125	0.4	0.275	0.13862	Unbiased
chr9:116215015	ENSSSCG00000015498:RC3H1	-	chr1:173913190	RC3H1	-	0.132653	0.384615	0.251962	0.0357987	Unbiased
chr9:116921808	ENSSSCG00000015499:RABGAP1L	-	chr1:174783897	RABGAP1L	-	0.25	0.25	0	1	Unbiased
chrX:10430512	ENSSSCG00000012126:ENSSSCG00000012126	-	chrX:13790128	GPM6B	-	0.021122	0.0400509	0.018929	1.6523e-08	Unbiased
chrX:34537679	ENSSSCG00000012238:ENSSSCG00000012238	-	chrX:38435258	TM4SF2,TSPAN7	-	0.125	0.428571	0.303571	0.142084	Unbiased
chrX:36818783	ENSSSCG00000012251:USP9X	-	chrX:41012183	USP9X	-	0.182927	0.4	0.217073	0.2506	Unbiased
chrX:57465689	ENSSSCG00000027115:ENSSSCG00000027115	-	chrX:70684858	TAF1	-	0	0.374286	0.374286	3.5379e-10	Human biased
chrX:57550837	ENSSSCG00000012403:OGT	-	chrX:70786802	OGT	-	0.428571	0.25	-0.178571	0.649398	Unbiased
chrX:57550841	ENSSSCG00000012403:OGT	-	chrX:70786806	OGT	-	1	0.666667	-0.333333	0.0210728	Unbiased
chrX:91660650	ENSSSCG00000012586:ALG13,ENSSSCG00000034394:ENSSSCG00000034394	-	chrX:110947107	ALG13	-	0.607477	1	0.392523	0.0826666	Unbiased
chrX:91660653	ENSSSCG00000012586:ALG13,ENSSSCG00000034394:ENSSSCG00000034394	-	chrX:110947110	ALG13	-	0.049505	1	0.950495	2.55638e-07	Human biased
chrX:91660742	ENSSSCG00000012586:ALG13,ENSSSCG00000034394:ENSSSCG00000034394	-	chrX:110947194	ALG13	-	0.65	1	0.35	0.304646	Unbiased
chrX:91660760	ENSSSCG00000012586:ALG13,ENSSSCG00000034394:ENSSSCG00000034394	-	chrX:110947209	ALG13	-	0.214286	0.7	0.485714	0.0161186	Unbiased
chrX:91661048	ENSSSCG00000012586:ALG13,ENSSSCG00000034394:ENSSSCG00000034394	-	chrX:110947494	ALG13	-	0.229167	0.545455	0.316288	0.0617643	Unbiased
chrX:91661094	ENSSSCG00000012586:ALG13,ENSSSCG00000034394:ENSSSCG00000034394	-	chrX:110947538	ALG13	-	0.556818	1	0.443182	0.0195372	Unbiased
chrX:91661106	ENSSSCG00000012586:ALG13,ENSSSCG00000034394:ENSSSCG00000034394	-	chrX:110947548	ALG13	-	0.139535	0.923077	0.783542	3.31882e-08	Human biased
chrX:91661699	ENSSSCG00000012586:ALG13,ENSSSCG00000034394:ENSSSCG00000034394	-	chrX:110948159	ALG13	-	0.0388693	0.6	0.561131	2.72311e-06	Human biased
chrX:91661702	ENSSSCG00000012586:ALG13,ENSSSCG00000034394:ENSSSCG00000034394	-	chrX:110948162	ALG13	-	0.0509091	0.8	0.749091	5.85632e-05	Human biased
chrX:98254413	-	-	chrX:119055933	RP3-327A19.5	-	0.0588235	0.4	0.341176	0.0579232	Unbiased
chrX:101083849	ENSSSCG00000012638:GRIA3	ENSSSCG00000012638:ENSSSCT00000013819:R775G;ENSSSCG00000012638:ENSSSCT00000032933:R775G;ENSSSCG00000012638:ENSSSCT00000036560:R775G	chrX:122598962	GRIA3	GRIA3:ENST00000264357.5:exon13:c.A2323G:p.R775G,GRIA3:ENST00000371251.1:exon13:c.A2323G:p.R775G,GRIA3:ENST00000371256.5:exon13:c.A2323G:p.R775G,GRIA3:ENST00000542149.1:exon13:c.A2323G:p.R775G	0.95679	0.822222	-0.134568	0.000202025	Unbiased
chrX:123475359	ENSSSCG00000025708:GABRA3	ENSSSCG00000025708:ENSSSCT00000024798:I342M;ENSSSCG00000025708:ENSSSCT00000040116:I342M;ENSSSCG00000025708:ENSSSCT00000055760:I291M	chrX:151358319	GABRA3	GABRA3:ENST00000370314.4:exon9:c.A1026G:p.I342M,GABRA3:ENST00000535043.1:exon9:c.A1026G:p.I342M	0.906977	0.576923	-0.330054	0.000332877	Pig biased

## Sheet: Table S3f
Table S3f. List of conserved editing sites in Spinal Cord
Coordinate in Pig Genome	Pig Gene	Amino Acid Change in Pig	Coordinate in Human Genome	Human Gene	Amino Acid Change in Human	Editing level in Pig	Editing level in Human	Delta editing level	P value	Type
chr1:50736742	ENSSSCG00000004276:SMAP1	-	chr6:71299053	C6orf57	-	0.647059	0.22488	-0.422178	1.94234e-06	Pig biased
chr1:50736743	ENSSSCG00000004276:SMAP1	-	chr6:71299054	C6orf57	-	0.608696	0.198347	-0.410349	5.82173e-05	Pig biased
chr1:50736757	ENSSSCG00000004276:SMAP1	-	chr6:71299066	C6orf57	-	0.181818	0.101266	-0.0805524	0.28815	Unbiased
chr1:68530727	ENSSSCG00000004361:GRIK2	ENSSSCG00000004361:ENSSSCT00000004819:I518V;ENSSSCG00000004361:ENSSSCT00000032833:I518V	chr6:102337689	GRIK2	GRIK2:ENST00000318991.6:exon11:c.A1699G:p.I567V,GRIK2:ENST00000369134.4:exon11:c.A1552G:p.I518V,GRIK2:ENST00000369138.1:exon11:c.A1699G:p.I567V,GRIK2:ENST00000413795.1:exon11:c.A1699G:p.I567V,GRIK2:ENST00000421544.1:exon11:c.A1699G:p.I567V	0.204255	0.267857	0.0636018	0.36617	Unbiased
chr1:68530740	ENSSSCG00000004361:GRIK2	ENSSSCG00000004361:ENSSSCT00000004819:Y522C;ENSSSCG00000004361:ENSSSCT00000032833:Y522C	chr6:102337702	GRIK2	GRIK2:ENST00000318991.6:exon11:c.A1712G:p.Y571C,GRIK2:ENST00000369134.4:exon11:c.A1565G:p.Y522C,GRIK2:ENST00000369138.1:exon11:c.A1712G:p.Y571C,GRIK2:ENST00000413795.1:exon11:c.A1712G:p.Y571C,GRIK2:ENST00000421544.1:exon11:c.A1712G:p.Y571C	0.278049	0.212766	-0.0652828	0.46447	Unbiased
chr1:68564368	ENSSSCG00000004361:GRIK2	ENSSSCG00000004361:ENSSSCT00000004819:G566G;ENSSSCG00000004361:ENSSSCT00000032833:G566G	chr6:102372572	GRIK2	GRIK2:ENST00000318991.6:exon12:c.A1845G:p.G615G,GRIK2:ENST00000369134.4:exon12:c.A1698G:p.G566G,GRIK2:ENST00000369138.1:exon12:c.A1845G:p.G615G,GRIK2:ENST00000413795.1:exon12:c.A1845G:p.G615G,GRIK2:ENST00000421544.1:exon12:c.A1845G:p.G615G	0.104377	0.117647	0.01327	0.695929	Unbiased
chr1:68564385	ENSSSCG00000004361:GRIK2	ENSSSCG00000004361:ENSSSCT00000004819:Q572R;ENSSSCG00000004361:ENSSSCT00000032833:Q572R	chr6:102372589	GRIK2	GRIK2:ENST00000318991.6:exon12:c.A1862G:p.Q621R,GRIK2:ENST00000369134.4:exon12:c.A1715G:p.Q572R,GRIK2:ENST00000369138.1:exon12:c.A1862G:p.Q621R,GRIK2:ENST00000413795.1:exon12:c.A1862G:p.Q621R,GRIK2:ENST00000421544.1:exon12:c.A1862G:p.Q621R	0.40625	0.5	0.09375	0.176955	Unbiased
chr1:68566369	ENSSSCG00000004361:GRIK2	-	chr6:102374634	GRIK2	-	0.15	0.75	0.6	0.000980028	Human biased
chr1:68566378	ENSSSCG00000004361:GRIK2	-	chr6:102374643	GRIK2	-	0.71875	1	0.28125	0.327296	Unbiased
chr1:163170088	ENSSSCG00000004926:PDCD7	ENSSSCG00000004926:ENSSSCT00000005436:Q43R	chr15:65425992	PDCD7	PDCD7:ENST00000204549.4:exon1:c.A128G:p.Q43R	0.00704225	0.157895	0.150852	0.00194538	Unbiased
chr1:163170163	ENSSSCG00000004926:PDCD7	ENSSSCG00000004926:ENSSSCT00000005436:Q18R	chr15:65426067	PDCD7	PDCD7:ENST00000204549.4:exon1:c.A53G:p.Q18R	0.0813397	0.147059	0.0657191	0.198989	Unbiased
chr1:268764115	ENSSSCG00000005646:COQ4	-	chr9:131092597	COQ4	-	0.0909091	0.333333	0.242424	0.0765044	Unbiased
chr12:34246815	ENSSSCG00000017623:VEZF1	-	chr17:56049824	CUEDC1,VEZF1	-	0.668269	0.230189	-0.438081	3.62037e-28	Pig biased
chr12:34246816	ENSSSCG00000017623:VEZF1	-	chr17:56049825	CUEDC1,VEZF1	-	0.12381	0.161644	0.0378343	0.271983	Unbiased
chr12:34246820	ENSSSCG00000017623:VEZF1	-	chr17:56049829	CUEDC1,VEZF1	-	0.059761	0.356275	0.296514	4.77015e-23	Human biased
chr12:44410166	ENSSSCG00000017756:NLK	-	chr17:26375487	NLK	-	0	0.25	0.25	0.00672269	Human biased
chr12:44855233	-	-	chr17:26936879	SPAG5-AS1	-	0.0606061	0.125	0.0643939	0.48818	Unbiased
chr12:44855248	-	-	chr17:26936898	SPAG5-AS1	-	0.403509	0.571429	0.16792	0.442736	Unbiased
chr13:2639980	ENSSSCG00000011190:METTL6	-	chr3:15454240	METTL6	-	0	0.345455	0.345455	2.97199e-10	Human biased
chr13:35884880	ENSSSCG00000011455:CACNA1D	ENSSSCG00000011455:ENSSSCT00000012536:I1660M	chr3:53820892	CACNA1D	CACNA1D:ENST00000540742.1:exon14:c.A1512G:p.I504M,CACNA1D:ENST00000422281.2:exon39:c.A4791G:p.I1597M,CACNA1D:ENST00000350061.5:exon40:c.A4836G:p.I1612M,CACNA1D:ENST00000288139.4:exon41:c.A4896G:p.I1632M	0.120567	0.111111	-0.00945626	1	Unbiased
chr13:39922407	ENSSSCG00000011471:FLNB	ENSSSCG00000011471:ENSSSCT00000012553:Q2243R;ENSSSCG00000011471:ENSSSCT00000040435:Q2327R;ENSSSCG00000011471:ENSSSCT00000044709:Q2303R;ENSSSCG00000011471:ENSSSCT00000064169:Q2296R	chr3:58141801	FLNB	FLNB:ENST00000493452.1:exon39:c.A6308G:p.Q2103R,FLNB:ENST00000348383.5:exon40:c.A6764G:p.Q2255R,FLNB:ENST00000358537.3:exon40:c.A6815G:p.Q2272R,FLNB:ENST00000419752.2:exon40:c.A6347G:p.Q2116R,FLNB:ENST00000295956.4:exon41:c.A6887G:p.Q2296R,FLNB:ENST00000429972.2:exon41:c.A6854G:p.Q2285R,FLNB:ENST00000490882.1:exon42:c.A6980G:p.Q2327R	0.0818394	0.0449321	-0.0369074	0.000544321	Unbiased
chr13:40073139	ENSSSCG00000035452:HTD2	-	chr3:58304278	RPP14	-	0.0230906	0.125	0.101909	0.00212682	Unbiased
chr13:40073242	ENSSSCG00000035452:HTD2	-	chr3:58304471	RPP14	-	0.0229885	0.122449	0.0994605	0.00188948	Unbiased
chr13:44020000	ENSSSCG00000011489:CADPS	ENSSSCG00000011489:ENSSSCT00000012572:E1267G;ENSSSCG00000011489:ENSSSCT00000044538:E1242G;ENSSSCG00000011489:ENSSSCT00000066159:E1251G	chr3:62423807	CADPS	CADPS:ENST00000357948.3:exon25:c.A3512G:p.E1171G,CADPS:ENST00000283269.9:exon26:c.A3632G:p.E1211G,CADPS:ENST00000383710.4:exon28:c.A3749G:p.E1250G	0.114754	0.227679	0.112924	0.000228062	Unbiased
chr13:53081395	-	-	chr3:71729589	EIF4E3	-	0.257732	0.0612245	-0.196507	0.00127639	Unbiased
chr13:69433108	ENSSSCG00000036643:ENSSSCG00000036643	-	chr3:15113852	ZFYVE20	-	0.0102326	0.0531915	0.0429589	0.0064749	Unbiased
chr13:74933694	ENSSSCG00000011640:TF	-	chr3:133467954	TFP1	-	0.040201	0.5	0.459799	5.76431e-11	Human biased
chr13:80224932	ENSSSCG00000011662:COPB2,ENSSSCG00000035771:MRPS22	-	chr3:139072534	MRPS22	-	0.1	0.2	0.1	1	Unbiased
chr13:80226718	ENSSSCG00000011662:COPB2,ENSSSCG00000035771:MRPS22	-	chr3:139074203	MRPS22	-	0.192308	0.03125	-0.161058	0.029418	Unbiased
chr13:80226720	ENSSSCG00000011662:COPB2,ENSSSCG00000035771:MRPS22	-	chr3:139074205	MRPS22	-	0	0.159664	0.159664	1.9215e-07	Unbiased
chr13:82951918	ENSSSCG00000011677:GK5	-	chr3:141882641	GK5	-	0.426471	0.28	-0.146471	0.236096	Unbiased
chr13:82951964	ENSSSCG00000011677:GK5	-	chr3:141882672	GK5	-	0.0697674	0.9375	0.867733	3.06336e-10	Human biased
chr13:82985229	ENSSSCG00000011677:GK5	-	chr3:141903621	GK5	-	0.0434783	0.0241546	-0.0193237	0.472462	Unbiased
chr13:117429056	ENSSSCG00000039285:MFN1	ENSSSCG00000039285:ENSSSCT00000039446:I328V	chr3:179093014	MFN1	MFN1:ENST00000263969.5:exon9:c.A982G:p.I328V,MFN1:ENST00000280653.7:exon10:c.A982G:p.I328V,MFN1:ENST00000471841.1:exon10:c.A982G:p.I328V	0.0579111	0.117647	0.059736	0.264702	Unbiased
chr13:192928491	ENSSSCG00000025119:GRIK1	ENSSSCG00000025119:ENSSSCT00000028121:Q636R;ENSSSCG00000025119:ENSSSCT00000045911:Q621R;ENSSSCG00000025119:ENSSSCT00000055117:Q621R;ENSSSCG00000025119:ENSSSCT00000055366:Q621R	chr21:30953750	GRIK1	GRIK1:ENST00000389125.3:exon12:c.A1862G:p.Q621R,GRIK1:ENST00000399909.1:exon12:c.A1862G:p.Q621R,GRIK1:ENST00000399914.1:exon12:c.A1862G:p.Q621R,GRIK1:ENST00000327783.4:exon13:c.A1907G:p.Q636R,GRIK1:ENST00000389124.2:exon13:c.A1907G:p.Q636R,GRIK1:ENST00000399907.1:exon13:c.A1907G:p.Q636R,GRIK1:ENST00000399913.1:exon13:c.A1907G:p.Q636R,GRIK1:ENST00000309434.7:exon14:c.A1913G:p.Q638R,GRIK1:ENST00000…	0.4375	0.514286	0.0767857	0.456571	Unbiased
chr13:197168371	ENSSSCG00000023674:SON	ENSSSCG00000023674:ENSSSCT00000026483:T274A;ENSSSCG00000023674:ENSSSCT00000060699:T413A;ENSSSCG00000023674:ENSSSCT00000063351:T413A;ENSSSCG00000023674:ENSSSCT00000065483:T413A	chr21:34922801	SON	SON:ENST00000290239.6:exon3:c.A1264G:p.T422A,SON:ENST00000300278.4:exon3:c.A1264G:p.T422A,SON:ENST00000356577.4:exon3:c.A1264G:p.T422A,SON:ENST00000381679.4:exon3:c.A1264G:p.T422A	0.0300429	0.0824176	0.0523747	0.000759975	Unbiased
chr13:197168826	ENSSSCG00000023674:SON	ENSSSCG00000023674:ENSSSCT00000026483:P425P;ENSSSCG00000023674:ENSSSCT00000060699:P564P;ENSSSCG00000023674:ENSSSCT00000063351:P564P;ENSSSCG00000023674:ENSSSCT00000065483:P564P	chr21:34923256	SON	SON:ENST00000290239.6:exon3:c.A1719G:p.P573P,SON:ENST00000300278.4:exon3:c.A1719G:p.P573P,SON:ENST00000356577.4:exon3:c.A1719G:p.P573P,SON:ENST00000381679.4:exon3:c.A1719G:p.P573P	0.075985	0.161491	0.0855057	0.000851445	Unbiased
chr13:197168845	ENSSSCG00000023674:SON	ENSSSCG00000023674:ENSSSCT00000026483:R432G;ENSSSCG00000023674:ENSSSCT00000060699:R571G;ENSSSCG00000023674:ENSSSCT00000063351:R571G;ENSSSCG00000023674:ENSSSCT00000065483:R571G	chr21:34923275	SON	SON:ENST00000290239.6:exon3:c.A1738G:p.R580G,SON:ENST00000300278.4:exon3:c.A1738G:p.R580G,SON:ENST00000356577.4:exon3:c.A1738G:p.R580G,SON:ENST00000381679.4:exon3:c.A1738G:p.R580G	0.235789	0.150943	-0.0848461	0.0547256	Unbiased
chr13:197174856	ENSSSCG00000023674:SON	-	chr21:34929694	SON	-	0.2	0.285714	0.0857143	0.63031	Unbiased
chr13:207750361	ENSSSCG00000012089:ADARB1	-	chr21:46595621	ADARB1	-	0.571429	0.2	-0.371429	0.303406	Unbiased
chr14:51473632	ENSSSCG00000010135:DGCR8,ENSSSCG00000029742:ENSSSCG00000029742	-	chr22:20073330	MIR3618	-	0.146199	0.166667	0.0204678	0.691788	Unbiased
chr14:76260957	ENSSSCG00000010301:PPP3CB	-	chr10:75207299	PPP3CB	-	0.03125	0.166667	0.135417	0.294452	Unbiased
chr14:80105988	ENSSSCG00000010325:KCNMA1	ENSSSCG00000010325:ENSSSCT00000056413:S11G	chr10:79397298	KCNMA1	KCNMA1:ENST00000286627.5:exon1:c.A103G:p.S35G,KCNMA1:ENST00000286628.8:exon1:c.A103G:p.S35G,KCNMA1:ENST00000354353.5:exon1:c.A103G:p.S35G,KCNMA1:ENST00000372440.1:exon1:c.A103G:p.S35G,KCNMA1:ENST00000372443.1:exon1:c.A103G:p.S35G,KCNMA1:ENST00000404771.3:exon1:c.A103G:p.S35G,KCNMA1:ENST00000404857.1:exon1:c.A103G:p.S35G,KCNMA1:ENST00000406533.3:exon1:c.A103G:p.S35G,KCNMA1:ENST00000480683.1:exon1:…	0.0111421	0.131868	0.120726	7.71968e-09	Unbiased
chr14:105904650	ENSSSCG00000010485:TBC1D12	-	chr10:96263582	TBC1D12	-	0.311111	0.4	0.0888889	0.649447	Unbiased
chr14:111355216	ENSSSCG00000010550:CWF19L1	-	chr10:101992805	RP11-316M21.6	-	0.0191489	0.131868	0.112719	1.66767e-09	Unbiased
chr14:111355330	ENSSSCG00000010550:CWF19L1	-	chr10:101992867	RP11-316M21.6	-	0.0176849	0.0694444	0.0517596	0.00218185	Unbiased
chr14:134302814	ENSSSCG00000010738:ZRANB1	-	chr10:126650937	ZRANB1	-	0	0.333333	0.333333	0.125	Unbiased
chr15:60377409	ENSSSCG00000015866:FMNL2	-	chr2:153498486	FMNL2	-	0.0996979	0.2	0.100302	0.415386	Unbiased
chr15:95565190	ENSSSCG00000016056:GLS	-	chr2:191799592	GLS	-	0.0402844	0.0953271	0.0550427	4.90155e-05	Unbiased
chr15:110909564	ENSSSCG00000024696:ENSSSCG00000024696	-	chr2:208619252	CCNYL1	-	0.0323276	0.0555556	0.023228	0.461424	Unbiased
chr15:110910482	ENSSSCG00000024696:ENSSSCG00000024696	-	chr2:208620129	CCNYL1	-	0.184116	0.106195	-0.0779208	0.0684846	Unbiased
chr15:110910487	ENSSSCG00000024696:ENSSSCG00000024696	-	chr2:208620134	CCNYL1	-	0.0894942	0.0357143	-0.0537799	0.487401	Unbiased
chr15:118296733	ENSSSCG00000022758:PECR	-	chr2:216903561	PECR	-	0.233701	0.123404	-0.110297	0.000129268	Unbiased
chr17:31852360	ENSSSCG00000007143:MAVS	-	chr20:3851549	MAVS,RP11-119B16.2	-	0.2	0.0136364	-0.186364	5.58199e-08	Unbiased
chr17:35263308	ENSSSCG00000007228:HM13	-	chr20:30126775	HM13	-	0.433962	0.5	0.0660377	0.620405	Unbiased
chr17:35263355	ENSSSCG00000007228:HM13	-	chr20:30126822	HM13	-	0.102564	0.148148	0.045584	0.706787	Unbiased
chr17:39475632	ENSSSCG00000007314:ENSSSCG00000007314	-	chr20:34803141	EPB41L1	-	0.0560748	0.333333	0.277259	0.0217575	Unbiased
chr17:40625064	ENSSSCG00000037248:ENSSSCG00000037248	-	chr20:36147533	BLCAP	BLCAP:ENST00000373537.2:exon2:c.A44G:p.K15R,BLCAP:ENST00000397131.1:exon2:c.A44G:p.K15R,BLCAP:ENST00000397134.1:exon2:c.A44G:p.K15R,BLCAP:ENST00000397135.1:exon2:c.A44G:p.K15R,BLCAP:ENST00000397137.1:exon2:c.A44G:p.K15R,BLCAP:ENST00000414542.2:exon3:c.A44G:p.K15R	0.218871	0.0893204	-0.129551	9.2528e-13	Unbiased
chr17:40625094	ENSSSCG00000037248:ENSSSCG00000037248	-	chr20:36147563	BLCAP	BLCAP:ENST00000373537.2:exon2:c.A14G:p.Q5R,BLCAP:ENST00000397131.1:exon2:c.A14G:p.Q5R,BLCAP:ENST00000397134.1:exon2:c.A14G:p.Q5R,BLCAP:ENST00000397135.1:exon2:c.A14G:p.Q5R,BLCAP:ENST00000397137.1:exon2:c.A14G:p.Q5R,BLCAP:ENST00000414542.2:exon3:c.A14G:p.Q5R	0.241734	0.104668	-0.137066	9.27493e-18	Unbiased
chr17:40625103	ENSSSCG00000037248:ENSSSCG00000037248	-	chr20:36147572	BLCAP	BLCAP:ENST00000373537.2:exon2:c.A5G:p.Y2C,BLCAP:ENST00000397131.1:exon2:c.A5G:p.Y2C,BLCAP:ENST00000397134.1:exon2:c.A5G:p.Y2C,BLCAP:ENST00000397135.1:exon2:c.A5G:p.Y2C,BLCAP:ENST00000397137.1:exon2:c.A5G:p.Y2C,BLCAP:ENST00000414542.2:exon3:c.A5G:p.Y2C	0.360068	0.178388	-0.18168	2.47551e-19	Unbiased
chr17:40625114	ENSSSCG00000037248:ENSSSCG00000037248	-	chr20:36147583	BLCAP	-	0.0103149	0.0243902	0.0140754	0.352004	Unbiased
chr17:40625575	ENSSSCG00000037248:ENSSSCG00000037248	-	chr20:36148080	BLCAP	-	0.692308	0.586957	-0.105351	0.451996	Unbiased
chr17:40625638	ENSSSCG00000037248:ENSSSCG00000037248	-	chr20:36148143	BLCAP	-	0.617647	0.228571	-0.389076	0.00148511	Pig biased
chr17:48092321	ENSSSCG00000007435:ENSSSCG00000007435	-	chr20:44530673	PLTP	-	0.140625	0.125	-0.015625	1	Unbiased
chr17:48340028	ENSSSCG00000007439:CDH22,ENSSSCG00000007452:TP53RK	-	chr20:44802727	CDH22	-	0.454545	0.153846	-0.300699	0.0154267	Unbiased
chr17:48340029	ENSSSCG00000007439:CDH22,ENSSSCG00000007452:TP53RK	-	chr20:44802728	CDH22	-	0.882353	0.426087	-0.456266	1.49605e-06	Pig biased
chr17:54558411	ENSSSCG00000034702:ENSSSCG00000034702	-	chr20:52104716	RP5-823G15.5	-	0.0833333	0.272727	0.189394	0.246298	Unbiased
chr17:54558412	ENSSSCG00000034702:ENSSSCG00000034702	-	chr20:52104717	RP5-823G15.5	-	0.1	0.291667	0.191667	0.385483	Unbiased
chr17:54558417	ENSSSCG00000034702:ENSSSCG00000034702	-	chr20:52104722	RP5-823G15.5	-	0.0833333	0.285714	0.202381	0.269154	Unbiased
chr17:54558438	ENSSSCG00000034702:ENSSSCG00000034702	-	chr20:52104743	RP5-823G15.5	-	0.16	0.543478	0.383478	0.00221051	Human biased
chr17:54558455	ENSSSCG00000034702:ENSSSCG00000034702	-	chr20:52104760	RP5-823G15.5	-	0.148148	0.55814	0.409991	0.000942665	Human biased
chr17:54558517	ENSSSCG00000034702:ENSSSCG00000034702	-	chr20:52104822	RP5-823G15.5	-	0.0434783	0.421053	0.377574	0.00117728	Human biased
chr17:54558536	ENSSSCG00000034702:ENSSSCG00000034702	-	chr20:52104841	RP5-823G15.5	-	0.576923	0.461538	-0.115385	0.519586	Unbiased
chr17:54558613	ENSSSCG00000034702:ENSSSCG00000034702	-	chr20:52104918	RP5-823G15.5	-	0.436893	0.425532	-0.0113613	1	Unbiased
chr18:6145761	ENSSSCG00000021475:SLC4A2,ENSSSCG00000024184:FASTK	-	chr7:150777387	FASTK	-	0.0147059	0.133929	0.119223	0.000216076	Unbiased
chr18:19121574	ENSSSCG00000016566:NRF1	-	chr7:129272287	NRF1	-	0.0703125	0.666667	0.596354	0.000745104	Human biased
chr18:19121888	ENSSSCG00000016566:NRF1	-	chr7:129272054	NRF1	-	0.00483092	0.272727	0.267896	0.000376732	Human biased
chr2:122812166	-	-	chr5:118175068	DTWD2	-	0.26	0.333333	0.0733333	0.653788	Unbiased
chr3:87350343	ENSSSCG00000008413:GPR75	-	chr2:54076334	MIR3682	-	0.22408	0.360656	0.136575	1.99096e-06	Unbiased
chr3:103092104	ENSSSCG00000008496:EIF2AK2	-	chr2:37329350	EIF2AK2	-	0.547244	0.135802	-0.411442	1.12998e-12	Pig biased
chr3:103093488	ENSSSCG00000008496:EIF2AK2	-	chr2:37328075	EIF2AK2	-	0.163654	0.392197	0.228543	1.06849e-21	Human biased
chr3:103093549	ENSSSCG00000008496:EIF2AK2	-	chr2:37328014	EIF2AK2	-	0.0761421	0.0704225	-0.0057196	1	Unbiased
chr3:103093559	ENSSSCG00000008496:EIF2AK2	-	chr2:37328000	EIF2AK2	-	0.00542888	0.0828025	0.0773737	3.74923e-08	Unbiased
chr3:103093996	ENSSSCG00000008496:EIF2AK2	-	chr2:37327675	EIF2AK2	-	0.286869	0.0434783	-0.24339	0.00771889	Pig biased
chr3:103094017	ENSSSCG00000008496:EIF2AK2	-	chr2:37327650	EIF2AK2	-	0.0234542	0.0454545	0.0220004	0.426791	Unbiased
chr3:103094019	ENSSSCG00000008496:EIF2AK2	-	chr2:37327648	EIF2AK2	-	0.12043	0.0454545	-0.0749756	0.21031	Unbiased
chr3:103094025	ENSSSCG00000008496:EIF2AK2	-	chr2:37327642	EIF2AK2	-	0.062753	0.0714286	0.00867553	0.694594	Unbiased
chr3:103094026	ENSSSCG00000008496:EIF2AK2	-	chr2:37327641	EIF2AK2	-	0.0150538	0.05	0.0349462	0.287804	Unbiased
chr3:103094054	ENSSSCG00000008496:EIF2AK2	-	chr2:37327613	EIF2AK2	-	0.127745	0.0258621	-0.101882	0.000729493	Unbiased
chr4:98233961	ENSSSCG00000006643:ANXA9	-	chr1:150966013	ANXA9	-	0.0185185	0.0358079	0.0172893	1	Unbiased
chr4:99438884	ENSSSCG00000006687:ITGA10	-	chr1:145542755	ITGA10	-	0	0.115942	0.115942	0.59748	Unbiased
chr5:14969754	ENSSSCG00000000180:FKBP11	-	chr12:49325703	AC073610.5,RP11-302B13.5	-	0	0.625	0.625	0.00653595	Human biased
chr5:22019073	ENSSSCG00000000406:PTGES3	-	chr12:57078805	PTGES3	-	0.0571429	0.515152	0.458009	2.76795e-07	Human biased
chr5:33540610	ENSSSCG00000038031:CPSF6	ENSSSCG00000038031:ENSSSCT00000039379:R202G;ENSSSCG00000038031:ENSSSCT00000041371:R150G;ENSSSCG00000038031:ENSSSCT00000053818:R202G;ENSSSCG00000038031:ENSSSCT00000055283:R202G;ENSSSCG00000038031:ENSSSCT00000064622:R202G	chr12:69651595	CPSF6	CPSF6:ENST00000266679.8:exon5:c.A604G:p.R202G,CPSF6:ENST00000435070.2:exon5:c.A604G:p.R202G	0.0491245	0.0326087	-0.0165158	0.623096	Unbiased
chr6:45578632	ENSSSCG00000025355:ZNF146	-	chr19:36707279	ZNF146,ZNF565	-	0.115385	0.888889	0.773504	8.25424e-06	Human biased
chr6:48621010	-	-	chr19:40825172	C19orf47	-	0.48	0.52439	0.0443902	0.819953	Unbiased
chr6:62312475	ENSSSCG00000003987:ZSCAN4,ENSSSCG00000029696:ENSSSCG00000029696	-	chr19:58356527	ZNF587B	-	0.0253165	0.5	0.474684	0.000435901	Human biased
chr6:79106337	ENSSSCG00000003512:EIF4G3	-	chr1:21219204	EIF4G3	EIF4G3:ENST00000537738.1:exon4:c.A463G:p.R155G	0.265487	0.5	0.234513	0.0477697	Unbiased
chr6:82167339	ENSSSCG00000003543:NIPAL3	-	chr1:24800839	NIPAL3,RCAN3	-	0.420382	0.0606061	-0.359776	1.10824e-05	Pig biased
chr6:82167852	ENSSSCG00000003543:NIPAL3	-	chr1:24801424	NIPAL3,RCAN3	-	0.26817	0.203883	-0.0642869	0.18968	Unbiased
chr6:82167935	ENSSSCG00000003543:NIPAL3	-	chr1:24801493	NIPAL3,RCAN3	-	0.0463158	0.176471	0.130155	0.000336968	Unbiased
chr6:83553567	ENSSSCG00000030660:PDIK1L	-	chr1:26451293	PDIK1L	-	0.058296	0.2	0.141704	0.00648397	Unbiased
chr6:88785866	ENSSSCG00000003613:HDAC1	-	chr1:32799883	MARCKSL1	-	0.00166101	0.000574111	-0.0010869	8.09545e-05	Unbiased
chr6:88785868	ENSSSCG00000003613:HDAC1	-	chr1:32799885	MARCKSL1	-	0.00123618	0.00149402	0.000257847	0.400407	Unbiased
chr6:88786031	ENSSSCG00000003613:HDAC1	-	chr1:32800048	MARCKSL1	-	0.00281162	0.00096432	-0.0018473	5.7911e-05	Unbiased
chr6:88786033	ENSSSCG00000003613:HDAC1	-	chr1:32800050	MARCKSL1	-	0.00249809	0.000306748	-0.00219135	2.08837e-08	Unbiased
chr6:88786036	ENSSSCG00000003613:HDAC1	-	chr1:32800053	MARCKSL1	-	0.00114977	0.000773994	-0.000375776	0.187775	Unbiased
chr6:108995339	ENSSSCG00000003711:CABYR	-	chr18:21739183	CABYR	-	0.0384615	0.666667	0.628205	1.29697e-07	Human biased
chr6:108995417	ENSSSCG00000003711:CABYR	-	chr18:21739263	CABYR	-	0.253333	1	0.746667	2.42664e-09	Human biased
chr6:118683298	ENSSSCG00000028047:DTNA	-	chr18:32405902	DTNA	-	0.0833333	1	0.916667	0.000969619	Human biased
chr7:29996245	ENSSSCG00000001520:LEMD2	ENSSSCG00000001520:ENSSSCT00000001693:S242G;ENSSSCG00000001520:ENSSSCT00000050286:S242G;ENSSSCG00000001520:ENSSSCT00000065334:S242G	chr6:33756242	LEMD2	LEMD2:ENST00000293760.5:exon1:c.A652G:p.S218G	0.0304348	0.153846	0.123411	0.0769727	Unbiased
chr7:30267188	ENSSSCG00000001523:GRM4	ENSSSCG00000001523:ENSSSCT00000001696:Q124R	chr6:34100903	GRM4	GRM4:ENST00000374181.4:exon1:c.A371G:p.Q124R,GRM4:ENST00000538487.2:exon2:c.A371G:p.Q124R	0.277457	0.0606061	-0.216851	0.00694251	Pig biased
chr7:37862310	ENSSSCG00000001646:BICRAL	-	chr6:42758123	GLTSCR1L	-	0.0522648	0.208333	0.156069	0.0125729	Unbiased
chr7:39162176	ENSSSCG00000001697:TMEM63B	ENSSSCG00000001697:ENSSSCT00000001896:Q619R;ENSSSCG00000001697:ENSSSCT00000036360:Q522R;ENSSSCG00000001697:ENSSSCT00000038739:Q619R;ENSSSCG00000001697:ENSSSCT00000039005:Q606R	chr6:44120349	TMEM63B	TMEM63B:ENST00000259746.9:exon20:c.A1856G:p.Q619R,TMEM63B:ENST00000323267.6:exon20:c.A1856G:p.Q619R	0.191715	0.0649087	-0.126806	9.0365e-12	Unbiased
chr7:75765251	ENSSSCG00000002023:PABPN1,ENSSSCG00000028190:HOMEZ	-	chr14:23781563	BCL2L2-PABPN1	-	0.0363636	0.16	0.123636	0.0386529	Unbiased
chr7:97362434	ENSSSCG00000002357:ALDH6A1	-	chr14:74526236	AC005484.5	-	0.0158501	0.0307692	0.0149191	0.189738	Unbiased
chr7:116479794	ENSSSCG00000002494:CLMN	-	chr14:95659656	CLMN	CLMN:ENST00000556441.1:exon3:c.A39G:p.K13K	0.345455	0.267857	-0.0775974	0.415056	Unbiased
chr7:121664538	-	-	chr14:101301087	RP11-123M6.2	-	0	0.127907	0.127907	0.349892	Unbiased
chr7:121681246	-	-	chr14:101317570	RP11-123M6.2	-	0.714286	0.101266	-0.61302	3.50389e-09	Pig biased
chr7:121684628	-	-	chr14:101320975	RP11-123M6.2	-	0.0291262	0.966942	0.937816	7.48959e-73	Human biased
chr8:1691779	ENSSSCG00000008692:ADD1	-	chr4:2903665	ADD1	-	0.0795455	0.444444	0.364899	0.000471854	Human biased
chr8:46206332	ENSSSCG00000024685:GRIA2	ENSSSCG00000024685:ENSSSCT00000022356:Q607R;ENSSSCG00000024685:ENSSSCT00000039120:Q607R;ENSSSCG00000024685:ENSSSCT00000066201:Q607R	chr4:158257875	GRIA2	GRIA2:ENST00000449365.1:exon10:c.A1679G:p.Q560R,GRIA2:ENST00000264426.9:exon11:c.A1820G:p.Q607R,GRIA2:ENST00000296526.7:exon11:c.A1820G:p.Q607R,GRIA2:ENST00000393815.2:exon11:c.A1679G:p.Q560R,GRIA2:ENST00000507898.1:exon11:c.A1679G:p.Q560R	1	0.671053	-0.328947	5.75972e-33	Pig biased
chr8:46206336	ENSSSCG00000024685:GRIA2	ENSSSCG00000024685:ENSSSCT00000022356:Q608Q;ENSSSCG00000024685:ENSSSCT00000039120:Q608Q;ENSSSCG00000024685:ENSSSCT00000066201:Q608Q	chr4:158257879	GRIA2	GRIA2:ENST00000449365.1:exon10:c.A1683G:p.Q561Q,GRIA2:ENST00000264426.9:exon11:c.A1824G:p.Q608Q,GRIA2:ENST00000296526.7:exon11:c.A1824G:p.Q608Q,GRIA2:ENST00000393815.2:exon11:c.A1683G:p.Q561Q,GRIA2:ENST00000507898.1:exon11:c.A1683G:p.Q561Q	0.127413	0.152416	0.0250032	0.452635	Unbiased
chr8:46206586	ENSSSCG00000024685:GRIA2	-	chr4:158258136	GRIA2	-	0.025	0.352941	0.327941	0.00194597	Human biased
chr8:46206587	ENSSSCG00000024685:GRIA2	-	chr4:158258137	GRIA2	-	0.425	0.454545	0.0295455	1	Unbiased
chr8:46235227	ENSSSCG00000024685:GRIA2	ENSSSCG00000024685:ENSSSCT00000022356:R764G;ENSSSCG00000024685:ENSSSCT00000039120:R764G;ENSSSCG00000024685:ENSSSCT00000066201:R764G	chr4:158281294	GRIA2	GRIA2:ENST00000449365.1:exon12:c.A2149G:p.R717G,GRIA2:ENST00000264426.9:exon13:c.A2290G:p.R764G,GRIA2:ENST00000296526.7:exon13:c.A2290G:p.R764G,GRIA2:ENST00000393815.2:exon13:c.A2149G:p.R717G,GRIA2:ENST00000507898.1:exon13:c.A2149G:p.R717G	0.62753	0.18843	-0.439101	4.03932e-51	Pig biased
chr8:46236457	ENSSSCG00000024685:GRIA2	-	chr4:158282538	GRIA2	-	0.0243902	0.178571	0.154181	0.0222609	Unbiased
chr8:56357499	ENSSSCG00000008913:IGFBP7	ENSSSCG00000008913:ENSSSCT00000009759:K95R;ENSSSCG00000008913:ENSSSCT00000040094:K95R;ENSSSCG00000008913:ENSSSCT00000047181:K73R	chr4:57976234	IGFBP7	IGFBP7:ENST00000295666.4:exon1:c.A284G:p.K95R,IGFBP7:ENST00000537922.1:exon1:c.A284G:p.K95R	0.797284	0.574619	-0.222665	7.98621e-62	Pig biased
chr8:56357551	ENSSSCG00000008913:IGFBP7	ENSSSCG00000008913:ENSSSCT00000009759:R78G;ENSSSCG00000008913:ENSSSCT00000040094:R78G	chr4:57976286	IGFBP7	IGFBP7:ENST00000295666.4:exon1:c.A232G:p.R78G,IGFBP7:ENST00000537922.1:exon1:c.A232G:p.R78G	0.346561	0.13676	-0.209801	7.63276e-18	Pig biased
chr9:7241856	ENSSSCG00000014817:ARAP1	-	chr11:72400408	ARAP1-AS1	-	0.0451977	0.196809	0.151611	9.7697e-06	Unbiased
chr9:17298135	ENSSSCG00000014901:PCF11	-	chr11:82868441	PCF11	-	0.131514	0.236559	0.105045	0.000467093	Unbiased
chr9:35752568	ENSSSCG00000030565:GRIA4	ENSSSCG00000030565:ENSSSCT00000027751:R765G;ENSSSCG00000030565:ENSSSCT00000037154:R765G;ENSSSCG00000030565:ENSSSCT00000042517:R765G;ENSSSCG00000030565:ENSSSCT00000054101:R765G;ENSSSCG00000030565:ENSSSCT00000058908:R765G	chr11:105804694	GRIA4	GRIA4:ENST00000525187.1:exon13:c.A2293G:p.R765G,GRIA4:ENST00000530497.1:exon13:c.A2293G:p.R765G,GRIA4:ENST00000282499.5:exon14:c.A2293G:p.R765G,GRIA4:ENST00000393127.2:exon14:c.A2293G:p.R765G	0.701613	0.382831	-0.318782	8.67926e-16	Pig biased
chr9:35752607	ENSSSCG00000030565:GRIA4	-	chr11:105804733	AP000673.1	-	0.194444	1	0.805556	0.000106504	Human biased
chr9:35763409	ENSSSCG00000030565:GRIA4	-	chr11:105815057	GRIA4	-	0.026087	1	0.973913	1.79148e-09	Human biased
chr9:35763411	ENSSSCG00000030565:GRIA4	-	chr11:105815059	GRIA4	-	0.188119	1	0.811881	2.35913e-05	Human biased
chr9:35763415	ENSSSCG00000030565:GRIA4	-	chr11:105815063	GRIA4	-	0.104348	1	0.895652	7.52243e-07	Human biased
chr9:44654734	ENSSSCG00000015079:BACE1	-	chr11:117173579	BACE1	-	0.0204082	0.777778	0.75737	4.35987e-10	Human biased
chr9:46026507	ENSSSCG00000015097:DDX6	-	chr11:118619352	AP002954.4	-	0.172771	0.0405594	-0.132212	9.60076e-46	Unbiased
chr9:46824458	ENSSSCG00000015125:NECTIN1	-	chr11:119532688	PVRL1	-	0.15534	0.144772	-0.0105677	0.626126	Unbiased
chr9:67110260	ENSSSCG00000015645:ENSSSCG00000015645	-	chr1:206630935	SRGAP2	-	0.0253165	0.464646	0.43933	2.32567e-12	Human biased
chr9:104904039	-	-	chr7:104643895	LINC01004	-	0.0393258	0.2	0.160674	0.202315	Unbiased
chrX:10430512	ENSSSCG00000012126:ENSSSCG00000012126	-	chrX:13790128	GPM6B	-	0.0341763	0.0216415	-0.0125348	1.14298e-08	Unbiased
chrX:57465689	ENSSSCG00000027115:ENSSSCG00000027115	-	chrX:70684858	TAF1	-	0.08	0.238806	0.158806	0.00205807	Unbiased
chrX:101083849	ENSSSCG00000012638:GRIA3	ENSSSCG00000012638:ENSSSCT00000013819:R775G;ENSSSCG00000012638:ENSSSCT00000032933:R775G;ENSSSCG00000012638:ENSSSCT00000036560:R775G	chrX:122598962	GRIA3	GRIA3:ENST00000264357.5:exon13:c.A2323G:p.R775G,GRIA3:ENST00000371251.1:exon13:c.A2323G:p.R775G,GRIA3:ENST00000371256.5:exon13:c.A2323G:p.R775G,GRIA3:ENST00000542149.1:exon13:c.A2323G:p.R775G	0.865306	0.416309	-0.448997	1.74189e-25	Pig biased
chrX:101083885	ENSSSCG00000012638:GRIA3	-	chrX:122598998	AL356213.1	-	0.166667	0.590909	0.424242	0.0296771	Unbiased
chrX:123475359	ENSSSCG00000025708:GABRA3	ENSSSCG00000025708:ENSSSCT00000024798:I342M;ENSSSCG00000025708:ENSSSCT00000040116:I342M;ENSSSCG00000025708:ENSSSCT00000055760:I291M	chrX:151358319	GABRA3	GABRA3:ENST00000370314.4:exon9:c.A1026G:p.I342M,GABRA3:ENST00000535043.1:exon9:c.A1026G:p.I342M	0.913462	0.6875	-0.225962	0.0120068	Unbiased
chrX:124912200	ENSSSCG00000033299:ENSSSCG00000033299	-	chrX:153579736	FLNA	-	0.571429	0.0964912	-0.474937	2.49642e-07	Pig biased
